# Supplementary material for: Epigenetics of Genes Preferentially Expressed in Dissimilar Cell Populations: Myoblasts and Cerebellum
Source: Epigenomes. 2024 Jan 26;8(1):4. doi: 10.3390/epigenomes8010004 (PMC10885033; doi:10.3390/epigenomes8010004)
Supplement: Supplementary file 1 [file epigenomes-08-00004-s001.zip › Ehrlich_Cerebellum_Myob_Pref_Expr_Genes_Suppl Tables_F_Revised_1_22_24.xlsx]

## Sheet: Table S1 Myob pref expr genes
Table S1. Genes preferentially expressed in myoblastsa
	FPKM for cell cultures								Ratio: Myoblast FPKM to average FPKM in other cell cultures
Ensemble ID	Gene nameb	Myoblast	LCL	ESC	HUVEC	NHEK	NHLF
ENSG00000091482.5	SMPX	26.074	0	0	0	0	0		#DIV/0!
ENSG00000180999.10	C1orf105	5.28472	0	0	0	0	0		#DIV/0!
ENSG00000173991.5	TCAP	2.06845	0	0	0	0	0		#DIV/0!
ENSG00000111049.3	MYF5	133.784	0.0225282	0.0325022	0	0	0		12155.5
ENSG00000182533.6	CAV3	77.2725	0.0344777	0.0266097	0	0	0		6324.75
ENSG00000133020.4	MYH8	32.7024	0.00391859	0.0177167	0	0.0126762	0		4765.53
ENSG00000122180.4	MYOG	118.042	0.0517456	0.0589023	0	0.0733491	0.0192263		2904.24
ENSG00000129152.3	MYOD1	83.6098	0.0278215	0.0972464	0.0211212	0.0210949	0		2499.04
ENSG00000168530.15	MYL1	73.0366	0.068185	0	0	0.0784866	0		2489.8
ENSG00000164122.8	ASB5	150.43	0.0314071	0	0	0.0787106	0.255383		2057.86
ENSG00000118729.11	CASQ2	43.3688	0.0419521	0.0343672	0.0248895	0.0107951	0.0138454		1723.05
ENSG00000159173.18	TNNI1	268.836	0.274291	0.403721	0	0.20392	0.0159112		1497.12
ENSG00000108878.4	CACNG1	19.2495	0	0.0727392	0	0	0		1323.19
ENSG00000092054.12	MYH7	35.1146	0.124485	0.0139125	0	0.0159982	0		1137.16
ENSG00000172000.7	ZNF556	11.95	0.0263746	0	0	0.00687938	0.0222578		1076.34
ENSG00000187616.4	TMEM8C	65.8288	0.13162	0.150579	0	0.0278929	0		1061.44
ENSG00000187908.16	DMBT1	25.801	0.0572971	0.0141148	0.0297128	0.0330006	0		961.825
ENSG00000109061.9	MYH1	12.7962	0.0144356	0.0505859	0	0.00895183	0.00955364		765.994
ENSG00000175084.11	DES	949.343	0	2.52948	0.0168709	0.367741	3.57734		731.227
ENSG00000115593.14	SMYD1	26.9022	0.0341572	0.109231	0	0.0440598	0		717.593
ENSG00000101892.11	ATP1B4	1.12711	0	0	0	0	0.00797058		707.042
ENSG00000130600.17	H19	2266.57	0.766966	7.25605	0.0517403	4.51548	5.82333		615.461
ENSG00000180209.11	MYLPF	350.303	0.71634	1.60769	0.0988597	0.435238	0.206603		571.506
ENSG00000081248.10	CACNA1S	9.77724	0.017801	0.0688397	0	0	0		564.24
ENSG00000006788.13	MYH13	2.2106	0.00951775	0.00518169	0	0.00496759	0		562.008
ENSG00000129910.7	CDH15	163.714	0.298326	0.423532	0.457869	0.0350304	0.247707		559.718
ENSG00000170162.13	VGLL2	19.8397	0.0313278	0.127438	0	0.0214387	0		550.479
ENSG00000138435.15	CHRNA1	397.865	0.0318677	0.0820711	3.4129	0.0570284	0.58768		476.879
ENSG00000047936.10	ROS1	18.2267	0.0348349	0	0	0.157906	0.00611579		458.288
ENSG00000198336.9	MYL4	127.774	0.202232	0.248615	0.50111	0.106978	0.346435		454.592
ENSG00000165917.9	RAPSN	142.682	0.539851	0.165439	0.330435	0.61026	0.0493124		420.818
ENSG00000163380.15	LMOD3	19.8063	0	0	0	0.0323093	0.255357		344.259
ENSG00000030304.13	MUSK	26.9468	0.00774979	0.0226624	0.0476468	0	0.34347		319.632
ENSG00000141161.11	UNC45B	9.88139	0.0117566	0.107482	0.0106824	0.0340524	0		301.311
ENSG00000135902.9	CHRND	13.7768	0.0590634	0.117505	0	0.0850429	0		263.306
ENSG00000185739.13	SRL	15.1089	0.0194878	0.0543418	0.124085	0.0543252	0.0450669		254.095
ENSG00000133055.8	MYBPH	237.334	0.0195618	0.0137784	0	0.0627483	4.70099		247.374
ENSG00000198842.9	DUSP27	20.4233	0.00983351	0.406639	0	0	0		245.193
ENSG00000149294.16	NCAM1	188.456	0.0559506	3.32257	0.184203	0.0743619	0.350752		236.288
ENSG00000164093.15	PITX2	39.7667	0.0918691	0.159391	0.155693	0	0.448305		232.484
ENSG00000104879.4	CKM	52.8352	0.11462	0.0713037	0	0.954917	0		231.562
ENSG00000115592.11	PRKAG3	8.73405	0.0331804	0.075731	0.0325346	0.0195972	0.0275837		231.517
ENSG00000138136.6	LBX1	1.10104	0	0	0	0	0.0239644		229.724
ENSG00000215372.6	ZNF705G	3.18002	0.00111522	0.0106719	0.0238316	0.0341694	0		227.834
ENSG00000175920.16	DOK7	44.6947	0.305018	0.106267	0.063183	0.543073	0		219.621
ENSG00000111046.3	MYF6	23.5957	0.0431844	0.435346	0.0543818	0	0.0236035		211.995
ENSG00000224982.3	TMEM233	12.7324	0	0.0563826	0.23052	0	0.0300029		200.887
ENSG00000161896.11	IP6K3	32.1585	0.0416324	0.403782	0	0.027077	0.354237		194.493
ENSG00000009709.11	PAX7	2.25743	0.00623582	0.0390222	0	0.013159	0		193.217
ENSG00000163909.7	HEYL	122.414	0.199662	2.17698	0.0494337	0.0393664	0.737986		191.068
ENSG00000109063.14	MYH3	101.253	0.575142	0.749329	0.220512	1.01983	0.12829		187.986
ENSG00000124491.15	F13A1	124.564	2.88843	0.589433	0	0	0		179.081
ENSG00000114854.7	TNNC1	329.531	2.3041	7.39024	0.040672	0.182494	0.538473		157.58
ENSG00000166317.11	SYNPO2L	39.7983	0.424267	0.302352	0.0183304	0.0587207	0.476595		155.43
ENSG00000170893.3	TRH	5.07135	0	0.0909517	0	0.0531569	0.0225724		152.127
ENSG00000197616.11	MYH6	1.86601	0.0194469	0.0498179	0	0	0		134.701
ENSG00000159251.6	ACTC1	464.605	0.00913606	17.4655	0.0217224	0.110358	0.0311597		131.707
ENSG00000158445.9	KCNB1	16.0316	0.0163979	0.502907	0.00934559	0.0306574	0.0641248		128.575
ENSG00000105664.10	COMP	8.8329	0.0747754	0.126393	0	0.0443531	0.100675		127.571
ENSG00000177238.13	TRIM72	43.1863	0.0928693	1.46363	0.00538238	0.140525	0.00409215		126.535
ENSG00000077522.12	ACTN2	90.5948	0.0340893	1.79257	1.65115	0.074822	0.145029		122.503
ENSG00000143473.12	KCNH1	16.2326	0.0375831	0.0903394	0.00250962	0.0145294	0.544409		117.735
ENSG00000078328.19	RBFOX1	21.9168	0.0288734	0.9034	0	0	0		117.545
ENSG00000118194.18	TNNT2	598.807	0.0774951	12.0901	0	13.7838	1.06141		110.838
ENSG00000167244.18	IGF2	841.159	0.0962446	3.45732	30.4388	3.38637	0.790505		110.188
ENSG00000160808.9	MYL3	8.8519	0.0804518	0.15733	0	0	0.178847		106.232
ENSG00000168509.19	HFE2	8.29983	0.109103	0.277317	0	0.0323824	0		99.0901
ENSG00000196811.11	CHRNG	13.8232	0.376722	0.176338	0.0499801	0.128048	0.00630255		93.7305
ENSG00000147573.16	TRIM55	89.0194	0.122469	0.118764	0	0.0620259	4.51604		92.3572
ENSG00000160097.16	FNDC5	64.0457	0.556051	1.92476	0.278441	0.172563	0.723908		87.5964
ENSG00000213398.7	LCAT	1.39644	0	0	0.0797322	0	0		87.5706
ENSG00000138379.4	MSTN	73.3244	0.054792	0	0.0080594	0.0851331	4.10552		86.1929
ENSG00000156885.5	COX6A2	25.4359	0	1.50634	0	0	0		84.4295
ENSG00000108823.15	SGCA	116.164	1.75183	0.127629	0	0.11342	5.27111		79.9592
ENSG00000105251.10	SHD	55.6328	0.0242478	3.44209	0.140899	0.0264366	0		76.5518
ENSG00000159263.15	SIM2	6.06448	0.0268389	0.116019	0	0.0675759	0.189532		75.8125
ENSG00000181408.3	UTS2R	17.3576	0.966843	0.218146	0	0	0.00724904		72.7942
ENSG00000049540.16	ELN	174.438	0.0270794	4.22896	0.124259	0.0725961	7.60583		72.3284
ENSG00000133454.15	MYO18B	37.7883	1.52976	0.933377	0.0065726	0.117501	0.0304881		72.1785
ENSG00000107859.9	PITX3	3.66041	0.00749073	0.1782	0	0	0.0720411		71.012
ENSG00000122367.19	LDB3	16.1143	0.197168	0.728068	0	0.062054	0.16923		69.6672
ENSG00000064300.8	NGFR	171.258	1.11541	8.44363	0.0307996	2.77417	0.02392		69.1229
ENSG00000130595.17	TNNT3	54.7846	3.96405	0.118206	0.00508851	0.0287744	0		66.5488
ENSG00000187268.11	FAM9C	1.40445	0.0928961	0.0147752	0	0	0		65.2192
ENSG00000112183.14	RBM24	54.5351	0.0272609	0.977877	1.34057	0.561353	1.33447		64.287
ENSG00000170577.7	SIX2	57.4569	0	0.294705	4.1003	0.0459839	0.033189		64.2095
ENSG00000138347.15	MYPN	25.9529	0.0227333	0.0405487	0.154089	0.721162	1.08859		64.014
ENSG00000184486.9	POU3F2	2.58236	0	0.177779	0	0.024703	0		63.7676
ENSG00000165194.15	PCDH19	12.6084	0.032127	0.126649	0.770894	0.0358294	0.0407628		62.6499
ENSG00000156096.13	UGT2B4	1.67829	0.0394006	0	0	0	0.0958232		62.056
ENSG00000205426.10	KRT81	5.7947	0.113668	0	0	0.352207	0.00836861		61.0941
ENSG00000006016.10	CRLF1	119.943	1.14882	3.45845	0.799175	2.63027	1.98082		59.8665
ENSG00000107317.12	PTGDS	124.937	0.0388476	1.5445	0.234555	0.88671	8.04196		58.1289
ENSG00000170439.6	METTL7B	29.0691	0.363888	0.666915	0	0	1.52		56.9803
ENSG00000164778.4	EN2	3.11753	0	0.0281164	0.0243066	0.216564	0.00907985		56.0572
ENSG00000144339.11	TMEFF2	23.3559	0.00969798	1.20158	0.418232	0	0.516101		54.4271
ENSG00000170290.3	SLN	6.64772	0.0856183	0.0724664	0.293558	0.168015	0		53.6403
ENSG00000139914.6	FITM1	13.5277	0.483767	0.285054	0.0921965	0.306259	0.102575		53.2649
ENSG00000151468.10	CCDC3	29.9948	0.0146638	1.95842	0.0614367	0.502499	0.299637		52.87
ENSG00000092607.13	TBX15	10.9408	0.773077	0.0645528	0	0.0100329	0.224784		51.0087
ENSG00000127743.5	IL17B	3.92239	0.136306	0.104343	0	0.050854	0.0964476		50.5528
ENSG00000168427.8	KLHL30	16.165	0.021152	0.0130196	0.0101035	0.0413246	1.58		48.5261
ENSG00000106236.3	NPTX2	102.216	0.0338808	10.5032	0.128723	0.0632822	0.0241142		47.5285
ENSG00000154736.5	ADAMTS5	45.9062	0	0.194583	0.00406295	0.0239003	4.63615		47.2413
ENSG00000186897.4	C1QL4	23.2573	0.395902	0.864507	0.317458	0.486287	0.401689		47.1589
ENSG00000130528.11	HRC	27.1108	0.0183878	2.62385	0.0541727	0.0795846	0.159337		46.18
ENSG00000145681.10	HAPLN1	29.7126	0.0602162	1.68085	0.424412	0.00944809	1.06413		45.8661
ENSG00000164694.16	FNDC1	3.49712	0.0112246	0.117465	0.0487057	0	0.20756		45.4223
ENSG00000155511.17	GRIA1	22.6803	0.139835	0.920218	0	0.181997	1.45261		42.0838
ENSG00000169271.2	HSPB3	76.3773	0.0445089	0	0	2.83904	6.30712		41.5515
ENSG00000147166.10	ITGB1BP2	16.2581	0.443334	1.04526	0.119992	0.13966	0.213407		41.4398
ENSG00000101470.9	TNNC2	54.017	0.218617	5.42208	0.117185	0.165784	0.595399		41.43
ENSG00000176887.6	SOX11	14.2169	0	0.0943206	0.00422151	0.00302303	1.64635		40.6682
ENSG00000143632.14	ACTA1	190.794	0.219247	23.0057	0.111555	0.290484	0.147913		40.1251
ENSG00000172399.5	MYOZ2	5.05347	0.0215489	0	0.29054	0.0416394	0.278818		39.9455
ENSG00000184226.14	PCDH9	23.8596	0.0205871	0.293291	1.62955	0.24998	0.801191		39.8377
ENSG00000152977.9	ZIC1	4.99961	0.0150556	0.574109	0	0	0.0568655		38.6949
ENSG00000146910.12	CNPY1	2.26662	0.0594021	0.234269	0	0	0		38.5912
ENSG00000156395.12	SORCS3	2.90814	0.0712675	0.251767	0	0	0.0553211		38.4314
ENSG00000146674.14	IGFBP3	550.446	0.129895	7.50162	8.04098	5.15969	53.0829		37.235
ENSG00000154553.13	PDLIM3	140.613	0.616455	5.47505	6.57184	0.339685	6.39756		36.2394
ENSG00000110195.12	FOLR1	17.9355	0	0.718678	0.10074	1.57852	0.148437		35.2177
ENSG00000163485.16	ADORA1	43.668	0.0761796	2.8115	0.142691	0.109297	3.14386		34.748
ENSG00000158258.16	CLSTN2	8.77563	0.0237468	0.522753	0.0119119	0.13491	0.598889		33.9559
ENSG00000170681.6	MURC	42.3874	0.052701	4.87139	0.988246	0.159283	0.405947		32.7186
ENSG00000214402.6	LCNL1	2.05872	0	0.0584581	0.0444783	0	0.228178		31.0878
ENSG00000068615.17	REEP1	9.78769	0.331833	0.70642	0.273181	0.250078	0.0405348		30.5475
ENSG00000140557.11	ST8SIA2	21.2361	0.079908	2.1964	0.814586	0.355451	0.0314224		30.5312
ENSG00000138483.2	CCDC54	1.38271	0.0238966	0	0.0384693	0.0425517	0.125073		30.0601
ENSG00000060718.20	COL11A1	79.5315	0.0356242	11.9786	0.117052	0.132439	1.2833		29.3538
ENSG00000188517.14	COL25A1	12.109	0.0337506	1.69704	0.283925	0.0518119	0.00592813		29.2142
ENSG00000185482.7	STAC3	57.4822	7.53457	1.42335	0.398758	0.477758	0.307982		28.3375
ENSG00000079393.20	DUSP13	14.6053	0.0905824	1.23956	0	1.24088	0.0211651		28.1718
ENSG00000127325.18	BEST3	3.03102	0.0127182	0	0.393354	0.108394	0.0253842		28.0728
ENSG00000157502.13	MUM1L1	1.16633	0.0134218	0.128892	0	0.0669158	0		27.872
ENSG00000112246.9	SIM1	2.75775	0.00227293	0.060047	0.432505	0	0.0081402		27.4149
ENSG00000159713.10	TPPP3	22.7529	0	0.216742	1.10074	0.0867252	2.87017		26.6155
ENSG00000108001.13	EBF3	17.3326	0.0175711	0.0913047	2.76482	0.0127938	0.506597		25.541
ENSG00000157542.9	KCNJ6	22.0934	0.00447136	1.33123	0.464255	0.090897	2.47441		25.3059
ENSG00000173662.20	TAS1R1	4.11371	0.46882	0.0929796	0.0547189	0.135904	0.0673577		25.0903
ENSG00000124701.5	APOBEC2	9.39889	1.07587	0.438188	0.0229627	0.295671	0.0466412		25.0059
ENSG00000180730.4	SHISA2	39.1717	0.00745969	6.08979	1.49495	0.212963	0.0296332		24.9985
ENSG00000183873.15	SCN5A	66.2682	0.0280186	4.84168	7.8681	0.0631574	0.594659		24.735
ENSG00000125414.18	MYH2	15.5942	0.0048561	3.14796	0.0123784	0.00599721	0.00658315		24.5363
ENSG00000158022.6	TRIM63	1.29695	0	0.0364015	0.0562669	0.172855	0		24.4225
ENSG00000111245.14	MYL2	23.932	3.99809	0.111125	0.294761	0.508582	0		24.358
ENSG00000162630.5	B3GALT2	52.712	0.0979639	0.0209721	0.0185995	0.0513737	10.7365		24.1236
ENSG00000155657.26	TTN	32.3216	3.18272	0.936719	1.34888	0.862464	0.551227		23.4827
ENSG00000159248.4	GJD2	1.60966	0.00835957	0.322873	0	0	0.0137072		23.3324
ENSG00000168754.14	FAM178B	5.5477	0.0892141	0.664273	0	0.398033	0.0407473		23.2653
ENSG00000135903.18	PAX3	1.14924	0.0331171	0.214209	0	0	0		23.2333
ENSG00000196666.4	FAM180B	1.44643	0.0831432	0.146061	0.046883	0	0.0423038		22.7147
ENSG00000128606.12	LRRC17	213.013	0.148164	1.92394	19.5835	0.279836	25.3876		22.5063
ENSG00000139292.12	LGR5	1.22774	0.0514967	0.0987621	0.0112905	0.104971	0.00731207		22.4177
ENSG00000101333.16	PLCB4	53.6689	0.0284756	5.71742	0.689991	1.16369	4.45624		22.2585
ENSG00000163083.5	INHBB	3.24126	0	0.392024	0.0870413	0.238395	0.0147042		22.1348
ENSG00000005513.9	SOX8	16.5398	0.135516	2.90717	0.462003	0.208429	0.0515175		21.9673
ENSG00000158186.12	MRAS	202.712	0.0355682	7.66795	9.71648	9.54312	19.6934		21.7238
ENSG00000142661.18	MYOM3	9.21632	0.0215749	0.114616	0.134544	1.89049	0		21.3219
ENSG00000184985.16	SORCS2	8.02536	0.0350238	0.580218	0.0388463	0.616823	0.611732		21.3141
ENSG00000170807.11	LMOD2	4.31397	0.108322	0.0721784	0.0196644	0.814408	0		21.26
ENSG00000151892.14	GFRA1	42.1158	0.042139	0.617207	0.0477211	0.071767	9.19925		21.1042
ENSG00000187634.11	SAMD11	4.86165	0.0969052	0.231884	0.0302912	0.11701	0.717842		20.3598
ENSG00000099957.16	P2RX6	16.2351	0.201091	0.155056	0.0524961	0.578158	3.01698		20.2748
ENSG00000172403.10	SYNPO2	104.928	0.0781844	0.96908	0.0473931	0.919992	23.9647		20.1945
ENSG00000132329.10	RAMP1	38.4128	0.175937	1.49146	0.253432	1.14494	6.46859		20.1444
ENSG00000224940.8	PRRT4	7.98396	0.0313685	0.906157	0	0.991619	0.057273		20.0964
ENSG00000086289.11	EPDR1	72.4937	2.62701	4.66593	0.0761751	0.0458235	11.2956		19.3724
ENSG00000196569.11	LAMA2	70.7417	1.02426	1.51953	1.386	1.60236	12.9011		19.1887
ENSG00000106772.17	PRUNE2	78.2629	0.307204	5.24405	8.01002	0.400985	6.6264		19.0063
ENSG00000100336.17	APOL4	3.44298	0.128228	0.00750441	0.191533	0.0656772	0.51809		18.896
ENSG00000152292.16	SH2D6	5.63073	0.238003	0.57337	0.110219	0.133501	0.44925		18.7149
ENSG00000166546.13	BEAN1	3.72497	0	0.0619471	0.0348683	0.899759	0.0533332		17.7395
ENSG00000149596.6	JPH2	25.8934	0.117954	0.646023	0.0307003	3.65272	2.85404		17.7317
ENSG00000179455.7	MKRN3	1.16552	0.0263832	0	0.196143	0	0.10677		17.6972
ENSG00000183091.19	NEB	22.2746	0.836011	1.90519	1.57847	1.8888	0.0982274		17.6595
ENSG00000171051.8	FPR1	3.70294	0	0.0320951	0	1.0144	0.0239903		17.2956
ENSG00000160801.13	PTH1R	6.80363	0.0953502	1.02588	0.214531	0	0.64232		17.1976
ENSG00000124743.5	KLHL31	5.61072	0.0157523	0.246094	0.0237213	1.33835	0.0244398		17.0191
ENSG00000113212.6	PCDHB7	2.23636	0.0043541	0.165753	0.161837	0.0233249	0.311299		16.7752
ENSG00000237515.8	SHISA9	39.7757	0.0293243	11.601	0	0.270981	0		16.7107
ENSG00000183691.4	NOG	14.5479	0	0.260647	0.694701	2.14945	1.34888		16.3325
ENSG00000137809.16	ITGA11	49.6898	0.165901	0.125386	0.637349	0.269589	14.3622		15.9667
ENSG00000144868.13	TMEM108	43.727	0.694638	12.7076	0.227449	0.0273736	0.160346		15.8232
ENSG00000143512.12	HHIPL2	1.85862	0.0672814	0.144704	0.0629611	0.188466	0.124613		15.8039
ENSG00000117115.12	PADI2	13.0559	1.3622	2.57881	0.0199502	0.132926	0.0378831		15.7994
ENSG00000111305.18	GSG1	6.46154	0	1.04572	0.0539524	0.124379	0.833082		15.7052
ENSG00000172508.10	CARNS1	7.72989	0.505292	1.50562	0.260521	0.0529334	0.15077		15.6151
ENSG00000165092.12	ALDH1A1	347.583	0.00936169	0.92874	95.8831	0.218166	14.3596		15.6008
ENSG00000029534.19	ANK1	29.3881	2.73222	5.59816	0.910204	0.161167	0.182248		15.3319
ENSG00000105509.10	HAS1	23.8783	0.16703	0.828093	0.0297593	6.73018	0.120729		15.1593
ENSG00000107105.14	ELAVL2	22.8477	0.151713	6.37209	0.130855	0.690694	0.237184		15.066
ENSG00000165495.15	PKNOX2	14.4424	0.0173179	2.31325	0.14922	0.269695	2.08728		14.9299
ENSG00000135744.7	AGT	3.65429	0.0245211	0.0446035	0.0553867	0.0455862	1.06897		14.7461
ENSG00000130598.15	TNNI2	17.6296	0.623898	0.0455489	0	5.34422	0		14.6579
ENSG00000122691.12	TWIST1	28.6964	0.225064	0.352536	0.0490623	2.96467	6.62002		14.0512
ENSG00000110076.18	NRXN2	24.8652	0.280622	7.88692	0.088662	0.0443602	0.737025		13.7565
ENSG00000169604.19	ANTXR1	225.466	0.0203054	18.064	8.98457	13.1154	42.0238		13.7131
ENSG00000112541.13	PDE10A	8.99081	0.0157236	0.555627	2.68178	0.00600171	0.0260958		13.6837
ENSG00000177508.11	IRX3	36.9056	0	1.55488	0	11.5433	0.49465		13.5754
ENSG00000143850.13	PLEKHA6	49.7345	0.103771	6.35771	3.24608	4.52215	4.53539		13.2519
ENSG00000169903.6	TM4SF4	2.32637	0	0	0	0	0.878509		13.2404
ENSG00000170498.8	KISS1	4.9521	0	0	1.18001	0.0404607	0.675257		13.0612
ENSG00000126778.8	SIX1	35.6284	0.0237158	0.0524438	0.272475	0.0404437	13.2735		13.0386
ENSG00000174332.5	GLIS1	3.4339	0.0196153	0.115673	0.368602	0.446582	0.371471		12.9881
ENSG00000243444.7	PALM2	4.79767	0.0808844	0.426598	0.0233362	0.537166	0.792328		12.8948
ENSG00000179300.3	ZCCHC5	1.30597	0.0820303	0	0.18381	0	0.243474		12.8209
ENSG00000198542.13	ITGBL1	181.273	0.0695549	0.0465074	12.2188	1.47278	57.9857		12.6247
ENSG00000163449.10	TMEM169	8.78688	0.875834	2.23024	0.153162	0.0433578	0.237313		12.4112
ENSG00000170276.5	HSPB2	17.1642	0.039451	0.069662	0.065881	3.41561	3.34304		12.3775
ENSG00000112186.11	CAP2	64.4005	0.0183118	6.00074	3.93574	5.45926	11.4804		11.9728
ENSG00000272674.3	PCDHB16	3.62385	0.031361	0.85471	0.138024	0.0175881	0.502859		11.7311
ENSG00000185269.11	NOTUM	1.91844	0.194863	0.489607	0.0493034	0	0.0871978		11.684
ENSG00000091137.11	SLC26A4	2.70379	0.0131725	0.0541352	0.352628	0.336824	0.400921		11.6776
ENSG00000070961.15	ATP2B1	180.127	12.771	9.30535	7.04229	15.7671	32.3114		11.6667
ENSG00000143127.12	ITGA10	27.1383	0.525724	0.126989	9.24329	0.722001	1.27848		11.406
ENSG00000107551.20	RASSF4	101.083	27.2763	9.45306	2.26985	0.139092	5.51931		11.3176
ENSG00000115468.11	EFHD1	10.612	0.0674452	3.83604	0.452218	0.0713565	0.293889		11.2393
ENSG00000197614.10	MFAP5	211.672	1.76778	1.94454	1.84648	79.783	9.12541		11.2035
ENSG00000116194.12	ANGPTL1	3.17775	0.064466	0.125897	0.0157027	0.0764709	1.14699		11.1147
ENSG00000228630.5	HOTAIR	6.66128	0.145522	0.0574371	0	2.79665	0		11.1036
ENSG00000242252.1	BGLAP	6.30233	0.772594	1.18463	0.460985	0.355672	0.104423		10.948
ENSG00000170390.15	DCLK2	12.0194	0.0640628	0.476952	1.87155	0.078888	3.01948		10.905
ENSG00000158008.9	EXTL1	3.21412	0.013235	0.679576	0.297561	0.155471	0.331942		10.8748
ENSG00000169085.11	C8orf46	2.71118	0.430956	0.181901	0.0915098	0.165855	0.395412		10.7108
ENSG00000123453.17	SARDH	17.7755	0.24327	5.64369	0.191584	0.0119177	2.20757		10.7107
ENSG00000116985.11	BMP8B	5.45428	1.62981	0.50284	0.0568693	0.253392	0.106466		10.6973
ENSG00000198796.6	ALPK2	39.223	5.05926	0.281554	0	0.0446462	12.9681		10.6854
ENSG00000124813.20	RUNX2	11.7112	0.243281	0.327848	0.00373603	1.28758	3.63014		10.6609
ENSG00000164440.14	TXLNB	2.72796	0.923623	0.0602586	0.0960096	0.0175455	0.185		10.6358
ENSG00000135424.15	ITGA7	142.574	2.54726	29.4802	0.155394	0.328287	34.6675		10.6116
ENSG00000099822.2	HCN2	17.9966	0.93435	3.64178	1.7964	1.13909	0.976282		10.6013
ENSG00000108515.17	ENO3	108.096	27.8192	15.068	3.17507	2.87658	2.19993		10.5688
ENSG00000133083.14	DCLK1	43.4282	0.0108938	19.2635	0.226076	0.0616965	1.41068		10.3534
ENSG00000203867.7	RBM20	3.05119	0.867714	0.193684	0.0654571	0.299197	0.0546877		10.3029
ENSG00000163064.6	EN1	3.38459	0	0.0493547	0	1.49666	0.0965982		10.3025
ENSG00000180447.6	GAS1	14.1403	0	2.94737	0.03835	1.2516	2.65708		10.2549
ENSG00000151320.10	AKAP6	7.47883	1.92251	0.102657	0.0469844	0.817745	0.762355		10.2387
ENSG00000061337.15	LZTS1	29.8112	0.0149312	5.04431	0.00666876	0.434973	9.06479		10.2334
ENSG00000173641.17	HSPB7	32.1684	0.19404	0.263332	0	0	15.2888		10.2147
ENSG00000048540.14	LMO3	9.13834	1.49595	2.81518	0.0541744	0.0327957	0.096361		10.1662
ENSG00000128591.15	FLNC	318.018	0.223527	5.97557	61.2335	0.871222	89.4975		10.0765
ENSG00000165617.14	DACT1	21.4285	0.638519	3.16397	0.222798	0.222514	6.54949		9.92308
ENSG00000128342.4	LIF	36.6331	1.88882	2.95679	0.852948	1.38864	11.7247		9.73672
ENSG00000104313.17	EYA1	1.45159	0.0215824	0.648261	0	0.0185037	0.0602978		9.69477
ENSG00000100678.18	SLC8A3	3.04141	1.05271	0.501753	0	0.0180877	0		9.67032
ENSG00000196218.12	RYR1	15.9741	0.194571	7.4334	0.0187288	0.631837	0.00209521		9.64545
ENSG00000123096.11	SSPN	20.5288	0.544149	0.464636	0.870349	1.35415	7.50894		9.55522
ENSG00000197769.5	MAP1LC3C	4.83582	0	2.00304	0	0	0.534826		9.52734
ENSG00000179542.15	SLITRK4	7.2315	0.00827416	3.64307	0.121795	0.0167319	0.0122061		9.50993
ENSG00000174600.13	CMKLR1	19.5947	9.51335	0.652884	0.133574	0	0.132031		9.39176
ENSG00000157766.15	ACAN	6.83689	0	0.555041	0.0247555	0.00674868	3.09617		9.2824
ENSG00000183671.12	GPR1	22.819	0	0.593207	0.0571847	6.99005	4.72461		9.22721
ENSG00000036448.9	MYOM2	7.42925	0.409133	0.77709	0.281167	1.35341	1.25199		9.12058
ENSG00000134243.11	SORT1	87.891	1.66533	16.8182	3.93774	8.77331	17.3342		9.05555
ENSG00000170175.10	CHRNB1	80.5857	7.98505	10.9142	2.27506	21.1575	2.23889		9.04021
ENSG00000146122.16	DAAM2	40.7727	0.0572182	1.38838	0.19944	0	21.0562		8.98027
ENSG00000197479.6	PCDHB11	1.34468	0.0275104	0.435891	0.0794523	0.0527452	0.15937		8.9055
ENSG00000082126.17	MPP4	9.42266	0.0329943	0.0336886	3.77396	0.195981	1.25583		8.90198
ENSG00000120669.15	SOHLH2	1.13513	0	0.350822	0.237655	0.0272911	0.025355		8.85267
ENSG00000164318.17	EGFLAM	13.399	0.0328114	0.320627	0.120632	0.177595	6.99084		8.7661
ENSG00000198948.11	MFAP3L	17.4537	0.119689	3.41171	0.247007	5.89445	0.294592		8.75534
ENSG00000196420.7	S100A5	3.41546	0.377414	0.178445	0.0569567	0.637141	0.708943		8.7178
ENSG00000152049.6	KCNE4	12.2756	0.0475163	0.0878244	0.0813877	0.101865	6.74973		8.6835
ENSG00000162745.10	OLFML2B	38.0786	0.103638	7.35872	0.829439	0.0517402	13.7708		8.60947
ENSG00000064787.13	BCAS1	6.75108	3.36291	0.474924	6.2963e-07	0.0824679	0.0736824		8.45157
ENSG00000058335.15	RASGRF1	4.91469	2.01667	0.543137	0.116127	0.10863	0.135835		8.41442
ENSG00000170961.6	HAS2	61.146	0.00418855	1.02816	0.14391	0.485716	34.9822		8.3432
ENSG00000162692.10	VCAM1	20.3416	2.63117	0.297709	4.6845	0	4.64709		8.29561
ENSG00000163737.3	PF4	2.15383	0	0.887964	0	0.178653	0.24718		8.19697
ENSG00000176595.3	KBTBD11	5.27733	0.0968741	2.51274	0.441132	0.0828359	0.122262		8.1044
ENSG00000132429.9	POPDC3	28.9018	0.108429	2.21303	2.52965	5.08572	7.98467		8.06343
ENSG00000171004.18	HS6ST2	6.84396	0.00899133	3.56764	0.333252	0.33725	0		8.05715
ENSG00000144485.10	HES6	42.7465	1.12416	20.5107	1.60511	1.8339	1.48821		8.04652
ENSG00000165072.9	MAMDC2	28.229	0.0138863	6.15158	2.37745	3.88999	5.12063		8.04084
ENSG00000133063.15	CHIT1	1.64784	0.826361	0.0582314	0	0.110319	0.0337512		8.00961
ENSG00000136383.6	ALPK3	33.2655	0.0423739	7.04633	13.4831	0.250107	0.0310468		7.97622
ENSG00000064042.17	LIMCH1	22.6007	0.0369203	2.647	7.86747	2.10035	1.58794		7.9358
ENSG00000162551.13	ALPL	247.664	0.0981919	155.049	0.0540508	0.0575472	0.995789		7.925
ENSG00000135636.13	DYSF	78.1172	0.107603	5.51676	30.6561	12.8021	0.400147		7.89338
ENSG00000184792.15	OSBP2	25.3018	1.57899	4.42687	3.54201	4.86699	1.66264		7.8687
ENSG00000206145.8	P2RX6P	1.31303	0	0	0	0.115855	0.721781		7.83769
ENSG00000184058.12	TBX1	19.4208	0	0.021192	11.831	0.565032	0.0261713		7.80365
ENSG00000180818.4	HOXC10	39.2001	0.0189961	0.0606887	4.44898	20.5587	0.0317505		7.80285
ENSG00000168497.4	SDPR	206.064	0.0123212	0.0283304	110.774	3.88656	17.7045		7.78154
ENSG00000064309.14	CDON	26.2848	0.825965	9.01837	2.62454	1.24068	3.19566		7.77417
ENSG00000183023.18	SLC8A1	18.3882	0.033092	1.39368	0.62343	1.26377	8.56867		7.73742
ENSG00000115523.16	GNLY	0.995456	0.306871	0.275682	0.0315175	0.029488	0		7.734
ENSG00000168743.12	NPNT	39.5478	24.0069	0.621571	0.0188922	0.896994	0.0809163		7.71657
ENSG00000156218.12	ADAMTSL3	1.82837	0.35782	0.686351	0	0.0158117	0.127166		7.70065
ENSG00000188004.9	C1orf204	1.61099	0.012227	0.0722813	0.192386	0.310825	0.462782		7.66772
ENSG00000113739.10	STC2	230.612	7.70495	38.3422	38.2993	10.5552	55.9356		7.64439
ENSG00000138100.13	TRIM54	9.00195	0.0465395	5.35502	0.375626	0	0.127159		7.62316
ENSG00000253910.2	PCDHGB2	7.45567	0.254374	1.1477	0.576146	0.196701	2.73551		7.59167
ENSG00000203727.3	SAMD5	15.0705	0.0254723	0.00781761	4.2639	0.996776	4.73888		7.51058
ENSG00000169994.18	MYO7B	4.25263	2.43733	0.0248926	0.287862	0.0740189	0.0243578		7.46479
ENSG00000180914.10	OXTR	54.4671	4.67217	1.01888	0.119849	0.199404	30.5027		7.45858
ENSG00000175294.5	CATSPER1	2.60372	0.0907836	0.00899602	0.799826	0.644781	0.208006		7.42904
ENSG00000177839.6	PCDHB9	1.13512	0.0488133	0.454005	0.128365	0	0.132808		7.42888
ENSG00000184838.14	PRR16	42.5456	0.0376842	1.55443	7.99764	0.0874915	19.1482		7.37985
ENSG00000180332.6	KCTD4	1.39591	0.0578772	0	0.0100336	0.718903	0.162099		7.35531
ENSG00000122863.5	CHST3	39.8231	0.0762779	2.57951	6.46136	9.44483	8.52985		7.34966
ENSG00000166033.11	HTRA1	473.326	0.0123474	12.9389	94.0697	129.043	90.035		7.25739
ENSG00000102683.7	SGCG	2.45585	0.522872	0.195005	0.238243	0.45667	0.282818		7.2418
ENSG00000151491.12	EPS8	88.2215	1.9686	3.35219	14.5043	2.55894	38.7322		7.21752
ENSG00000143028.8	SYPL2	4.54492	0.172583	1.51733	0	0.00736006	1.45439		7.21036
ENSG00000125384.6	PTGER2	27.8837	0.177072	0.797207	0	0.195082	18.1912		7.20115
ENSG00000120324.8	PCDHB10	2.49373	0.0207788	0.992215	0.42252	0.0218822	0.286983		7.1479
ENSG00000197880.8	MDS2	2.48887	1.72976	0.0148134	0	0	0		7.13319
ENSG00000185585.19	OLFML2A	28.2669	0.286644	5.18408	0.438723	1.72865	12.195		7.12618
ENSG00000158292.6	GPR153	48.53	3.93176	3.7136	4.54168	13.2841	8.73593		7.09355
ENSG00000168874.12	ATOH8	38.3647	0.111766	0.692828	14.7162	0.138084	11.4688		7.07113
ENSG00000123388.4	HOXC11	8.88371	0.0218755	0.0719149	0	6.20095	0		7.05646
ENSG00000108821.13	COL1A1	1271.3	4.55775	71.6006	0.917271	12.2324	812.55		7.04823
ENSG00000150556.16	LYPD6B	51.4642	9.9975	2.72437	0	23.8669	0.0323024		7.02659
ENSG00000090539.15	CHRD	4.49101	0.0574798	0.887289	0.386038	0.00536321	1.87403		6.9949
ENSG00000088756.12	ARHGAP28	13.5884	0	3.05154	3.51063	0.2209	2.93435		6.99179
ENSG00000175544.13	CABP4	4.21593	1.40429	0.0730506	1.36813	0.194112	0		6.93505
ENSG00000054392.12	HHAT	15.8292	3.90858	0.278968	1.61991	3.71252	1.93957		6.90655
ENSG00000142178.7	SIK1	81.6462	11.5217	3.43856	7.29161	36.1688	0.823262		6.89067
ENSG00000116183.10	PAPPA2	1.44018	0.020599	0.276813	0.115473	0.373975	0.259254		6.88349
ENSG00000138395.14	CDK15	4.55006	0.0663563	0.0460668	0	0.187335	3.01717		6.85883
ENSG00000168925.10	CTRB1	1.2075	0.286692	0.0344818	0.366277	0.0768515	0.116988		6.85078
ENSG00000183682.7	BMP8A	1.97299	0.4938	0.438223	0.0549544	0.310745	0.143067		6.84691
ENSG00000196502.11	SULT1A1	12.534	0.592247	2.64974	2.06465	1.44747	2.41387		6.83577
ENSG00000184160.7	ADRA2C	14.9571	0	10.1101	0.0333041	0.210298	0.588863		6.83437
ENSG00000162267.12	ITIH3	1.92598	0.218175	0.290093	0.167507	0.110695	0.632144		6.78824
ENSG00000139304.12	PTPRQ	2.77429	0.0144538	0	0	0	2.03412		6.77126
ENSG00000071282.11	LMCD1	86.1046	2.67842	11.241	8.64547	2.2095	38.853		6.76632
ENSG00000197381.15	ADARB1	76.4292	2.61429	6.08989	23.6775	10.8766	13.8324		6.69365
ENSG00000133048.12	CHI3L1	20.4229	0.48085	0.663203	0	2.27176	11.8762		6.67767
ENSG00000172986.12	GXYLT2	14.3598	0.995664	1.278	0.250023	0.852714	7.42837		6.64512
ENSG00000166741.7	NNMT	421.726	0.0254656	0.0913422	187.91	0.991364	130.61		6.59713
ENSG00000136153.19	LMO7	231.081	38.952	10.2712	12.8214	22.5293	90.5878		6.59621
ENSG00000087116.14	ADAMTS2	73.541	0	4.81355	0.00984821	0.0202299	51.1541		6.56642
ENSG00000070031.3	SCT	1.00831	0	0.768911	0	0	0		6.55674
ENSG00000145075.11	CCDC39	2.25375	0.36747	0.602192	0.490616	0.0368375	0.227315		6.53476
ENSG00000132688.10	NES	387.609	0.0613756	95.0045	80.8713	0.225367	121.862		6.50296
ENSG00000091656.15	ZFHX4	6.75427	0.198534	0.495574	2.60472	0.527276	1.37191		6.49697
ENSG00000079308.16	TNS1	115.547	1.27692	2.62385	19.8582	5.13057	60.3132		6.47664
ENSG00000123364.4	HOXC13	12.0519	0	0.0419963	0	9.26328	0		6.47584
ENSG00000139209.15	SLC38A4	11.0939	0.718422	4.96541	0.312364	0.707304	1.88201		6.46083
ENSG00000168505.6	GBX2	10.4028	0	0.711488	6.77416	0.484902	0.107184		6.43921
ENSG00000130222.10	GADD45G	21.1936	2.07646	9.60387	0.891644	3.24887	0.722146		6.40561
ENSG00000197872.11	FAM49A	40.1816	2.16714	2.8572	20.8531	2.29631	3.3649		6.37022
ENSG00000162616.8	DNAJB4	194.953	7.14116	11.7373	75.1032	20.9628	38.8597		6.33771
ENSG00000138316.10	ADAMTS14	11.3988	0.0954777	2.65473	0.00868695	0.886905	5.36173		6.32738
ENSG00000187372.11	PCDHB13	3.72303	0.0469287	1.37586	0.977282	0.242309	0.299663		6.32728
ENSG00000144891.17	AGTR1	1.66305	0	0.0186694	0	0	1.30885		6.26375
ENSG00000154556.17	SORBS2	69.3973	1.36517	32.0401	20.762	0.319356	0.913853		6.26324
ENSG00000153233.12	PTPRR	2.44205	0.0571859	0.156344	0.22293	1.36961	0.143702		6.26238
ENSG00000173166.17	RAPH1	60.5393	0.139773	5.87116	20.1838	7.30529	15.1312		6.22433
ENSG00000149571.11	KIRREL3	8.31003	0.0618325	0.229358	0.368025	0.313388	5.71615		6.21194
ENSG00000132821.11	VSTM2L	7.45164	0.237738	1.81195	1.24613	1.76606	0.942664		6.205
ENSG00000138193.15	PLCE1	3.58749	0.869514	0.426044	0.325782	0.269545	1.0071		6.18962
ENSG00000214517.9	PPME1	158.542	31.3131	22.6394	23.9819	28.1607	22.1417		6.1816
ENSG00000074590.13	NUAK1	44.9589	0.0107616	7.72853	12.6691	9.65508	6.37061		6.1699
ENSG00000182022.17	CHST15	47.2382	0.492443	5.80374	4.85717	21.3506	5.91229		6.1482
ENSG00000135074.15	ADAM19	118.197	17.4136	7.08127	14.0299	30.2723	27.4386		6.14099
ENSG00000184185.9	KCNJ12	4.5074	0.0456882	0.681954	2.27644	0.11448	0.567645		6.11387
ENSG00000156466.9	GDF6	34.3489	0.0499196	0.237066	26.1808	0	1.65036		6.10796
ENSG00000206190.11	ATP10A	15.4838	0.204907	3.14782	0.00070748	0	9.4232		6.05941
ENSG00000120729.9	MYOT	1.91172	0.927606	0	0	0.620557	0.0372759		6.02898
ENSG00000121690.10	DEPDC7	19.5884	0.63092	2.64298	0.481759	8.41626	4.08886		6.02321
ENSG00000006534.15	ALDH3B1	35.4121	0.19413	0.464419	0.181869	0.889706	27.8078		5.99433
ENSG00000166147.13	FBN1	205.874	4.65505	2.37202	61.0209	1.14623	102.722		5.98763
ENSG00000187123.14	LYPD6	12.5983	0.0466811	4.68402	3.71548	0.955528	1.14131		5.97469
ENSG00000163492.14	CCDC141	6.59038	3.04751	2.43927	0.00783838	0.00248177	0.0243802		5.96796
ENSG00000120708.16	TGFBI	558.292	0.364758	7.25506	46.6412	122.393	291.618		5.9612
ENSG00000116774.11	OLFML3	184.773	0.0137303	51.6622	1.83747	2.7754	99.6624		5.92406
ENSG00000095752.6	IL11	6.01454	0.147627	1.00335	0.0411636	2.47173	1.43297		5.90026
ENSG00000185972.5	CCIN	2.15051	0.0092961	0.140234	1.02933	0.0773699	0.566613		5.89878
ENSG00000165887.11	ANKRD2	4.8884	0.0479365	0.0478236	2.69568	0.837335	0.520256		5.89102
ENSG00000162614.18	NEXN	114.575	10.0485	2.41873	19.2618	5.60676	60.0174		5.88449
ENSG00000117586.10	TNFSF4	93.721	6.78913	0.470457	67.1021	0.444366	4.82982		5.88435
ENSG00000107821.14	KAZALD1	15.7882	1.52515	0.770642	0.682024	0.655577	9.7954		5.87849
ENSG00000197361.7	FBXL22	1.65109	0.298842	0.289092	0.0852706	0.0983686	0.636095		5.86464
ENSG00000116035.2	VAX2	4.29021	0	0	1.39012	0.0920505	2.17592		5.86399
ENSG00000155816.19	FMN2	9.64464	0	1.0223	0.553255	0.0169569	6.64122		5.85678
ENSG00000129116.17	PALLD	307.21	0.506635	16.282	18.1118	96.2239	131.145		5.85677
ENSG00000011028.13	MRC2	171.28	1.76866	11.5622	18.5715	28.9477	86.8967		5.79639
ENSG00000120327.6	PCDHB14	3.53971	0.0476794	1.36306	0.642122	0.507604	0.500392		5.78222
ENSG00000136717.14	BIN1	163.998	41.7601	32.2276	42.6802	4.63764	20.8693		5.76747
ENSG00000148677.6	ANKRD1	365.039	0.065701	0.279691	310.462	3.2489	3.54724		5.74678
ENSG00000138356.13	AOX1	39.0081	0.203549	4.37786	0.232213	4.12755	25.0694		5.7347
ENSG00000185950.8	IRS2	30.1434	0.699044	6.27988	2.57234	12.3348	4.6365		5.68259
ENSG00000198108.3	CHSY3	4.52894	0	0.861045	2.17325	0.318255	0.663643		5.63834
ENSG00000178031.16	ADAMTSL1	83.2371	0.0633108	1.05585	54.8528	0.599791	18.6163		5.53526
ENSG00000162595.5	DIRAS3	6.23749	0.0291602	0.0425549	2.54666	0.104319	2.92051		5.52654
ENSG00000101638.13	ST8SIA5	4.12617	0.294135	2.89804	0.0715123	0.246064	0.241328		5.49998
ENSG00000112276.13	BVES	10.5475	0.230528	1.5175	1.9025	1.72177	4.26545		5.47195
ENSG00000099953.9	MMP11	28.1683	0.671362	8.4757	11.6846	0.155042	4.75768		5.47076
ENSG00000166963.12	MAP1A	74.681	0.0854787	1.79158	3.51395	0.2541	62.6745		5.46557
ENSG00000146197.8	SCUBE3	4.48196	0.62927	1.21186	1.70028	0.0457303	0.573021		5.38676
ENSG00000163171.7	CDC42EP3	131.01	22.4973	10.9328	13.2664	18.4715	56.4381		5.38665
ENSG00000164112.12	TMEM155	1.78573	0.0188419	0.61259	0.158318	0	0.869205		5.3821
ENSG00000126217.20	MCF2L	20.5444	1.51152	16.8841	0.111614	0.53102	0.119733		5.36185
ENSG00000187550.8	SBK2	7.54838	0.0694336	6.95627	0	0.00248415	0.014166		5.35928
ENSG00000211448.11	DIO2	3.4176	0.0189947	0.0480882	1.50535	0.221802	1.39443		5.35898
ENSG00000148541.12	FAM13C	2.96989	0.059303	0.686522	0	0.280292	1.74789		5.35308
ENSG00000149633.11	KIAA1755	5.21604	0.034499	0.232351	2.8561	0.0995167	1.65581		5.34619
ENSG00000170214.3	ADRA1B	6.2798	0.0507386	0.0705707	1.52054	1.21153	3.02738		5.33928
ENSG00000055813.5	CCDC85A	12.0223	0.0468249	0.71794	10.3284	0.0639239	0.107781		5.3362
ENSG00000036672.15	USP2	16.5439	0.192221	5.04841	0.878275	8.5762	0.846787		5.32236
ENSG00000137960.5	GIPC2	2.80137	0.106335	0.397532	1.58609	0.153005	0.398095		5.30349
ENSG00000123342.15	MMP19	16.4477	0.727856	1.80646	1.75718	1.64163	9.5939		5.29647
ENSG00000204219.9	TCEA3	14.789	0.210319	0.110901	2.91499	1.40299	9.33375		5.29199
ENSG00000172379.20	ARNT2	30.4709	0.580528	8.24292	0.190245	0.108122	19.8023		5.26738
ENSG00000082014.16	SMARCD3	39.1187	2.91108	4.31279	6.99859	4.69156	18.3747		5.24538
ENSG00000107518.16	ATRNL1	7.11128	2.16287	4.31788	0	0.08602	0.261882		5.20695
ENSG00000182667.14	NTM	51.7861	0	15.8572	2.94838	17.7128	13.251		5.2026
ENSG00000105810.9	CDK6	64.8787	15.4428	5.50887	6.38141	27.8071	7.99594		5.138
ENSG00000166086.12	JAM3	144.4	1.49566	24.2647	64.2145	11.1222	39.5061		5.13502
ENSG00000105696.8	TMEM59L	10.9772	0.0748981	8.6932	0.788974	0.395166	0.780944		5.11367
ENSG00000185697.16	MYBL1	14.0898	1.98413	1.75374	2.64066	0.972454	6.42816		5.11273
ENSG00000183287.13	CCBE1	93.8248	0.0693878	2.85401	0.0722263	8.69589	80.7348		5.07566
ENSG00000221986.6	MYBPHL	1.42971	0.0586414	0.419024	0.0566504	0.809307	0.0720003		5.04975
ENSG00000005073.5	HOXA11	10.404	0.0263496	0.0251294	9.84038	0.246415	0.185699		5.03878
ENSG00000148848.14	ADAM12	36.8746	0.0520255	0.0959965	0.403012	0.108095	36.0438		5.02339
ENSG00000170624.13	SGCD	49.3987	12.8128	2.43301	5.48041	9.00187	19.5611		5.01112
ENSG00000152779.13	SLC16A12	2.35505	0	2.05702	0.027226	0.0293829	0.239332		5.00443
ENSG00000196549.10	MME	76.7074	0.0144779	10.4765	7.54632	7.11695	51.6181		4.99577
aFPKM from ENCODE RNA-seq data (see Methods). Preferential expression is defined as the genes that have a ratio of myoblast FPKM to the average FPKM of the five other cell cultures of ≥ 5 and a myoblast FPKM of ≥ 1. -, not detected
bThe data for the genes that are also preferentially expressed in cerebellum (Myob/Cbl genes) is shown in purple font
c LCL, lymphoblastoid cell line (GM12848); ESC, human embryonic stem cells (H1); HUVEC, human umbilical cord epithelial cells; NHEK, normal human erythroid keratinocytes; NHLF, lung fibroblasts; #DIV/0!, ratios that had 0 in the denominator

## Sheet: Table S2 Cbl pref expr genes
Table S2. Genes with preferential expression in cerebelluma
					TPM for 13 brain regions														TPM for 41 non-Brain tissues
Ensemble ID	Gene nameb	Ratio: TPM cerebellum to average TPM of 10 other brain tissuesc	Ratio: TPM cerebellum to average TPM of 41 non-brain tissues		Cerebellum	Cerebellar Hemisphere	Amygdala	Anterior cingulate cortex (BA24)	Caudate (basal ganglia)	Cortex	Frontal Cortex (BA9)	Hippocampus	Hypothalamus	Nucleus accumbens (basal ganglia)	Putamen (basal ganglia)	Spinal cord (cervical c-1)	Substantia nigra		Adipose - Subcutaneous	Adipose - Visceral (Omentum)	Adrenal Gland	Artery - Aorta	Artery - Coronary	Artery - Tibial	Bladder	Breast - Mammary Tissue	Cells - Cultured fibroblasts	Cells - EBV-transformed lymphocytes	Cervix - Ectocervix	Cervix - Endocervix	Colon - Sigmoid	Colon - Transverse	Esophagus - Gastroesophageal Junction	Esophagus - Mucosa	Esophagus - Muscularis	Fallopian Tube	Heart - Atrial Appendage	Heart - Left Ventricle	Kidney - Cortex	Kidney - Medulla	Liver	Lung	Minor Salivary Gland	Muscle - Skeletal	Nerve - Tibial	Ovary	Pancreas	Pituitary	Prostate
ENSG00000129910.7	CDH15	1441.11	107.324		140.53	130.374	0.0469888	0.0595479	0.15946	0.0602508	0.0556473	0.066643	0.0789845	0.103192	0.103936	0.241953	0.0587977		0.0816304	0.0698937	0.210816	0.17921	0.36292	0.102797	0.0960443	0.0988588	0.235236	0.125573	0.680867	1.75946	0.108771	0.0838769	0.254928	0.0449908	0.242028	0.208968	0.168653	0.0463967	0.0798315	0.0652234	0.332581	0.606932	0.219012	34.4928	7.87083	0.355052	0.100469	0.165563	0.202327
ENSG00000164778.4	EN2	200.722	350.518		68.0385	79.3288	0.174222	0.16912	0.194211	0.203338	0.161683	0.225585	0.126117	0.196822	0.193328	0.636663	1.31194		0.0795146	0.114578	0.103252	0.065519	0.0762154	0.0559995	0.0526562	0.167095	0.0223061	0.0137036	0.145815	0.452111	0.0825851	0.0318765	0.101095	0.0349285	0.0969341	0.284143	0.0477725	0.0143686	0.0239092	0.186133	0.0169509	0.0268834	0.0477352	0.228506	0.317819	1.28537	0.0404544	0.370742	0.0676339
ENSG00000146910.12	CNPY1	158.398	778.257		26.306	29.1545	0.10782	0.147221	0.139222	0.134723	0.122966	0.122389	0.0833983	0.194831	0.113217	0.271992	0.357701		0	0	0	0	0	0	0	0.0161962	0	0	0.0271481	0.0306804	0.0166981	0	0	0	0	0.0374518	0	0	0	0	0	0	0	0.023755	0.305178	0.0823895	0.0404466	0.103243	0
ENSG00000138136.6	LBX1	77.5901	12.1327		3.01528	2.53683	0	0.013486	0	0.0212657	0.0175251	0.0153653	0.0107723	0	0	0.331468	0		0.00678093	0	0	0	0.0110759	0	0	0	0	0	0.0181742	0	0	0	0	0	0	0	0	0	0	0	0	0.282523	0.0190683	9.73664	0	0	0	0.00829329	0
ENSG00000152977.9	ZIC1	56.7521	724.06		311.12	426.022	2.37515	5.1299	5.4146	5.62523	4.79054	4.70264	7.34553	7.17248	5.70783	8.04546	4.13671		2.03788	0.0134755	0.0303496	0.0745785	0.098279	0.0744855	0.00757396	0.065073	8.24793	0.0150722	0.0113896	0.0124006	0.0220913	0.0232374	0.0289782	0.0254294	0.0209479	0.0404167	0.0212755	0.0125252	0.017175	0.0165306	2.12082	0.0435153	0.0476616	1.55238	0.0902596	0.0425678	0.0113222	0.690076	0.0346745
ENSG00000177238.13	TRIM72	52.73	9.74775		11.9551	13.355	0.203646	0.312323	0.190928	0.376522	0.359875	0.138454	0.200488	0.450995	0.202806	0.12268	0.0850326		0.0634081	0.0495453	0.0198685	0.0480886	0.0974318	0.053435	0.0416273	0.0581958	0.0133299	0.0789492	0.0808215	0.038251	0.0668885	0.0502444	0.0818079	0.0282867	0.0755649	0.0877589	0.0542952	0.169328	0.0313728	0.027192	0.0111067	0.0507428	0.184241	47.4147	0.172652	0.0566506	0.0106368	0.0369261	0.0522143
ENSG00000184185.9	KCNJ12	40.1487	39.3198		80.5539	82.368	1.1363	3.14436	2.08136	5.28502	5.40763	0.731681	1.61112	1.90771	1.88871	0.844812	1.31022		1.30918	2.01166	0.417833	0.817831	1.16065	0.572116	1.04006	1.37846	0.231958	0.282732	2.3927	2.29086	1.53968	1.18735	1.22704	0.247585	0.9455	2.78601	4.88323	3.81159	0.97886	1.96781	0.090681	3.43141	0.561104	25.0433	0.983666	0.626892	0.137678	1.19917	0.663299
ENSG00000135903.18	PAX3	28.3887	9.57214		4.03994	2.29041	0.00715238	0.0150484	0.0116645	0.0131962	0.0188508	0.00578919	0.056818	0.00728621	0.00721449	0.838649	0.454606		0.398011	0	0	0	0.302237	1.42896	0.0576526	1.08916	1.17643	0.032572	0.417605	0.307426	0	0	0	0	0	0.073421	0.0427782	0	0.00736933	0.011887	0	0	4.62526	0.991746	0.0122754	0	0	0.0363562	0.142884
ENSG00000172000.7	ZNF556	27.4331	13.3577		2.36945	3.14641	0.081847	0.0730664	0.10612	0.0667034	0.0851121	0.0841495	0.0706521	0.0778423	0.0638922	0.125476	0.0955616		0.0288524	0.0805882	0.0289217	0.030419	0.0276923	0.0372023	0.0232186	0.0617352	0.011621	0.0220648	0.108027	0.197484	0.0352107	0.0250974	0.058951	0.759355	0.0544347	0.42682	0.0134277	0.0107679	0.169725	0.121373	0.00723517	0.0287063	0.237148	0.335262	0.157811	2.82889	0.0149231	0.101753	0.0324029
ENSG00000175920.16	DOK7	27.4284	5.09936		20.9956	19.4688	0.429806	0.935525	0.98358	1.03968	1.01371	0.495822	1.49614	0.649228	0.818275	0.325836	0.506785		0.0876573	0.176667	1.02773	14.1958	2.88806	2.53049	1.23884	0.448577	0.0408317	0.288107	1.30604	2.64814	0.296673	0.402093	1.03979	0.442518	0.480541	2.99664	27.8418	19.0349	2.08423	2.85	0.582074	2.81247	2.53969	19.6664	0.12945	0.378833	3.51251	28.3456	3.10701
ENSG00000029534.19	ANK1	25.4743	40.1717		85.1607	88.8065	1.45532	4.39478	1.24308	6.24164	7.43646	1.19416	4.68192	0.913415	1.0481	2.38409	8.67877		0.647044	0.472866	0.930038	4.07039	1.20773	1.98028	0.298655	0.379584	0.343094	4.47462	0.289927	0.246619	0.281584	0.213135	0.541208	0.273169	0.381806	0.314813	7.8852	9.70194	0.279489	0.280883	0.070753	0.71325	0.413992	36.9679	0.678074	0.257295	0.161895	1.57229	0.627392
ENSG00000090539.15	CHRD	22.259	8.52938		242.64	232.01	11.4647	20.033	5.37574	45.7168	36.2422	12.752	3.09201	7.27914	4.93974	4.22374	3.6055		27.0368	26.5224	22.5395	18.732	34.1914	22.9155	17.6939	27.5513	0.621738	0.0683083	94.7987	130.685	18.0206	10.5505	26.7294	5.78008	23.0132	45.6454	13.9547	7.28182	29.6853	30.0187	130.748	18.8558	8.88598	4.89014	31.2303	50.5526	16.1352	14.9324	23.753
ENSG00000101333.16	PLCB4	18.3045	5.93307		57.4134	71.4361	1.80338	2.6067	2.86567	4.5723	4.74327	1.71989	6.53269	1.64647	2.55625	2.54977	4.34165		10.743	9.0125	0.769409	11.3205	12.891	22.6058	13.5475	12.0379	13.9303	0.0529622	10.1285	10.2839	10.9716	12.3515	22.2761	3.37802	19.4851	15.0895	7.055	4.78931	2.17831	3.18039	0.122804	8.92789	22.2349	1.88236	26.3247	3.1776	0.756066	17.5675	12.2707
ENSG00000082126.17	MPP4	16.0021	7.91297		2.96224	3.26911	0.128953	0.243142	0.12658	0.374106	0.35216	0.224698	0.20626	0.254364	0.10463	0.120126	0.0902408		0.256243	0.176484	0.512799	0.416176	0.183807	0.201048	0.183991	0.267289	4.40062	0.0566256	1.19142	0.793646	0.10841	0.0614806	0.155046	0.0398097	0.134271	0.201462	0.0515272	0.0442219	0.0688684	0.178982	0.0686819	0.198932	0.0883916	0.065131	0.249887	0.235624	0.0369845	0.509776	0.241977
ENSG00000116035.2	VAX2	14.6421	18.3292		19.2522	22.8746	2.12491	1.39718	0.809039	0.973925	0.959685	1.50478	2.35622	0.836548	0.737948	1.44846	0.973772		1.09941	2.51137	0.571992	0.606592	1.71048	0.789723	0.901725	2.11723	2.74668	0	0.972043	2.37817	1.07813	0.50432	0.761679	0.574673	1.04832	1.65089	0.592787	0.214065	0.459089	0.378733	0.0445436	1.06072	0.614331	0.350657	1.7276	1.67245	0.91086	1.83372	1.47588
ENSG00000095752.6	IL11	14.2468	15.4879		9.19883	8.8231	0.379917	0.614284	0.550758	0.83407	0.859949	0.366548	1.76	0.643427	0.486252	0.350434	0.445202		0.034133	0.333217	0.0882455	0.0858154	0.133396	0.0464444	0.311861	0.226379	4.73045	0.0967468	0.0711673	0.376044	0.521283	0.472546	0.145561	0.597091	0.146619	0.200646	0.0587548	0.0313806	0.817863	2.58011	0.0405789	0.514315	0.311883	0.0184578	0.837472	0.226754	0.0998198	2.43838	0.906515
ENSG00000101638.13	ST8SIA5	13.8652	142.178		51.0701	47.0945	2.77019	7.69674	1.4734	13.3422	13.3033	4.01027	1.70357	1.48167	1.22767	1.87564	1.29092		0.0476405	0.0449104	7.55335	0.0625484	0.0549883	0.0422881	0.0572164	0.0481966	0.0197052	0.103988	0.0799192	0.104026	0.0778256	0.0520818	0.0718178	0.020963	0.0715635	0.0612054	1.20342	0.837204	0.49984	0.595166	0.0221754	0.048829	0.0569986	0.747988	0.060834	0.107379	0.0324445	0.652468	0.154662
ENSG00000153233.12	PTPRR	9.34014	64.3616		21.6207	22.149	2.44265	4.21239	1.61741	4.87648	5.9696	1.37198	2.60386	3.03772	1.23642	0.346372	0.309761		0.171923	0.132103	0.056624	0.198525	0.356532	0.369976	0.476238	0.166928	0.112702	0.0109935	0.0980687	0.130967	0.992141	1.52648	0.259021	0.0227815	0.3138	0.193677	0.212034	0.0973413	0.0631035	0.0973404	0.00949554	0.334866	0.0489465	0.0601551	0.210184	0.0835432	0.0430079	0.714624	0.0826302
ENSG00000126217.20	MCF2L	9.15452	13.8968		109.786	100.102	9.49297	14.3364	8.99219	24.1796	22.1861	9.72357	13.4606	9.03608	7.7183	13.8758	11.1034		18.5435	17.5285	1.52347	4.57965	5.27496	6.42771	7.54734	18.2469	0.0793792	0.259535	9.06156	9.96639	4.75001	6.71595	7.67969	4.90562	8.2226	9.30227	4.76733	7.06415	5.19897	4.69148	1.57882	11.1997	12.231	3.14899	8.00898	2.33726	3.01245	32.7394	11.4845
ENSG00000160097.16	FNDC5	8.42251	15.8847		109.141	92.0074	9.56092	15.5762	14.7463	25.2533	25.4602	9.69976	12.2549	14.3222	11.3554	4.99666	11.6099		1.00978	1.03856	19.2268	9.26711	3.72073	1.37126	1.45525	1.52315	0.259735	0.534707	3.84008	4.404	1.87598	0.910732	12.377	0.611101	11.0472	8.10798	28.9164	22.864	0.83748	1.99216	4.13719	1.2552	8.78641	68.9299	1.48311	11.3334	0.33857	12.5702	3.63843
ENSG00000178172.6	SPINK6	#DIV/0!	59.8485		13.0273	3.40178	0	0	0	0	0	0	0	0	0	0	0		0.173303	0.237244	0.159769	0	0.222079	0.100884	0	0.163899	0.0478848	0	0.103019	0	0.339261	0.0313437	0	0.48814	0	0	0.0902408	0	0	0	0	0.132415	4.55653	0	0	0	0	0	0.0830311
ENSG00000132677.12	RHBG	1232.86	16.2024		51.6135	52.8801	0.0310007	0.0407061	0.0256152	0.0378679	0.0382654	0.0305392	0.0372068	0.0235143	0.0225237	0.133461	0.0358171		0	0	1.32017	0	0.0149604	0	0.599908	0.0452612	0	0.0315469	0.0535816	0.010918	0	0.0139163	0	4.20899	0.0124403	0.0153224	0.025845	0.0125625	32.6976	23.0574	3.1417	0.036418	0.0942117	0	0	35.4684	0.565087	0.109051	0.155919
ENSG00000086570.12	FAT2	689.007	58.1679		223.867	179.781	0.0624588	0.0945819	0.356097	0.187595	0.153036	0.0834591	0.216726	1.6472	0.146738	0.376968	0.11186		0.378688	0.176549	0.105284	0.265715	0.24262	0.19953	1.0073	0.88906	0.139176	0.211763	0.45768	0.282457	0.159512	0.179481	0.172845	38.2088	0.162444	0.410282	0.0812329	0.0434684	0.120031	0.225987	0.0384466	0.297804	3.62795	0.168111	0.617677	0.208252	0.0904044	0.556624	3.2408
ENSG00000171219.8	CDC42BPG	379.706	6.41431		67.997	69.323	0.161775	0.105944	0.205529	0.128007	0.0994568	0.196626	0.215358	0.186364	0.145489	0.346519	0.127718		0.541279	0.947425	7.61615	0.401551	0.502143	0.368116	2.6627	8.12112	0.126087	0.405077	1.57048	1.98595	0.447816	12.7611	0.404893	45.0193	0.380429	3.39196	0.459165	0.162702	5.16065	12.4903	0.696368	18.7675	31.7527	0.0979666	0.710086	5.28289	10.9045	25.7179	18.3018
ENSG00000174788.9	PCP2	379.243	9.96568		90.4335	60.653	0.11042	0.11124	0.15852	0.152157	0.148256	0.121811	0.149154	0.18364	0.130335	1.08367	0.187535		0.290864	0.495236	1.74173	0.203252	0.222157	0.102626	0.692995	5.26688	0.0553386	2.8128	0.474429	0.463032	0.185695	0.744487	0.198154	2.40527	0.214794	2.43122	0.194437	0.781203	6.48555	10.1084	1.92669	3.62779	9.37391	0.0398305	0.335671	0.253344	3.39309	2.67701	9.64246
ENSG00000139899.10	CBLN3	274.155	103.602		751.338	859.592	2.28978	2.98349	2.0675	3.37916	3.20711	1.95741	3.49767	2.07682	1.94038	4.76145	2.62396		9.6595	8.69448	19.1808	6.88749	9.72875	7.22155	7.58572	7.02446	17.4461	12.7403	7.50792	8.11594	6.09338	3.96767	7.09364	3.36052	6.45562	7.81421	2.63024	1.20393	3.59938	4.14939	2.01577	7.51458	5.46884	0.739405	11.9356	18.2425	1.06032	6.92804	6.99859
ENSG00000169174.10	PCSK9	265.907	16.3913		22.1456	23.4952	0.03456	0.0677279	0.027266	0.129872	0.11809	0.0373134	0.129429	0.224843	0.0213276	0.117227	0.0550501		0.070863	0.267342	0.13387	0.196964	0.0835787	0.101842	0.149421	0.0964767	0.539459	0.01256	0.151602	0.127535	0.0695319	1.62535	0.124368	4.9358	0.155779	0.190678	0.0238418	0.0114516	0.13067	0.278286	25.5472	6.73579	0.103873	0.0113906	1.81838	0.0733842	2.67837	0.0886118	0.0963211
ENSG00000197467.13	COL13A1	213.655	18.57		80.7369	83.9423	0.217119	0.373777	0.368018	0.652493	0.560803	0.236859	0.410852	0.280098	0.357202	0.67179	0.302324		1.48358	0.86997	1.43982	30.6191	9.90066	22.8197	3.73275	0.97109	6.10168	0.0231006	6.54759	7.63993	4.53471	3.88918	2.42864	1.71883	3.01044	4.09903	2.64144	0.392474	1.06906	1.30116	0.230893	12.9999	0.490714	0.551298	0.587724	1.18756	0.573673	3.54741	11.483
ENSG00000273706.4	LHX1	168.465	122.473		55.1082	55.9855	0.0278389	0.0437328	0.0354609	0.0592846	0.0615349	0.0564477	1.79495	0.0678231	0.0258448	0.644271	0.513301		0	0	0	0	0	0	0	0	0	0.0626702	0.0135044	0	0	0	0	0	0	0.252743	0	0	8.92517	8.88089	0	0	0	0	0	0	0	0.0190876	0
ENSG00000138675.16	FGF5	133.737	9.02964		5.82121	5.80729	0.0101786	0.0784587	0.00345674	0.185318	0.231942	0.0317056	0.0346647	0.00816335	0	0.0263375	0.0103653		0.0110779	0.0121427	0	0.0204234	0.0622635	0.0123168	0.024352	0.0110159	21.2648	0.00537177	0.0359639	0.0271061	0.963276	0.160058	1.30035	0.00847191	1.52102	0.0365695	0	0.0469535	0.0992895	0.0948937	0	0	0	0.00904264	0.450873	0.0217982	0	0.052651	0.0164774
ENSG00000234965.2	SHISA8	116.7	149.504		137.659	135.694	1.08205	2.94759	0.399072	3.71227	2.94331	1.2991	0.498962	0.293422	0.503127	1.34925	0.480059		0.0359238	0.0371	14.7212	0.0324955	0.0618908	0.0325863	0.0723956	0.0609752	0	8.79753	0	0.0466825	0.0293536	0.0968173	0.0337557	0.117954	0.0288897	0.187775	0.853763	0.609248	0.339928	0.167179	0.0343786	0.139002	1.20416	0.0467943	0.379957	0.0766555	0	2.05102	0.196487
ENSG00000180660.7	MAB21L1	116.004	30.0848		54.9139	65.7052	0.584921	0.375393	0.327785	0.358172	0.385271	0.426704	0.415168	0.357909	0.269135	0.950689	0.640807		3.933	1.02713	0.385318	1.8799	0.890476	5.90962	1.41391	12.4167	1.78372	0.0230207	0.757955	0.830388	3.94041	1.48865	2.34977	0.28396	2.72804	0.359067	0.639054	0.297727	0.129685	0.19785	0.0419988	0.208614	3.73597	2.39519	11.3085	1.17092	0.0872024	0.647114	1.1637
ENSG00000102924.11	CBLN1	112.912	326.639		709.757	813.656	1.1923	2.8201	3.49792	3.99827	4.96538	0.908153	32.2906	1.89692	2.00108	4.92836	8.35876		6.16237	1.277	0.35149	0.523263	3.71346	0.380763	1.17158	3.29947	0.016287	0.0263659	0.278114	1.25436	0.825423	0.797386	0.435961	0.623165	0.696032	2.07977	2.05913	1.74652	0.160043	0.124134	0.451504	0.14046	0.478263	0.353206	1.47501	1.47454	0.691004	4.56842	0.521387
ENSG00000094796.4	KRT31	109.742	29.1881		59.9888	67.5311	0.0476705	3.22673	0.0366468	1.05867	1.50762	0.0478088	0.122651	0.0681211	0.0318851	0.328457	0.0487628		0.0547516	0.0467659	0.0289881	0.10813	0.14566	0.130396	0	0.103792	0.0260432	0.0381452	0.0660464	0.0563802	0.0429684	0.0227317	0.0432674	8.72871	0.041793	0	0.0355586	0.0215882	0.0425722	0.0104179	0.0211591	0.0448764	0.192443	1.2156	0.118093	0.0594451	0.0185764	0.0277324	0.0567399
ENSG00000111981.4	ULBP1	108.529	11.1023		6.54127	6.73782	0.0631823	0.0953139	0.0162146	0.0901248	0.0914384	0.20419	0.0355394	0.0201213	0.0101469	0.050991	0.0155828		0.0967361	0.224374	0.120754	0.127723	0.157622	0.150183	0.0723031	0.0953965	13.0677	0.24302	0.0670974	0.0693435	0.0653641	0.0506109	0.0466582	0.106187	0.0513338	0.036525	0.211993	0.164111	0.253185	0.397769	0.0231566	3.08252	0.0807856	0.0519943	0.0410604	0.0465217	0.0331232	0.29668	0.0558306
ENSG00000124493.13	GRM4	98.0038	2878.03		286.825	296.494	0.627223	1.34112	7.30624	1.40106	1.71048	0.49027	1.71869	10.0608	4.69675	1.05075	0.264397		0.0175173	0.0207536	0.0163311	0.0135058	0.0139243	0.0163613	0.00999796	0.0376607	0.0322285	0.0510226	0.212311	0.229501	0.0503657	0.0570332	0.0235072	0.0232065	0.0218304	0.0947795	0.0100441	0.00937457	0.0188868	0.0199757	0.0102553	0.0424184	0.107816	0.0179139	0.0264312	0.0691348	0.186273	0.429348	0.0974163
ENSG00000145536.15	ADAMTS16	75.0958	18.8433		15.3815	14.1184	0.214636	0.584462	0.0422679	0.462736	0.491467	0.324697	0.0869234	0.12723	0.0399955	0.0942772	0.0422933		0.603826	1.67158	0.0323643	0.06345	0.123742	0.101779	0.275798	0.405827	0.0901447	0.220044	0.447262	0.765159	0.193866	0.158768	0.303725	0.0740516	0.276839	0.616747	0.0229866	0.0201351	2.86341	3.78315	0.0300739	0.140164	0.0964815	0.0283146	1.32498	15.6676	0.859566	0.26576	0.0799008
ENSG00000112139.14	MDGA1	75.0492	65.2975		214.433	187.557	2.29256	2.7251	2.84694	3.69578	3.07787	2.76217	3.37876	2.09575	2.06316	5.23059	2.09942		2.12378	2.56973	1.90286	5.95422	3.94141	4.17876	2.16582	1.7809	0.8826	2.31355	11.8563	9.18938	3.40606	1.79093	3.04165	3.28263	2.8019	2.82583	1.14568	0.712109	0.544506	1.20067	0.224202	3.46817	0.99552	0.26662	6.25907	9.09677	0.241141	6.42436	2.74907
ENSG00000172349.17	IL16	74.1123	6.05477		65.5574	64.2644	0.596326	0.466191	0.798387	0.614583	0.594825	0.674298	1.09461	0.708133	0.519806	2.46199	0.931122		14.1534	13.5786	2.41048	4.21788	10.3425	6.51531	10.8625	12.6935	1.73773	53.9753	10.5809	12.9018	4.35297	5.6077	11.1072	3.97194	8.39827	19.0275	2.3026	1.05763	0.88828	0.942714	1.35866	22.0199	8.50369	1.13943	32.9799	5.03401	0.79018	1.48692	4.72458
ENSG00000196739.14	COL27A1	63.3427	6.12481		120.915	110.269	1.88274	1.67266	1.79962	2.28918	1.85555	1.85966	2.50705	1.45962	1.35902	2.16375	2.52935		8.39466	9.12129	8.35467	22.621	16.5799	10.2863	9.54227	12.2049	6.55113	0.163609	145.122	133.792	12.2597	6.68331	8.00894	8.02202	6.47221	30.3926	3.60412	4.17833	16.9802	26.4697	16.8552	10.3	5.70042	1.97146	27.8252	38.8162	9.71873	2.94962	29.6119
ENSG00000110723.11	EXPH5	61.9297	8.6733		26.1049	24.0199	0.280527	0.36189	0.791631	0.544518	0.441207	0.441445	0.347856	0.339235	0.439841	0.39114	0.380475		0.436552	0.22414	0.198279	0.70506	0.229522	0.166354	1.12439	1.53451	0.100546	1.18356	0.345113	0.503581	0.148348	2.8951	0.45511	10.2622	0.329014	1.54772	0.189243	0.0822939	1.60294	1.92913	2.33509	4.43955	3.13308	0.0488935	2.11355	0.444938	0.692503	1.15527	2.57109
ENSG00000144488.14	ESPNL	61.6518	8.5034		7.19892	6.28392	0.145765	0.0649507	0.150426	0.0948512	0.0606327	0.076004	0.130998	0.200271	0.0926802	0.144504	0.101442		0.459833	0.305945	0.236837	0.435282	0.210126	0.263285	0.673699	0.528187	2.14022	1.79768	1.08737	0.847547	0.815574	0.515821	0.627656	0.222158	0.492796	1.92604	0.374187	0.0956713	0.176326	0.426529	0.640426	0.332269	0.0914362	0.151766	0.44412	3.10953	0.0686781	3.45161	0.778068
ENSG00000105641.3	SLC5A5	57.8269	8.40802		3.84755	3.27048	0.0351807	0.0560468	0.0370597	0.106092	0.0838414	0.0807844	0.0650291	0.0504855	0.027637	0.174265	0.0550269		0.0408689	0.0361081	0.0127417	0.0422756	0.0449596	0.0419211	0.0598789	0.0363136	0.00985685	0.239361	0.10317	0.0758664	0.0272288	0.0484113	0.0316559	0.0436593	0.029337	0.0749337	0.0127601	0.00684143	0.0150608	0.0237778	0.0133656	0.144738	4.63098	0.00830487	0.0364379	0.0299413	0.0155542	0.0587539	0.0694262
ENSG00000043355.11	ZIC2	56.4834	1747.56		248.344	298.061	4.89441	8.48791	1.79026	9.40279	7.36354	6.21008	3.29797	2.2172	2.92494	4.12188	2.65943		0.056216	0.0551567	0.0218806	0.0301535	0.026544	0.038011	0.0180028	0.0880663	0.0246135	0.0124681	0.0163659	0	0.0294278	0.0414727	0.0322027	0.12689	0.030133	0.0388339	0	0	0.013134	0.0298566	0.019876	0.0328489	0.0208432	0.00897066	0.0253	0.0326497	0.0159472	0.304417	0.0281038
ENSG00000165588.16	OTX2	54.5922	1162.92		23.7511	24.4345	0.0239195	0.0179598	0.0669457	0	0	0.106415	1.01169	0.110061	0.0568811	0.098466	2.8583		0	0	0	0	0	0	0	0	0	0	0	0	0	0	0	0	0	0	0	0	0	0	0	0	0	0	0	0	0	0.148644	0
ENSG00000146054.17	TRIM7	53.0524	10.3505		37.7272	29.3388	0.425469	0.785492	0.732801	1.68623	1.21881	0.399117	1.24764	0.747966	0.559355	0.543753	0.450906		1.6217	1.0199	0.721709	3.43424	3.29451	2.32773	1.88907	1.61545	1.90464	1.12275	3.23149	2.05649	0.941501	1.03873	1.95933	15.0576	1.66888	2.04738	2.4564	1.82291	0.984009	1.69027	0.157648	2.46222	1.94256	15.8084	3.3573	1.37631	1.16254	4.47661	2.55998
ENSG00000139800.8	ZIC5	49.7023	406.021		58.4524	53.9231	1.54562	2.35855	0.591606	2.54242	1.8234	1.56994	0.764374	0.630358	0.70088	1.16085	0.614924		0.0156807	0.00898056	0	0	0	0	0	0.0179786	0	0	0	0	0	0	0	0	0	0	0	0	0	0.0314864	0	0	0	0	0	0	0	0.144135	0
ENSG00000100362.12	PVALB	46.3337	287.544		640.03	417.526	1.10071	13.6536	1.07885	36.168	65.4067	4.82107	1.27115	0.524502	3.56613	24.6772	22.035		0.127866	0.208479	0.327771	0.108127	0.115292	0.0356986	1.37029	0.199646	0	0.0325587	0	0.0488843	0.0747748	0.105678	0.12527	0.0607344	0.112237	0	0.0389079	0.0221378	25.8323	52.581	0.671218	0.81852	0.352549	0.756975	0.154557	0.194529	0.0299954	0.482233	0.209156
ENSG00000242866.9	STRC	45.7356	48.1438		15.1652	12.3421	0.122155	0.339437	0.405532	1.21337	0.851011	0.145175	0.281232	0.569657	0.309509	0.191419	0.100715		0.117403	0.0714109	0.129664	0.140665	0.0823708	0.0805226	0.133836	0.220331	0.0128299	0.0916326	0.231558	0.425212	0.116084	0.145644	0.0969174	0.107867	0.0910174	0.367334	0.0287932	0.00986	0.102108	0.122786	0.0655901	0.094755	0.358851	0.04564	0.225176	0.333578	0.0280738	1.03128	0.433586
ENSG00000135083.14	CCNJL	45.1992	10.6381		34.2104	38.4604	0.603297	0.908105	0.86366	0.916849	0.862411	0.893434	0.719176	0.885976	0.729915	0.472662	0.630177		0.560676	0.753847	3.0234	1.29684	0.836802	0.697239	2.032	1.01014	0.127351	0.1156	3.17081	3.95993	0.9547	4.84003	0.93219	0.768625	0.896695	1.59627	1.93938	2.10392	1.35873	3.22186	0.2843	8.65299	3.03518	0.0884994	1.03621	6.88707	0.0926819	4.29487	1.69815
ENSG00000135549.14	PKIB	45.1071	50.2238		123.45	194.796	2.53848	2.91366	1.19168	1.77102	2.95007	1.77608	4.90043	3.51013	1.10974	2.30642	4.17148		0.46756	0.754214	0.70016	0.50065	0.7349	0.504503	0.198293	2.50234	0.17084	0.234995	1.0571	2.23354	0.484649	20.8216	0.242451	1.58301	0.221265	0.602419	0.137429	0.065866	0.822226	0.859919	0.6764	1.25473	4.94222	0.135086	1.32242	0.263439	1.58116	16.4715	3.76945
ENSG00000260903.2	XKR7	43.9935	121.579		31.834	27.9962	0.52998	1.2161	0.56563	1.83643	1.80893	0.411896	1.04162	0.74103	0.437785	0.187899	0.295194		0.0095001	0.00886058	0.014332	0.00763144	0.0159766	0.00527801	0.0128035	0.0120848	0.00405803	0.0116506	0.00605838	0.0151809	0.0585261	0.0446792	0.0140079	0.0112249	0.0146767	0.0154474	0.00473758	0.00358803	0.00781146	0.0286175	0.00550731	0.0336204	0.00976107	0.0044497	0.0649334	0.00828142	0.102106	8.72569	0.0197315
ENSG00000038295.7	TLL1	39.4329	7.07276		11.3658	13.8966	0.222847	0.257646	0.227194	0.311567	0.449956	0.358883	0.40927	0.423271	0.143508	0.219993	0.169748		5.47396	4.14582	0.588641	1.01504	2.535	0.703382	2.22161	4.64563	0.655635	0.00821492	3.28775	2.6449	1.55875	1.43278	2.3496	0.880451	2.62966	2.33575	0.524237	0.111024	0.717535	0.77924	0.0369491	1.7842	1.21906	0.21696	2.66811	0.357867	0.462243	1.32215	1.49813
ENSG00000140873.15	ADAMTS18	38.4186	85.8001		24.5056	29.0739	0.284032	0.139024	0.35942	0.149811	0.113896	0.648333	0.794236	0.282488	0.264557	2.9171	0.575492		2.23098	2.12817	0.0163979	0.0303545	0.0693242	0.0323605	0.0536753	1.94197	0.0140024	0.00451855	0.36017	0.971777	0.0165128	0.0634256	0.0143485	0.0205382	0.0167326	0.0730817	0.0104414	0	0.22482	0.130828	0	0.0345165	0.0522537	0.0143396	0.151419	0.109574	0.0237016	1.59543	0.0865993
ENSG00000172794.19	RAB37	38.3831	36.1006		133.397	137.903	1.61257	5.26919	1.31101	10.072	10.7184	2.94885	4.35606	1.14693	1.24279	3.58454	2.56378		1.76547	1.53034	1.60233	1.81533	1.34396	0.5968	5.03686	1.36254	0.197372	8.11685	2.92621	2.21846	1.43161	3.98058	3.48773	1.49657	2.81226	2.13811	0.888564	0.790321	1.65749	1.18585	6.61248	6.67689	1.56062	0.359555	3.16543	0.432221	0.616069	1.16206	5.82901
ENSG00000189056.13	RELN	36.2387	48.1808		101.072	161.248	2.69147	3.58656	3.34628	3.2053	3.53452	2.40844	3.78833	3.53879	1.95471	2.02136	1.0202		1.15638	1.88987	0.630237	0.193351	1.83853	0.542865	1.45984	2.09722	0.495914	0.0171617	1.94879	1.48576	1.40514	0.813586	2.38098	0.535971	2.2336	3.2184	1.48029	0.162768	0.148386	0.714003	3.56565	1.1397	1.38794	0.161617	38.5519	0.543164	0.0926283	0.817666	1.00508
ENSG00000177084.16	POLE	36.1245	5.66052		76.88	62.3924	1.65315	2.36813	2.28495	5.7132	4.05981	2.15614	1.70155	2.61404	1.36885	1.76274	1.31259		12.0916	8.64088	4.95878	13.1854	10.6773	13.817	14.2246	12.1322	10.0676	30.4649	16.5039	17.1643	13.4092	12.8024	14.3383	12.0891	13.4188	15.6674	4.82762	3.04506	3.24944	4.35603	7.75153	11.9405	10.5812	6.79175	14.5528	17.4889	5.23301	6.33011	16.5926
ENSG00000011105.12	TSPAN9	35.912	6.76104		177.972	183.122	3.43925	5.08686	6.08632	8.1427	8.0607	3.085	4.4231	5.49091	6.04282	3.92955	3.91331		32.2842	28.0663	12.3761	36.4089	31.3413	35.4744	26.6279	31.9091	11.3372	0.424587	43.4692	49.4232	22.4647	12.8146	22.7443	14.7256	19.7546	36.8649	44.9123	40.295	31.7342	34.7455	25.2597	48.2531	19.5581	5.29031	27.0699	50.6554	5.73172	10.4102	38.3701
ENSG00000143858.11	SYT2	33.7135	90.8079		57.2107	71.1851	0.179801	0.914471	3.41053	2.00235	5.03998	0.238081	0.698089	2.56725	2.35144	0.960916	0.609122		0.406138	0.334436	0.165266	1.69382	1.26831	1.33816	0.971661	0.449183	0.102518	0.0512108	1.00271	0.945378	1.2464	0.579584	0.98333	0.217227	0.883654	1.0071	0.537678	0.373592	0.16905	0.162562	0.112896	0.363081	0.510501	0.309348	0.891685	1.4908	0.10895	0.288726	0.749293
ENSG00000082293.12	COL19A1	33.2654	6.87265		2.94275	1.34158	0.0637285	0.108613	0.120599	0.181768	0.176005	0.0591872	0.129386	0.11018	0.0624632	0.0192578	0.0352093		0.0129494	0.0137356	0.0069235	0.0599087	0.172456	0.955584	2.42906	0.0178429	0.0136265	6.54905	0.038189	0.0242539	0.138506	0.117191	1.45179	0.0276285	1.07895	0.0284735	0.522328	0.154195	0.111326	0.0780238	0.0178365	0.054084	0.129669	0.115075	0.148857	0.0124164	0.10117	0.831683	0.0646659
ENSG00000127588.4	GNG13	32.8448	1605.88		133.729	47.2303	1.28531	10.7589	0.197048	20.2308	24.5139	0.212843	1.43501	0.29425	0.311226	1.01267	0.694284		0	0	0	0	0	0	0	0	0	0.098981	0	0	0	0.648328	0	0	0	0	0	0	0	0.0347604	0	0	0	0	0	0	0	0.223617	0.0998755
ENSG00000156925.11	ZIC3	32.5097	608.054		27.5646	27.0974	0.541561	0.560451	0.937191	0.965466	0.710822	0.727234	1.2559	0.68607	0.869755	1.14755	1.04236		0.00823501	0	0	0	0	0	0	0	0	0	0	0	0	0	0	0	0	0	0	0	0	0	0	0	0	0	0	0	0	1.10136	0
ENSG00000177943.13	MAMDC4	31.9293	9.42933		99.9446	75.1114	2.71702	2.99028	3.30158	5.65343	3.48205	2.74909	3.71821	3.2938	2.50347	4.00779	2.53858		3.46853	6.16392	5.52749	8.68615	8.14693	5.92604	7.27112	5.75713	4.02185	7.49487	10.3263	15.672	8.82152	15.8725	7.09767	6.10848	7.67192	10.7215	4.92995	5.2898	8.0733	14.0809	17.1531	10.8195	8.21211	2.32049	9.32356	10.0416	6.71405	46.1049	22.6792
ENSG00000215788.9	TNFRSF25	31.4854	17.1451		406.454	384.482	9.38052	18.1073	11.4992	44.0215	29.4668	13.9645	11.2051	17.7113	8.13941	5.50155	4.11721		14.9642	17.1306	12.9233	13.6022	12.2726	3.46692	12.6522	17.5929	1.87153	0.407381	30.7905	33.8471	10.0005	22.571	10.482	39.0519	10.2633	24.8541	6.42197	8.55766	9.75513	10.4066	2.99274	14.8456	14.5194	2.00371	60.4432	15.5263	2.11763	124.277	25.6807
ENSG00000105219.8	CNTD2	29.4178	24.1811		29.368	27.8653	1.13333	0.97073	0.860525	1.28035	1.11411	0.989713	1.17635	1.25284	0.880487	0.760011	0.844971		1.05777	0.952691	0.840542	0.417832	0.476122	0.394014	0.696909	1.1449	0.28716	0.0898741	1.16897	1.23023	0.69259	0.384983	0.494422	0.163778	0.474501	1.18851	0.239487	0.103304	0.78234	13.5151	2.85863	0.524529	0.224741	0.250431	0.540607	1.23858	0.0716287	6.85754	1.63204
ENSG00000161647.18	MPP3	29.326	9.56625		78.4649	83.3613	2.72041	2.34473	1.84438	3.18056	3.21107	2.32206	4.64724	2.75855	1.60055	3.24655	2.06051		13.118	10.4343	2.27101	14.3163	10.0948	7.81948	7.13802	12.6669	9.57119	0.0260359	11.3834	10.8815	8.17881	4.07411	7.63636	6.59754	6.96445	11.3841	27.6626	18.7606	2.90659	4.78447	0.783968	19.9834	4.07462	0.762153	9.71589	5.45173	4.06714	5.69808	13.0934
ENSG00000175262.14	C1orf127	27.1571	11.7097		4.27013	2.37628	0.0340222	0.0657013	0.325039	0.0741081	0.0810791	0.0366531	0.0992833	0.253501	0.274457	0.122661	0.279985		0.295228	0.207143	0.138122	0.129766	0.247403	0.0523113	0.0728934	0.133618	0	0.760611	0.0703012	0.130894	0.124576	0.29543	0.114859	0.0518601	0.0991278	0.0969831	0.153327	0.272198	0.0447585	0.0428465	0.0507405	0.382309	0.199774	4.1077	0.345306	0.0814676	1.93889	0.360668	0.146445
ENSG00000135502.17	SLC26A10	27.1283	9.07459		99.6633	82.832	2.49012	4.87627	3.64565	10.9487	7.95649	3.76259	4.06219	4.09131	2.80452	1.31611	1.73252		8.51532	7.16002	2.23716	30.9979	33.137	41.1609	15.7171	8.32023	1.07541	0.387963	19.2996	19.3198	30.5052	9.05812	27.874	2.53841	27.207	21.5315	3.66915	4.20972	1.52363	3.67222	0.580967	5.86387	3.0302	1.35794	20.5673	13.0107	0.466812	6.87312	17.2663
ENSG00000168071.21	CCDC88B	27.0887	9.7152		105.746	100.641	3.17761	2.80777	3.54981	4.4079	3.77158	3.6877	4.00902	3.90657	2.99823	7.15269	3.97593		5.20255	6.3691	4.4151	4.50893	5.19095	2.00633	8.35788	4.39357	0.36996	55.7683	4.55815	7.57095	4.83375	13.11	6.17207	9.17713	5.53202	7.87657	2.5643	1.32381	2.27494	3.04659	2.21062	24.0794	12.6497	0.606672	6.31926	3.70534	1.38875	4.56323	6.79474
ENSG00000065717.14	TLE2	26.9	8.93916		492.941	443.08	18.8863	20.7116	8.46709	29.9858	23.155	13.891	25.7089	8.99657	6.41193	43.2736	13.7474		54.0927	43.9353	35.8406	44.5051	48.4596	18.8046	100.319	56.1404	8.99653	0.343154	82.4698	87.8379	79.1759	44.3161	56.5164	15.5251	54.2329	117.335	56.4305	24.6662	35.1894	60.7515	9.13204	71.8072	80.8147	32.3938	204.87	46.5367	19.223	39.8811	91.8278
ENSG00000141837.19	CACNA1A	26.7737	322.201		304.843	275.04	9.41832	13.4005	13.7271	25.2534	21.8917	8.11928	9.96381	15.1854	10.6054	5.95075	5.59679		0.975896	0.949497	0.30137	0.444144	0.446825	1.74263	0.478747	0.891935	1.37017	0.946276	0.817894	0.904873	0.363752	0.641797	0.403131	0.188441	0.344278	3.77615	0.31841	0.190733	0.278626	0.314758	0.0656333	0.246357	0.208267	0.137869	5.15627	0.632484	0.844585	3.92568	0.448537
ENSG00000159023.19	EPB41	26.7045	8.7307		83.2708	91.482	1.15878	1.59431	6.29763	3.24223	3.21658	0.867253	2.83635	4.96411	5.87412	2.21317	2.16002		8.62822	8.85933	8.83226	6.73978	5.94936	5.09653	9.64978	9.71398	1.45197	11.9262	11.0301	11.1557	8.96762	9.84272	5.41044	12.3024	5.69421	7.24064	4.39174	3.32285	5.75531	8.17767	9.39784	13.5252	10.61	6.72923	3.84101	13.7088	6.59377	8.65442	10.5913
ENSG00000078900.14	TP73	26.3337	7.61719		11.9247	10.9553	0.443724	0.275503	0.3594	0.263672	0.2459	0.727147	0.575852	0.250265	0.247488	0.956718	0.446307		0.0680621	0.0786587	0.0600037	0.115306	0.123468	0.0762652	0.199639	0.745385	0.0857223	17.5805	0.393654	0.386489	0.0936773	0.169016	0.0783509	5.47928	0.0729546	1.5776	0.0755235	0.0573745	0.0866268	0.146996	0.0906901	0.795273	4.36077	0.180671	0.352562	0.332293	0.196565	0.537134	4.68097
ENSG00000125966.9	MMP24	25.9706	89.3538		131.193	112.898	3.92489	7.1328	5.22581	10.9887	10.2041	3.71734	6.15401	7.20924	3.5892	1.32319	2.03532		0.720387	3.17235	0.911944	1.51331	0.67687	0.506849	0.786937	1.07967	0.708413	0.448987	1.23635	1.7253	1.27252	0.772954	1.02257	0.416732	1.44428	1.68598	0.307757	0.169132	7.07339	2.52816	0.307104	5.80101	0.907942	0.187325	0.898334	0.91364	2.60802	6.75867	2.07893
ENSG00000182379.9	NXPH4	25.0264	14.8271		30.5462	27.6168	1.40184	1.94771	0.723571	1.51989	1.70967	0.891287	2.46679	0.396792	0.757413	1.04708	0.863422		0.788725	1.82128	0.144644	1.10423	1.53483	1.69267	0.0909564	0.728992	6.06273	0.516187	0.185339	0.179531	0.0862946	0.116185	0.110743	2.90461	0.102121	0.220876	0.358101	0.926139	0.317145	0.953247	0.164804	0.423639	4.48218	0.102263	0.318353	0.115717	0.747052	0.489312	3.45361
ENSG00000137877.9	SPTBN5	24.9706	6.30182		17.0947	13.9389	0.604379	0.877293	0.334165	1.3724	1.23912	0.642546	0.764761	0.411769	0.324447	1.23426	0.413178		1.46718	1.86565	0.624692	2.08546	2.08521	0.680668	4.15391	2.45585	0.300929	0.168494	1.33791	1.16602	0.932981	0.876031	0.900122	3.32582	0.895942	1.24918	1.47751	1.17233	1.41132	2.38358	1.11628	2.76664	2.98647	0.270254	39.9104	1.81643	0.781145	3.61305	3.84321
ENSG00000075035.9	WSCD2	24.1301	48.2928		146.36	138.265	2.97279	5.84829	9.11873	13.8102	11.6666	5.48947	3.55124	12.8855	6.82888	1.46276	0.830324		0.527336	0.317254	0.315258	4.20855	2.21287	2.61387	2.21286	0.684592	0.0139679	0.0141277	4.45113	5.01149	2.64943	1.20201	14.8912	0.730971	21.4793	2.78007	0.150662	0.0459519	0.610143	0.671886	0.0265077	0.403721	0.236235	0.0648842	7.58643	0.164387	0.241583	1.74425	3.3122
ENSG00000242779.6	ZNF702P	23.8499	9.03297		14.2965	23.347	0.431628	0.686321	0.618425	0.856495	1.36307	0.372814	0.588868	0.714273	0.402433	0.44569	0.370853		1.14263	1.50188	1.93179	2.03405	1.562	1.17421	1.89227	1.56997	2.83319	0.157446	2.66805	2.84558	1.63738	1.52999	1.31743	0.489988	1.34482	2.77963	0.585565	0.396025	1.16537	3.91236	0.0841507	1.46289	1.94718	0.141695	1.41601	2.29838	0.600063	0.516375	5.52481
ENSG00000171680.21	PLEKHG5	22.3923	11.6245		244.848	198.329	8.87054	18.2638	7.85112	35.408	27.3265	15.5113	7.1427	13.0507	4.46079	3.66836	3.19904		18.3114	16.894	13.9746	15.9236	12.4941	4.55963	11.2921	18.635	3.55456	0.547631	23.6223	25.9906	10.4711	10.9997	11.8972	31.4708	11.513	17.9666	7.45859	7.96684	5.3447	6.08628	1.20543	11.4132	13.1987	2.1389	51.3166	13.9599	2.17119	78.615	16.9854
ENSG00000167619.11	TMEM145	22.2324	238.888		347.821	299.33	13.2524	19.094	15.6129	37.9091	28.9853	9.96399	21.8391	14.5933	14.2935	9.98319	8.83018		0.184819	0.345025	1.5103	0.0952307	0.182898	0.0727972	0.237533	0.46248	0.337406	0.237456	0.276618	0.608342	1.10756	0.525733	0.395944	0.212172	0.42906	0.393215	0.412046	0.100051	0.22086	0.14196	0.0749067	0.469811	0.596362	0.289716	1.02911	0.647804	1.0877	33.2292	0.635344
ENSG00000123643.12	SLC36A1	22.1754	9.0328		66.4432	58.031	1.92067	2.82386	2.32629	5.59944	6.55308	2.53306	3.13116	2.46462	2.10451	3.50611	2.59921		8.68097	7.13661	5.09476	8.73992	9.05641	5.91323	9.36952	6.4585	10.2499	3.72806	6.47485	7.79176	6.12702	11.1415	6.69613	6.70397	6.42916	6.59275	2.37911	1.45611	3.29243	3.45904	1.60616	9.84899	5.78144	4.03431	19.2453	6.09843	3.68817	6.46381	9.37419
ENSG00000185133.13	INPP5J	21.8817	7.23109		107.567	88.5669	3.35407	7.83042	4.44767	12.146	11.428	5.98213	3.83778	4.13511	3.53108	1.75539	2.85676		0.648902	0.788951	1.72295	4.83378	2.64125	3.15268	4.34757	6.94928	0.199547	0.218302	4.08988	5.86202	5.50941	10.2546	4.10871	2.65455	4.19737	3.23138	18.6564	8.23869	20.7309	19.4415	0.190661	3.38098	14.9526	0.976578	3.24708	2.1248	7.7429	15.6753	9.78086
ENSG00000143847.15	PPFIA4	21.4685	105.309		371.331	349.247	17.2695	23.8637	15.2167	51.0769	44.9436	14.0972	14.4046	23.4793	10.6716	3.95922	5.06042		0.539113	0.674476	0.206057	8.2992	2.64435	2.82998	1.53237	1.0419	5.07869	13.2577	9.08059	7.61764	2.56887	1.222	1.88683	1.7167	1.86386	2.46966	10.5241	7.98104	4.99679	2.80741	0.138694	1.63065	1.61354	11.6642	1.45432	1.71925	0.107299	3.33993	1.76955
ENSG00000081803.15	CADPS2	21.2812	11.5979		121.97	186.498	3.41686	5.17871	2.33335	13.7	21.209	3.91558	7.6022	2.36769	1.82574	3.39758	6.0669		10.0827	10.3357	15.4931	10.1421	11.5359	9.12236	7.03584	13.538	4.78695	0.158325	13.1086	16.0499	5.13115	5.45809	35.5232	2.3285	42.4647	13.8017	4.38947	3.00528	9.25874	12.2934	3.97307	18.4077	19.8697	1.00138	8.0258	9.99453	9.25943	14.4799	14.6902
ENSG00000138606.19	SHF	21.2778	23.6917		133.55	141.005	5.57627	7.98533	6.12161	8.90878	8.54288	4.73124	8.08865	9.50918	4.58238	3.94915	3.67817		3.93706	3.27965	5.47549	8.99068	6.17538	6.32473	7.12232	4.48091	0.859836	3.57127	12.7705	11.8617	9.11745	4.65298	5.69663	1.99071	4.82921	10.0626	2.99829	1.13737	1.13729	2.1793	8.6265	4.09201	3.55054	0.809828	9.74135	16.733	0.504489	5.75204	7.30256
ENSG00000008710.19	PKD1	20.945	12.6245		577.19	484.383	19.2639	36.8664	24.3245	84.6585	58.5572	23.2425	33.4578	28.731	20.2511	15.9061	14.9733		33.4802	27.1824	14.2989	149.96	72.5296	96.0471	55.0255	31.2631	34.6448	13.2222	62.435	58.8843	90.2125	37.1344	93.6022	20.3315	83.57	71.7567	23.3352	18.9771	8.34398	12.0618	8.09047	33.4294	19.4081	40.0098	52.6072	62.48	8.80554	165.565	48.0978
ENSG00000133816.13	MICAL2	20.7563	9.33748		214.609	211.344	7.56968	16.6277	4.23303	37.6616	39.8922	14.0158	4.04272	5.47418	3.36441	6.13776	2.03738		7.14546	9.3109	6.85162	170.252	101.113	96.3741	13.8468	5.88349	24.0626	0.878839	11.1549	16.275	40.1827	27.3771	40.7485	3.90949	54.9881	22.3906	19.9297	8.85862	2.83258	2.41632	4.44261	25.7935	3.65603	6.53256	25.1892	9.84076	4.26623	2.41157	10.8493
ENSG00000154127.9	UBASH3B	20.4201	16.1598		37.3549	47.9982	1.56965	2.39497	1.07414	2.08265	3.22533	1.19748	2.43288	1.71408	0.793994	1.68642	2.20427		1.36797	2.02151	0.90416	1.24149	1.57365	0.775814	2.44615	1.42321	12.0174	1.09133	0.894566	2.02458	1.18176	1.31561	0.568556	1.44987	0.579528	0.806562	0.369907	0.306893	0.573239	1.61451	0.32723	7.22597	0.933772	0.416097	0.800641	0.394617	0.339547	0.547907	1.20662
ENSG00000006468.13	ETV1	19.9075	35.6619		120.078	174.599	7.15257	7.99084	7.64306	5.62749	8.2194	4.657	4.24557	8.33469	4.61182	3.24613	4.21695		1.62086	2.52532	8.77757	4.09733	6.11986	3.26761	1.52939	2.27921	7.04288	0.0222308	1.51565	2.37645	4.06997	1.86329	4.34352	0.913619	5.20207	1.10621	5.84748	4.37078	0.767198	1.11245	1.10602	18.0908	5.5103	0.215655	8.42669	0.723443	0.476816	7.57379	3.05654
ENSG00000197847.12	SLC22A20	19.5326	6.48532		2.87888	2.62466	0.0885062	0.149032	0.203512	0.209415	0.198483	0.0818988	0.172791	0.224628	0.15166	0.107198	0.0961776		0.192054	0.155884	0.0680932	0.443212	0.33282	0.324517	0.682443	0.28109	0.180744	0.166346	0.483201	0.621431	0.407953	0.372342	0.300709	1.60492	0.322636	0.281117	0.0892662	0.0580512	0.278401	0.540055	0.202225	0.434772	0.757612	0.160414	0.309525	0.226361	0.229746	0.544597	1.13672
ENSG00000185155.11	MIXL1	19.5073	9.78599		1.63801	2.2995	0.0913482	0.0512323	0.0550878	0.0584006	0.0636872	0.104261	0.148573	0.0390523	0.0578995	0.124939	0.103612		0	0.125759	0.0167005	0.298183	0.149543	0	0.0559824	0.0427985	0.0488315	1.9491	0.0969704	0.160452	0.026319	0.272809	0	0.0455594	0	0.0633515	0.0344788	0.0163991	0.00797231	0.0339961	0	0.103546	0.309681	0	0.0491557	0.28107	0	0.0652241	0.0842935
ENSG00000002587.9	HS3ST1	19.4674	6.93755		19.8483	23.2309	0.856603	1.01495	0.557274	1.37841	1.82394	0.967515	1.24728	0.462082	0.523062	1.61618	1.12676		1.00694	2.11003	1.34432	0.906252	1.49604	0.596746	3.64686	1.82585	0.00520031	0.749699	3.44009	3.02839	1.10459	1.23342	1.38038	7.15357	1.15944	5.07876	0.867492	0.31431	3.12945	5.08399	0.118751	1.90891	3.22276	0.161229	2.05635	38.5259	0.189109	4.90772	2.14212
ENSG00000003137.8	CYP26B1	19.3969	6.12236		55.9813	65.3289	4.0217	4.12586	1.61407	5.70251	8.18832	1.62938	2.16037	2.22675	1.20449	0.842464	2.84759		35.6353	26.5767	3.87061	10.8736	9.1306	5.29238	4.654	16.6775	0.524463	0.026214	4.20132	6.54741	4.02476	2.83675	2.44531	3.7497	1.948	5.42343	5.41312	0.73169	6.18195	3.13012	0.296041	3.4997	12.325	1.76083	18.9396	6.27776	0.285032	13.1794	3.50764
ENSG00000167434.9	CA4	19.0152	8.50815		103.165	110.334	4.32978	7.1914	4.41868	14.9226	13.0746	5.32854	3.83506	2.46782	5.21454	3.4822	4.91131		33.9954	54.1256	0.452809	1.33189	4.01432	1.19955	4.37707	47.5008	0.045292	0.434169	4.46825	2.92137	2.62487	27.7356	4.36951	0.501134	4.50952	3.97963	4.11238	9.74304	18.3867	16.3461	0.16907	70.9985	2.80837	2.99493	2.07563	3.54899	8.43426	12.5266	5.61403
ENSG00000105143.12	SLC1A6	18.6515	89.4895		85.068	35.6386	2.64395	5.01449	7.49469	4.1312	6.27883	3.58852	4.05616	9.71248	4.89232	0.867727	1.06001		0.0122138	0.00933194	0.00770096	0.0135111	0.0128902	0.0183197	0.00615102	0.0184712	0.00740725	0.0131941	0	0.010279	0.0374094	0.018731	0.0114725	0.0270161	0.0115792	0.0207481	0.00614925	0.00523497	0.0236364	0.0123369	0.00815894	0.0177202	0.0159332	0.00717966	0.0181942	0.0128364	0.0473631	0.154487	0.0984988
ENSG00000213937.3	CLDN9	18.3366	21.7714		46.4558	44.3132	0.943754	2.18525	3.29294	3.55296	2.75261	1.52343	1.91229	1.97576	3.30698	5.29046	2.15147		0.390277	0.50209	0.203276	0.208049	0.248068	0.0894921	0.360448	0.344229	0.0213367	0.0689112	0.205678	0.394236	0.369732	0.631338	0.344939	0.145826	0.436543	1.0276	0.322289	0.794123	0.341468	1.39926	3.0719	2.20355	0.70919	0.680456	0.359591	0.101636	3.80456	46.6506	0.527216
ENSG00000156299.13	TIAM1	18.3148	34.1373		193.623	271.421	11.1342	10.337	11.633	11.585	14.612	10.0355	8.71784	14.57	8.83894	9.23818	6.60304		5.40998	3.9596	1.80168	0.762591	2.61715	0.819965	5.8182	4.03268	2.87867	0.906845	15.0403	11.7139	3.62437	2.26404	1.86276	25.8197	1.50691	8.48956	2.15993	0.353603	1.6546	1.3782	2.12775	4.08935	1.86035	0.287639	10.837	2.25266	0.574136	8.34638	6.27813
ENSG00000080644.15	CHRNA3	18.2882	9.81259		7.34474	4.05893	0.167493	0.0892673	1.30223	0.05203	0.0645834	0.0450862	0.475156	0.817104	0.709806	0.224993	0.120382		0.0419172	0.0503003	0.38753	0.0713171	0.0919307	0.0175895	0.297306	0.100959	0.0464428	0.284571	0.410029	0.881421	10.4775	4.29168	1.36785	0.130565	1.57418	0.0795115	0.154536	0.0670321	0.0200801	0.110417	0.00571161	0.0891626	0.0791265	0.0946701	0.0660353	0.0876784	0.105919	1.58278	0.291867
ENSG00000003393.14	ALS2	18.2161	12.9164		115.555	126.825	4.44524	6.31968	5.53815	11.3145	11.3338	5.69022	6.48496	6.1773	4.67472	7.58486	5.1866		10.1134	8.58557	5.5386	10.2901	9.76554	9.2319	9.54999	9.43011	15.9472	6.08345	11.1516	12.0242	9.2739	5.8756	8.76385	5.22313	8.60077	11.4029	8.16582	7.13766	5.59097	7.83385	7.19753	11.0118	6.77129	8.13682	18.7931	10.3013	2.93055	14.899	9.0906
ENSG00000157212.18	PAXIP1	18.0902	5.39768		32.051	33.527	1.34702	1.49829	1.9523	2.31653	2.07927	1.48563	1.80225	1.96741	1.61915	2.4362	1.52985		5.76001	4.72281	3.86794	4.52591	5.04739	5.73554	7.10909	6.05555	8.22011	16.0685	8.04234	8.65704	5.63456	4.93564	5.09207	5.48773	5.06551	7.59269	2.39763	1.62601	2.82173	3.67874	2.53402	5.20105	5.40121	3.05861	8.25842	9.27507	2.09842	5.97141	6.54121
ENSG00000170049.9	KCNAB3	17.6804	20.1768		67.5868	61.5762	3.16406	6.38624	2.27538	11.6918	11.3668	2.83836	3.37344	2.25676	2.13994	2.50753	1.91844		1.70761	2.7636	0.741925	0.767251	1.02523	0.363887	1.52226	2.22772	1.64111	2.37212	3.57623	8.86023	1.55887	2.1755	0.842471	1.36363	0.790006	7.37171	0.443107	0.281481	1.71916	3.60973	0.85989	3.03665	1.92124	0.250739	7.19182	4.65263	0.921698	6.72597	5.86041
ENSG00000169330.8	KIAA1024	17.5651	21.4056		15.3217	17.4778	0.658294	1.03124	0.529984	0.736544	0.992669	0.436852	1.31658	0.459286	0.35256	1.99778	0.947548		0.251509	0.286386	9.96247	0.579776	0.601123	0.492365	0.316341	0.397248	1.64128	0.578034	0.732499	0.721823	0.242757	0.329871	0.201449	0.364749	0.197265	0.272013	0.132928	0.0498652	0.160002	0.271205	0.0514812	0.308544	1.27778	0.071767	0.507126	0.393775	1.25411	1.31095	0.698182
ENSG00000187595.15	ZNF385C	17.5527	11.6718		24.7873	14.0476	1.31938	1.60162	1.25674	1.93089	1.80665	0.932143	1.78444	1.35404	1.04699	1.99073	1.02894		1.22371	0.494355	0.103828	0.489152	0.759659	0.918314	1.17088	2.08276	0.0678635	0.507894	1.77309	3.21309	0.954587	0.808324	0.822521	0.546225	0.688077	1.60617	0.322579	0.167466	0.963541	1.92768	0.19049	0.967782	2.00721	1.58483	6.85235	4.72264	1.8115	5.76144	2.50038
ENSG00000237289.9	CKMT1B	17.5498	95.1993		276.95	266.751	9.00706	23.3623	16.4274	43.8013	42.091	11.224	13.8048	17.1701	13.276	4.38757	7.0575		0.0660982	0.608668	0.22257	0.0409984	0.179635	0.0283223	0.474623	0.82655	0.0274791	0.038307	0.0443302	0.0693521	0.338376	17.0827	0.113979	20.0837	0.102764	0.357931	0.131141	0.0265428	1.23997	1.60434	0.0261502	0.258367	11.5324	0.026572	0.0450695	0.076946	0.544629	6.31761	2.75079
ENSG00000089199.9	CHGB	17.1377	11.6978		516.026	778.113	18.3974	31.2715	17.3288	42.8125	81.0148	26.8852	71.5454	24.6328	11.3515	6.91621	11.7625		0.135533	0.234947	61.5283	0.10537	0.140325	0.0895384	0.275739	0.126692	0.597175	0.107725	0.291093	0.936713	3.02674	1.84218	0.972387	0.181544	0.959205	4.24381	31.2078	1.30894	1.27507	6.12612	0.111601	0.230257	1.0568	0.793578	0.39665	12.6819	13.6798	1636.53	1.37612
ENSG00000113240.12	CLK4	16.9831	7.68151		170.08	160.026	7.13053	8.5275	11.0957	14.1879	13.6183	9.47871	8.49757	9.58382	8.78806	14.9794	8.44702		27.2854	18.8144	11.991	23.1314	23.5079	27.6456	23.5465	26.8478	13.3839	14.0708	35.1289	35.3046	24.3985	16.2649	24.0057	13.0924	22.1045	29.9312	9.50672	6.70136	9.87622	13.3037	9.15891	21.0479	20.1046	15.0551	44.8996	34.062	11.7656	19.4163	28.1152
ENSG00000162825.16	NBPF20	16.5784	9.24817		4.35109	4.35126	0.227073	0.266067	0.198742	0.398522	0.366731	0.242695	0.350141	0.26235	0.164291	0.335272	0.211194		0.452197	0.39107	0.429196	0.445628	0.435975	0.366747	0.463486	0.493863	0.877258	0.349465	0.560485	0.791919	0.488772	0.355628	0.554255	0.302064	0.693398	0.718959	0.170835	0.0960204	0.187663	0.248682	0.80024	0.506928	0.418373	0.102161	0.43071	0.632834	0.288473	0.73618	0.579352
ENSG00000185615.15	PDIA2	16.4865	19.4502		557.453	501.053	19.5395	39.6445	15.2814	68.106	44.7773	27.5072	48.4945	21.7504	12.0335	80.9886	28.1107		0.657278	2.56092	0.371629	1.56275	2.13346	1.15845	0.787586	0.868719	0.23698	0.15585	1.64433	1.54156	5.34172	2.73362	2.2558	0.561602	2.02867	1.99455	3.26541	1.27233	0.3266	0.241216	0.253654	1.14989	0.526205	0.339183	6.86095	1.03174	957.597	19.3494	1.68939
ENSG00000171532.4	NEUROD2	16.3237	2788.87		174.452	192.003	12.4005	27.7605	0.190138	32.3495	40.3638	23.9339	0.416595	0.198321	0.158455	1.23001	0.218253		0.0271713	0.0225451	0.0237659	0.0435129	0.0327092	0.0405546	0.0145981	0.0361369	0.0211907	0.0911237	0.036998	0.0436447	0.0275609	0.0327983	0.0293872	0.0209187	0.0224069	0.100696	0.0217826	0.0161555	0.0118882	0.0390743	0.013175	0.0414081	0.0325235	0.0243774	0.0382427	0.0574908	0.0168281	0.0614665	0.033726
ENSG00000187730.8	GABRD	16.2844	773.897		516.964	538.42	20.273	46.398	41.3694	95.2762	104.872	10.6341	3.04091	54.4156	30.5902	1.8261	4.04068		0.462753	0.408157	1.03713	0.449011	0.563388	0.308238	0.239943	0.718814	0.0239123	0.0355514	0.363622	0.26384	0.229995	0.242415	0.32885	0.435623	0.287094	0.320242	0.343545	0.26992	0.291857	0.363888	0.0988729	1.20821	0.407761	0.165086	0.321461	0.204064	0.073932	3.35163	0.315463
ENSG00000165186.11	PTCHD1	16.1761	16.5029		23.1811	22.5699	1.08674	1.85873	1.92891	2.06967	2.19879	0.529593	1.61221	2.03831	1.18059	0.505337	1.39121		0.228924	0.124208	0.0252037	0.325344	1.23615	6.92746	3.15265	0.840358	0.00346186	0.0063687	5.08124	4.09956	11.7985	2.08254	3.71388	0.25686	2.93832	0.486403	0.124409	0.0282883	0.0342715	0.0356832	0.0143409	0.298657	1.54842	0.0896087	0.157622	0.0386235	0.018095	1.53726	2.10067
ENSG00000171246.5	NPTX1	16.1615	160.029		405.929	444.459	26.8296	57.4811	6.21688	86.8841	112.431	20.4869	6.54782	13.4487	4.35342	2.77303	0.602322		0.146595	0.20736	3.27833	0.297905	0.177419	0.528013	0.864659	0.171058	0.380863	0.286219	0.346098	0.393018	54.0603	15.6426	3.2134	0.165783	4.21701	1.22621	0.0459232	0.0311561	0.194414	0.161895	0.0350831	1.6751	0.0808742	0.693608	0.228815	0.255784	0.106334	2.99998	0.914263
ENSG00000139767.8	SRRM4	15.953	420.439		92.9243	90.2424	3.95562	12.4012	2.96717	20.7864	20.9758	3.9704	6.03713	3.51252	2.15766	0.947772	1.32347		0.0310345	0.0246896	0.0362573	0.907326	0.654962	0.636089	0.0338191	0.0204443	0.00875096	0.00828917	0.0491906	0.11113	0.147014	0.0572091	0.0961819	0.0272788	0.0611373	0.0583203	0.409882	0.219438	0.0707332	0.0692324	0.00456185	0.0843998	0.0206077	0.112557	0.0513063	0.0683129	0.00740551	3.18187	0.0872589
ENSG00000198795.10	ZNF521	15.7981	10.9551		83.3277	104.853	4.24232	4.08314	5.78661	4.77382	4.57903	3.20005	5.74941	6.03658	4.09903	9.87589	5.0932		18.1504	11.1535	11.9852	4.21529	6.63226	6.36821	8.89532	15.755	8.74229	0.024224	21.9675	12.84	5.90094	3.50154	6.08162	2.73978	5.19979	13.3497	5.7819	2.32373	1.98574	1.76608	0.264845	6.08571	5.28097	1.73721	12.3254	19.3168	0.450698	10.7112	3.32403
ENSG00000215045.8	GRID2IP	15.7419	12.8762		4.5358	1.61914	0.172582	0.250664	0.40159	0.391371	0.340165	0.163304	0.309269	0.197501	0.396255	0.490274	0.159746		0.0985049	0.0820993	0.665001	0.300813	0.154988	0.141449	0.149358	0.339706	0.021465	0.164388	0.333367	0.451879	0.0905661	0.316163	0.092127	0.643211	0.0807568	0.285205	0.060644	0.0186213	0.184017	0.365858	0.0276413	0.274601	0.628085	0.0144134	0.213268	0.399821	0.422838	1.87858	0.672457
ENSG00000251664.3	PCDHA12	15.7215	9.40135		2.00889	2.46718	0.102081	0.171529	0.129446	0.21787	0.343487	0.082087	0.0801168	0.124898	0.0687976	0.131826	0.0435263		0.0463194	0.257404	0.164142	0.049086	0.0763324	0.0293309	0.0472361	0.164015	0	0.0148237	0.117714	0.413719	0.113918	0.0605917	0.155465	0	0.240585	0.0715529	0.0226781	0	0.20594	0.0975443	0.0200284	0.600777	0.440381	0	1.01662	0.137449	0.237637	0.881333	0.0666427
ENSG00000204677.10	FAM153C	15.5474	17.7677		36.3958	35.4574	1.90637	3.80452	2.18912	6.71681	5.07618	2.8366	1.41818	4.08882	1.65245	0.282558	0.15477		0.139663	2.02513	0.428825	0.0600044	0.0774744	0.0601589	0.130081	0.134863	0.023698	0.276877	1.3633	0.818139	0.15376	0.10314	0.501021	0.498996	0.362639	1.06528	0.297078	0.143272	0.264331	0.0913048	0.0599616	0.795236	0.34109	0.0871007	0.478843	0.932105	0.794465	16.5776	6.28724
ENSG00000091490.10	SEL1L3	15.5466	5.48746		67.3212	77.5906	3.85131	6.74253	6.42753	6.54264	6.80847	3.34069	3.26973	4.6918	4.19668	2.19443	1.77972		6.39014	9.39413	3.45856	3.82397	4.6009	1.97332	13.354	6.24172	5.09151	63.1334	2.33617	4.56385	3.74329	26.0764	3.43881	3.8108	3.51006	6.12112	1.73609	1.18158	4.74722	8.83725	2.24375	27.5051	49.0368	0.699441	6.4996	5.11945	16.5509	5.25772	8.11633
ENSG00000140323.5	DISP2	15.497	137.266		58.5108	63.3094	3.21669	4.97015	3.31837	7.76888	7.84422	2.95546	6.02293	4.16956	2.15577	1.37972	1.72338		0.130916	0.195492	0.142034	0.144393	0.157627	0.125011	0.253513	0.185518	0.284034	0.0359163	0.186805	0.270407	0.627177	1.34725	0.248361	0.12185	0.25082	0.203203	0.160171	0.0939323	0.0603872	0.0595825	0.0728597	0.206981	0.190215	0.0576015	0.500253	0.230271	0.1619	3.04154	0.17754
ENSG00000106069.21	CHN2	15.4943	35.2477		97.1127	143.471	4.58912	3.57536	3.87439	3.88782	6.28473	6.54095	5.35392	6.88588	3.82675	16.3381	5.40712		1.95627	2.46762	2.06845	3.35792	4.33444	1.43634	4.09558	2.14708	0.291075	0.0157081	2.06614	2.84962	3.06028	3.66861	2.17783	0.516457	1.91355	5.5555	0.693187	2.25917	1.89435	2.9169	5.32474	3.42626	1.43388	0.647988	1.73372	8.97649	5.98447	2.01654	3.14982
ENSG00000166763.7	STRCP1	15.4755	13.1005		2.55647	2.48963	0.0759646	0.164652	0.159819	0.38298	0.381531	0.0970753	0.169966	0.270451	0.120709	0.121747	0.0900352		0.155212	0.0851273	0.0519059	0.131589	0.0823453	0.0857868	0.113702	0.253429	0.00774831	0.12179	0.19842	0.32839	0.111973	0.163065	0.0885157	0.125129	0.0936512	0.39538	0.0246848	0.00828195	0.0939561	0.0957537	0.184757	0.102759	0.264631	0.0189425	0.243824	0.305114	0.0467524	0.432713	0.356924
ENSG00000073670.13	ADAM11	15.3984	93.7662		235.33	196.178	9.93343	30.1477	7.3214	64.5965	52.673	21.9653	9.92072	6.84603	5.63769	4.24541	4.13704		1.43581	0.988222	0.339308	1.90853	1.21613	1.0334	2.00956	1.61747	0.302421	0.299254	4.7983	4.31255	5.27946	1.85476	2.03373	0.864954	1.63293	4.81601	10.8449	4.37829	0.4513	0.347694	0.172286	0.790675	0.580163	0.252346	2.61261	4.15772	0.222709	4.20763	3.30203
ENSG00000266028.7	SRGAP2	14.865	12.0361		128.985	125.572	6.77512	7.62188	7.10773	9.64053	10.1935	8.57878	8.44847	7.647	5.56887	15.8194	9.01036		15.4324	14.468	11.6383	10.3979	10.0233	8.12271	9.18213	11.8544	13.6519	2.35107	13.4923	12.3097	8.49446	5.43624	8.26421	7.64363	8.06857	13.5083	4.03586	2.40234	6.8758	6.85948	1.82374	17.4747	6.19837	1.6588	31.5162	15.8435	1.68848	8.60528	7.74419
ENSG00000243708.10	PLA2G4B	14.7351	5.97182		275.252	241.977	14.7049	18.2823	16.1891	29.9787	21.7509	15.5197	27.2432	19.541	12.5557	26.8011	14.2125		29.4097	25.4359	15.1888	29.3095	27.1517	24.0998	47.6396	38.4472	6.20781	12.6225	97.8299	74.699	31.9825	21.9017	32.4202	79.6103	26.8326	77.9612	12.9432	8.66867	20.3938	35.7495	17.2385	48.2622	47.9784	7.13495	55.4636	87.8086	18.3022	65.4407	89.7968
ENSG00000169946.13	ZFPM2	14.649	5.24524		27.2681	39.2331	1.86854	2.24629	1.30575	3.01915	4.02076	2.18862	2.06792	1.3743	1.06568	1.11416	1.36223		7.93832	11.703	1.5821	8.89462	9.7554	9.59137	8.75391	5.21433	0.549822	0.0144643	9.62844	5.22329	5.14782	1.81294	7.33693	1.06171	6.53648	17.6002	4.84958	3.37405	0.550288	0.402817	0.644009	4.53895	0.848216	5.67057	4.26991	26.9572	0.189383	1.06119	0.650014
ENSG00000112293.14	GPLD1	14.6354	8.83206		18.818	17.1577	0.811743	1.4759	1.20838	2.68362	2.63432	0.720481	2.3278	1.50828	0.73559	0.696871	0.738509		2.02226	1.16175	0.411186	7.84641	2.31488	3.12641	2.5505	1.3401	0.0643075	1.06185	1.93802	1.73909	2.26508	0.821368	1.6096	0.492393	1.4672	2.13704	0.424568	0.243525	0.270461	0.258974	10.2861	0.911494	0.515931	0.615105	2.45452	2.39282	0.343793	3.91362	1.94624
ENSG00000120088.14	CRHR1	14.545	62.5522		59.184	59.2263	5.4165	8.23941	1.9579	13.894	12.5025	3.30878	2.78354	2.08706	1.63463	1.47323	1.28663		0.08795	0.214275	0.0118364	0.0342228	0.0467585	0.0263852	0.130813	0.42455	0	0.0232991	3.25885	2.02671	0.0615479	0.0255193	0.0937618	0.0727583	0.0723871	1.29709	0.0192414	0.0118368	0.06283	0.100783	0	0.0253277	0.112014	0.04455	0.395999	0.168645	0.0122597	20.234	1.32834
ENSG00000182575.7	NXPH3	14.4406	5.3401		66.4488	74.8307	3.01153	5.66834	4.75439	11.376	11.8745	4.68218	3.28941	1.1501	7.05827	2.2705	2.25615		7.29045	5.41229	0.55974	106.92	39.9461	68.4065	14.3104	5.56631	0.294716	0.948022	28.3074	27.3754	22.4922	7.11764	15.3867	1.80875	11.8379	16.7982	2.77758	1.75615	0.421299	0.311856	0.0994253	5.6408	2.52815	0.92457	11.2641	11.2678	0.237706	15.6866	10.8677
ENSG00000111664.10	GNB3	14.4381	7.70306		62.6144	49.2177	3.01128	5.04812	5.78911	9.70072	6.45935	3.20502	5.3235	7.04463	4.59574	1.42281	1.46781		3.22169	2.5068	2.20668	12.7724	11.782	7.71572	7.99693	3.7444	6.3847	1.36112	15.4528	15.0294	6.8214	3.52339	6.55742	1.7189	5.89145	10.5326	5.52069	4.35488	1.83432	3.24421	0.359633	3.96963	5.86587	0.458916	8.28144	19.455	1.53494	84.7614	13.3334
ENSG00000188730.4	VWC2	14.3874	50.3436		21.1984	24.029	2.11832	2.27002	0.759941	1.92661	3.02547	0.972433	2.2903	1.03785	0.520624	0.627182	1.1119		0.130679	0.0352694	0.0065771	0.0703538	0.0448267	0.0398408	0.0389026	0.0423224	0	0.0164482	0.286543	0.295646	0.0550421	0.0986726	0.0507038	0.0961447	0.0458892	0.440351	2.39702	2.61396	0.0321379	0.110906	0.00340565	0.115618	0.0427233	0.0158205	0.0381287	7.81759	0.00796405	0.0644313	0.0555668
ENSG00000116151.13	MORN1	14.0967	7.25353		17.5225	16.9919	0.940436	1.32599	1.56856	1.96299	1.95331	0.929028	1.26232	1.87213	1.04315	0.780774	0.754543		1.32001	1.19198	1.30571	1.30069	1.29663	1.24217	2.08708	2.12573	1.52195	1.18889	3.92986	4.71114	1.78777	1.40863	1.65827	1.44862	1.55089	5.50984	0.533789	0.302008	1.78303	1.87741	0.721353	1.84467	1.69571	0.532927	4.47991	6.73444	0.762123	5.56269	3.33022
ENSG00000107736.19	CDH23	14.0015	5.21119		21.5278	19.4057	1.54376	0.85108	1.28933	1.50919	0.986531	1.14868	2.67198	0.831086	1.09143	1.75835	3.2031		4.5185	8.62669	1.95305	1.52528	3.44597	1.66222	2.03561	4.58805	0.0522788	0.153583	3.88218	3.71421	1.27021	1.10824	7.67973	0.998329	13.3972	11.3083	1.23925	1.09229	0.321802	0.423251	2.76396	7.8954	0.908795	0.436606	3.99726	37.0562	3.19684	0.746255	2.46109
ENSG00000196132.11	MYT1	13.905	151.857		64.7425	68.1578	5.12611	4.41684	3.95909	3.90989	3.52021	4.12782	8.41127	5.20739	3.11424	3.58497	5.09261		0.0133534	0.0328408	1.79045	0.0090519	0.00980002	0.00743437	0.0227855	0.0330137	0	0.104512	0.0303412	0.0229494	0.244987	0.131035	0.037372	0.0214943	0.0351924	0.222417	0.102165	0.0328261	0.0512794	0.109634	0.0564933	0.039965	0.0115385	0.0133974	0.0153081	0.0800605	0.190178	10.5855	0.132697
ENSG00000099889.13	ARVCF	13.7921	8.91579		162.38	164.995	12.3718	14.5858	10.1508	17.4272	15.9194	9.70337	18.1351	11.6202	7.79071	9.60923	7.84724		11.5226	7.28563	8.24624	56.6668	35.0222	45.7703	11.4327	14.715	1.42731	0.796268	14.238	19.7326	18.9115	9.91125	17.091	3.80561	18.2401	13.7899	10.2855	8.90774	12.5871	20.5796	10.3198	17.4372	16.569	7.93263	59.1928	15.1787	6.13155	36.2916	22.2141
ENSG00000258102.3	MAP1LC3B2	13.6445	11.3631		10.0328	9.41544	0.658796	0.613796	0.881153	0.823179	0.877549	0.585625	0.695321	0.973264	0.644376	0.829596	0.593539		0.926033	1.17285	0.433922	0.563495	0.517358	0.656604	0.350963	1.098	0.640391	0.741448	0.394864	0.630211	0.584583	0.428726	0.565499	0.555418	0.553403	2.21307	0.374527	0.329	0.525881	0.438618	0.133836	0.652956	0.626842	0.668081	3.97229	4.00587	0.126085	0.451028	0.748947
ENSG00000169752.16	NRG4	13.5543	11.6323		13.756	15.6166	1.03371	1.20226	0.7503	1.67839	2.12423	0.653566	2.04023	0.903392	0.39036	0.553874	0.496859		0.377382	0.420952	1.5149	0.343975	0.349835	0.349862	0.774033	0.441687	0.421184	0.702327	0.579908	0.906056	0.383853	0.59044	0.354664	1.09958	0.350038	0.84722	0.109032	0.0664594	0.480237	0.813475	0.586921	1.00128	1.04712	1.4813	0.787976	0.578719	6.84668	2.70727	2.50923
ENSG00000179111.8	HES7	13.5324	11.0519		6.99881	5.82705	0.421131	0.806038	0.469027	1.52972	1.32306	0.368275	0.395617	0.511769	0.409613	0.261937	0.205442		0.453007	0.407427	0.145139	0.698752	0.773762	0.740995	0.335123	0.470565	0.565904	3.04622	0.959934	1.03982	0.346088	0.203953	0.48789	0.209276	0.449447	0.593181	0.498069	0.315324	0.196079	0.836831	0.0306691	0.940024	0.51653	0.128877	2.01393	1.22796	0.0530063	0.422635	0.604705
ENSG00000230453.9	ANKRD18B	13.5301	21.2553		5.52735	7.20825	0.778095	1.09052	0.0732772	0.96869	0.951576	0.385283	0.329159	0.0706656	0.0400007	0.231464	0.135176		0	0	0	0	0	0	0.205009	0.0157628	0.0494914	0.0113935	0.0289588	0.055888	0.0298531	0.016097	0	1.12613	0	0.0376411	0.0164893	0.00631079	0.0124442	0.0237794	0.0178456	0.0266399	0.0205566	0.0234736	0	0	0.0109793	0.358526	0.743795
ENSG00000053702.14	NRIP2	13.4751	11.2526		116.589	131.78	4.38418	5.12383	13.1962	6.93843	7.35061	6.50002	10.8105	7.4211	14.9085	9.11617	7.71091		8.62146	8.26308	5.29326	7.03845	17.9352	31.6041	8.09799	9.72818	1.84331	1.98913	16.4091	18.0657	8.90683	6.2746	7.86443	3.57725	7.21508	11.4186	3.54212	2.87298	11.1356	17.3612	1.2192	4.08471	5.30033	2.04063	84.126	15.6381	2.25484	6.42337	7.75781
ENSG00000168016.13	TRANK1	13.4667	5.83132		94.9042	83.5437	3.36968	5.24289	11.4453	15.668	11.9612	3.08998	6.82369	17.085	6.88137	2.5159	2.0583		9.42808	10.2845	6.17638	29.1043	23.6786	12.6244	28.8719	10.3688	9.45508	13.5926	45.4918	42.4385	19.1788	14.3851	14.4785	3.9204	12.0626	105.827	4.82249	1.53345	2.47445	3.4738	4.30721	15.4748	5.64201	0.621341	9.48608	30.2415	1.38539	12.8909	27.3599
ENSG00000130684.13	ZNF337	13.3747	5.16526		65.4196	57.8052	3.5562	4.35408	5.86523	9.10748	6.25514	4.07352	4.83585	6.67346	4.1312	5.35982	3.8084		11.7819	10.2447	7.2258	11.4278	11.8657	9.63399	17.1287	12.9607	13.4363	16.3086	18.2484	25.7829	18.0487	10.5899	18.4619	7.97531	18.4864	19.1648	4.42581	2.73723	5.13229	9.23051	2.8917	13.2652	9.50659	3.06135	21.5979	28.1968	4.1971	19.5965	20.3166
ENSG00000171316.11	CHD7	13.1376	10.1005		48.2542	51.6602	3.78868	2.37395	3.64147	2.57859	2.34212	3.70876	3.48253	2.67342	3.24142	7.32425	4.15323		4.72791	4.60793	2.18361	1.22395	2.34184	1.5553	3.59423	5.30403	1.39757	13.7867	3.0387	3.99781	5.72183	5.74235	3.20539	5.94333	4.1174	3.42738	2.91578	2.15345	2.25555	4.16132	1.75764	7.50947	4.9044	5.81184	10.3894	1.90807	2.60959	9.84169	4.32949
ENSG00000145087.12	STXBP5L	13.1065	63.9224		44.835	48.0056	1.86295	4.55356	2.87735	9.6628	11.9237	3.34722	2.44468	2.81114	1.88412	1.29628	1.20714		0.00958462	0.00710691	0.619701	0.0104369	0.0102868	0.0148674	0.779165	0.014171	0.0203166	0.0404902	0.385125	1.13057	1.63928	0.258263	0.157334	0.0569668	0.142229	0.198222	0.0130654	0.00359735	0.00617797	0.012837	0.00335379	0.0109083	0.0167698	0.00585971	0.0719401	8.77959	0.0906079	5.24263	1.65976
ENSG00000129993.14	CBFA2T3	13.104	8.47294		63.0487	56.9368	3.59469	6.41227	6.00784	8.84997	8.31776	3.17986	4.3838	7.51337	4.50622	1.8851	2.31333		8.9109	10.4258	2.04074	1.84382	4.20045	1.51746	5.14416	11.179	0.0357858	27.7625	5.42012	7.6645	4.86497	6.04651	6.38662	3.31486	6.20404	6.92655	4.65583	6.90995	0.949254	1.1063	3.14628	19.7166	6.4767	4.52669	6.20804	1.23093	13.1428	6.56547	11.4667
ENSG00000177679.15	SRRM3	13.0634	55.5114		201.129	209.892	7.79539	16.0039	24.4321	26.7831	24.7536	7.96209	17.4606	27.8024	19.0667	2.79284	5.89363		1.58808	2.76639	13.041	2.85472	1.63245	1.15326	1.53437	2.11331	2.63682	0.126674	9.2366	7.23682	1.9502	1.29347	1.47401	7.19472	1.53847	5.05405	5.21914	1.56857	0.482314	1.83479	0.0836898	0.697974	3.03716	0.246596	1.19254	6.05878	0.736296	23.7562	3.93523
ENSG00000157978.11	LDLRAP1	12.8949	7.27367		129.388	115.421	4.71353	2.23905	5.14986	4.78345	3.29498	8.44922	5.05828	3.11587	6.20438	49.2008	12.9148		13.3711	12.5476	18.3497	34.6424	20.7996	15.8865	12.6286	15.2161	12.7373	10.3785	19.1825	18.2464	12.8933	17.5462	14.1926	18.6562	12.9759	15.7463	5.36597	5.02355	9.13928	11.0123	12.2347	22.3555	26.3213	6.17547	16.8194	14.7762	17.2869	25.4721	29.8488
ENSG00000146021.14	KLHL3	12.8282	12.0425		65.9471	66.8027	3.42688	4.16247	5.75509	6.90144	6.75631	5.19306	4.49952	7.13612	4.79485	5.24552	4.43827		6.0672	3.60562	7.66672	6.09649	6.38854	3.56407	5.02626	5.31635	1.13066	6.52453	8.6207	8.59892	3.37391	2.40396	4.18507	2.64826	3.64685	6.70246	10.8742	5.95265	4.89266	2.79885	1.14359	4.18006	2.31106	0.97431	15.2903	8.49882	1.15231	12.5745	4.35493
ENSG00000102057.9	KCND1	12.8026	6.48472		18.462	15.5462	1.13842	1.52869	1.61738	2.86	2.1751	1.22946	1.59793	1.39712	1.39733	1.15231	1.18674		2.74019	4.67875	0.873988	5.30921	4.29979	2.29561	3.45066	2.59127	1.29441	2.6473	5.17201	5.04046	2.89856	2.08207	2.31103	1.16546	1.68482	9.88345	1.51248	0.380916	1.15122	1.77509	0.651951	3.87155	1.09706	0.255489	4.61001	4.10396	0.539944	3.43727	3.43978
ENSG00000144550.12	CPNE9	12.712	137.459		74.3883	70.3134	1.60313	10.5317	2.15077	34.5392	29.5001	0.99046	6.90922	1.32511	2.3129	1.69922	1.49577		0.164142	0.223246	2.57477	0.140847	0.156873	0.100206	0.138525	0.145152	0.0304092	0.0422806	0.152944	0.12511	0.71877	0.347727	0.228663	0.103572	0.252874	0.221762	0.0765989	0.0273499	0.11469	0.298963	0.0348278	0.326061	0.12507	0.0352163	0.239213	0.175173	0.0762801	8.43058	0.195937
ENSG00000182870.12	GALNT9	12.7079	105.646		104.398	102.231	7.4383	18.5326	1.16725	31.1851	29.5366	11.6156	7.16142	1.10243	0.9782	1.43083	3.18875		0.0519805	4.6121	0.501186	0.501635	0.141356	0.0808693	0.337473	0.0987488	0.0731147	0.0555824	1.70676	1.32785	0.956332	0.524773	0.228755	0.0396561	0.194389	1.38596	0.0617459	0.0210302	2.41708	4.58686	0.0511754	0.153118	0.047295	0.0201697	0.130189	0.759121	0.0294273	5.68782	0.651007
ENSG00000143434.15	SEMA6C	12.6399	5.47306		81.936	70.2606	5.4308	8.20685	5.44485	13.3994	10.7489	5.60222	9.88925	7.29505	4.46728	3.48549	4.25242		11.8809	11.7978	2.86343	8.85114	9.15702	6.84395	12.7619	12.8343	3.36864	0.545491	24.5164	24.6134	10.8537	6.206	14.1199	4.68177	12.8249	20.9003	18.0524	17.7323	9.55487	6.15095	5.10002	8.68709	8.5337	82.4742	36.4521	26.9228	1.98603	20.8012	12.5091
ENSG00000182566.13	CLEC4G	12.6294	15.4061		20.9245	21.3065	1.03235	2.4631	1.61238	3.14835	3.25196	2.74303	1.36511	1.83737	1.05434	0.551038	0.657464		4.14788	4.13329	0.434824	1.19741	2.12212	0.240613	2.24634	1.9369	0	0.279281	0.198785	0.189748	0.644	0.913338	1.04668	0.236617	1.28329	0.732328	0.330285	0.342546	0.144144	0.388184	21.8574	0.962937	0.68229	0.136941	0.80465	0.440361	0.056024	0.174628	0.253649
ENSG00000110931.18	CAMKK2	12.6278	18.0643		446.902	479.895	30.026	54.6101	45.3719	99.7567	108.304	17.1153	8.95478	32.3938	34.0572	13.9287	9.14174		32.3293	26.0543	15.4235	31.7462	30.2312	30.0994	32.4377	28.5216	28.7704	25.5105	34.4935	31.7653	25.5037	21.4804	26.8335	16.4722	25.7707	40.5466	9.93478	6.08069	10.3444	13.1225	14.1386	32.3689	20.1555	4.80192	30.4891	37.3988	7.47806	14.0209	34.3718
ENSG00000167281.18	RBFOX3	12.5151	52.926		229.901	234.167	14.955	29.2404	20.8714	55.5868	54.1944	15.0953	6.74395	21.1021	17.7697	2.18812	1.53858		0.349524	0.24455	0.108122	0.355228	0.33164	0.530558	33.7451	0.211	0.0703742	0.0864544	0.681467	1.37312	58.4926	13.436	11.6646	1.94921	10.2906	2.11528	0.0964847	0.0640842	0.080133	0.107559	0.0567613	0.374296	0.118612	0.17601	0.379594	0.534526	0.0996709	4.60995	11.6872
ENSG00000117602.11	RCAN3	12.4409	6.60297		38.6436	56.5391	1.25874	1.1682	2.09494	1.05164	1.30717	1.65642	7.53317	2.02151	2.14115	7.61743	4.26313		3.913	3.23991	0.825483	1.48749	2.5729	1.20721	3.05149	6.04354	5.35623	0.478447	3.33335	3.34665	5.76278	5.40061	4.75996	14.2621	4.75817	3.75385	1.63283	1.37513	2.97479	5.46164	0.806273	7.23913	11.7141	0.478131	10.0068	0.927606	5.01672	12.6471	24.0325
ENSG00000138604.9	GLCE	12.3984	8.58099		65.4612	71.9214	3.22894	3.76935	4.52676	5.35159	7.15454	3.29226	5.76877	8.39749	3.43741	9.33525	3.88714		9.27532	8.40543	11.785	6.84582	6.73567	4.68311	6.68336	9.238	16.1299	1.4406	9.10105	9.72431	6.47872	9.1803	5.84257	12.1056	5.51141	9.48518	3.50357	3.04525	5.38302	7.61712	7.40417	11.2943	15.5288	2.21572	9.50684	12.2849	2.90246	10.6339	6.48556
ENSG00000137802.13	MAPKBP1	12.3559	7.37856		124.029	107.557	7.22198	10.5044	10.3816	19.3359	14.6293	8.40457	10.9114	13.6065	8.43361	9.07027	7.21659		11.082	9.02877	13.4086	15.8423	13.1938	15.786	18.96	12.7866	12.622	12.0533	20.8351	20.1117	17.1717	9.01631	20.2981	24.2459	20.3552	21.1882	4.90631	3.66427	5.77689	7.8486	2.6199	11.9567	10.6876	3.57176	24.7459	29.3338	3.48842	22.9134	16.4288
ENSG00000162461.7	SLC25A34	12.2101	5.64084		30.0952	27.5622	2.29256	2.99321	2.75061	4.6077	3.55898	1.72118	2.59178	3.47034	2.1453	1.55068	1.57325		4.12134	3.63098	5.57905	9.87171	7.29774	5.84273	4.46935	3.22516	0.938062	0.712425	8.726	7.02907	4.61723	7.16268	3.46825	1.91031	2.89236	5.96608	2.48659	6.91225	4.24652	4.68936	2.88088	4.94269	2.45981	21.1752	7.08625	8.51261	2.83148	7.63891	4.70125
ENSG00000099954.18	CECR2	12.1864	16.1292		35.9593	31.4105	2.7633	1.82952	3.72329	2.31414	1.70451	3.00286	2.61096	3.12169	3.0176	4.20454	3.52954		0.464073	0.927512	0.294149	0.117863	0.515253	0.0995625	0.953287	1.27959	0.00823215	0.0610865	1.62985	3.16846	2.01498	0.81087	1.8874	0.353143	1.88798	4.01658	2.40586	2.09362	1.21276	1.21652	4.91656	5.3322	0.375948	9.53269	3.39721	4.69533	1.72352	12.6579	1.76034
ENSG00000198089.15	SFI1	12.1777	6.02983		73.4331	72.1906	3.78727	5.04655	6.9408	8.67433	7.71718	3.93411	7.76721	8.43262	5.76804	6.55179	4.35572		9.12439	6.88271	10.3191	11.5059	9.77629	9.89874	12.8139	11.0486	6.21605	31.3235	13.5558	18.4411	12.0181	10.8958	9.00764	7.08381	8.6645	14.7304	3.03822	1.58642	7.01645	8.58149	2.87787	14.3471	10.0403	1.18551	15.4816	15.2775	4.16315	26.1613	15.6302
ENSG00000183570.16	PCBP3	12.1769	13.5814		41.0499	37.7761	2.63161	3.45143	2.69248	4.12933	3.99034	2.6602	4.25213	3.67208	2.74889	4.79179	2.82021		3.68202	3.60463	0.893751	2.5424	1.7502	0.484062	1.47978	2.2255	6.82809	0.72362	3.94412	5.3129	6.90212	3.56876	5.20035	0.564307	5.73062	3.4938	0.834763	0.31905	0.510631	1.79969	0.253662	1.62103	0.917445	0.0792621	3.74649	2.85925	0.567346	13.9201	1.07139
ENSG00000159761.14	C16orf86	12.1709	6.1288		67.2483	57.3983	4.31507	4.74604	6.55532	6.59155	5.54407	4.04279	5.60567	8.14338	5.76555	5.84739	4.68823		11.1659	7.58985	8.27133	9.13306	10.0931	8.02939	10.5893	10.4482	6.20492	6.54675	12.236	13.7792	12.8341	6.22479	9.8138	3.43587	9.93503	13.6433	4.37704	2.88121	7.49399	10.5523	4.14917	8.69863	5.8919	4.58962	19.7438	9.5184	2.88759	11.5914	9.70877
ENSG00000006071.12	ABCC8	12.1067	34.9903		125.935	106.125	6.93692	14.5522	9.76299	30.0186	22.182	8.25376	10.1244	10.187	6.88981	9.74942	5.38241		0.344894	0.524966	0.374595	0.120094	0.212239	0.189693	0.398914	1.65406	0.0113234	0.0179703	8.81591	4.31605	1.45088	1.12481	0.534672	0.12661	0.537444	1.70193	1.51789	0.967023	0.455654	0.739279	0.0836391	5.5863	0.0720083	1.15933	5.19364	0.686187	10.09	74.0619	3.42677
ENSG00000168350.7	DEGS2	12.0811	6.71653		33.8734	33.6694	1.78993	1.85257	4.247	3.2639	2.76397	1.9218	1.92829	4.98592	3.79728	2.56245	2.18911		0.456057	0.410021	0.160091	0.152402	0.273116	0.188696	0.923364	3.25545	0.0935284	0.386252	1.13881	2.32111	0.369989	6.85908	0.325125	27.2886	0.313915	3.22631	0.118642	0.0473631	1.60065	7.3761	0.284183	0.986461	7.96999	0.085436	2.22462	1.50345	1.73401	3.71167	1.78929
ENSG00000008300.16	CELSR3	12.0186	30.0979		59.0651	46.7394	3.46843	5.93994	4.5528	12.3944	9.36142	3.77849	6.54395	6.00344	3.62853	3.51597	2.35168		0.762852	0.631603	0.656735	1.42119	1.07465	1.13131	0.783933	0.924469	1.31955	1.48245	0.940881	1.05783	0.857116	0.982426	0.622896	0.455704	0.625666	0.998892	0.23733	0.125116	0.339574	0.343084	0.24876	1.08862	0.565161	0.152147	1.60335	1.19189	0.584331	34.2958	1.00194
ENSG00000130584.10	ZBTB46	12.0032	5.60257		43.4999	40.2323	3.22868	4.95421	3.61902	6.66006	5.64333	2.76695	4.00357	4.22996	2.91431	2.53953	2.34073		10.6304	11.6543	5.50519	4.82154	5.92384	2.98681	5.45828	11.0895	1.15576	1.93586	9.58398	15.0791	3.74295	3.0032	6.44671	2.58586	5.83895	13.9113	4.97017	5.0771	7.17835	11.2709	3.02216	10.0115	4.06892	2.50151	14.0266	21.7063	1.87025	16.8733	7.77193
ENSG00000152495.10	CAMK4	11.8196	82.6684		90.9387	111.937	4.96656	5.29738	15.0724	9.3728	11.091	4.24923	3.13089	19.921	10.8098	1.05462	1.34615		0.257541	0.356389	0.147456	0.213978	0.266683	0.207362	0.714275	0.221228	0.537332	12.4036	0.91332	0.895229	0.798523	0.971736	0.426716	0.430808	0.416137	0.518445	0.0806112	0.035217	0.182547	0.413058	0.383419	1.32332	0.201659	0.0235755	0.324441	0.531836	0.0661062	0.998054	1.60814
ENSG00000116819.6	TFAP2E	11.7898	24.1732		76.8678	71.1239	5.01834	5.61069	7.25513	9.25875	7.36933	5.10466	7.2166	8.84426	6.28922	8.14636	4.34388		2.02791	1.86814	0.775407	1.93563	2.03937	1.43246	1.78259	2.28219	1.10021	1.60417	10.0276	6.90662	2.15571	1.41582	2.58719	1.87188	2.27622	6.73358	0.762984	0.495751	0.692822	1.88277	0.264969	3.27583	1.58273	0.405404	7.11129	5.31386	0.453722	7.06382	3.80133
ENSG00000241878.11	PISD	11.6231	6.91511		192.02	193.552	11.9461	17.3716	17.794	29.3064	27.5789	12.4454	18.6899	22.039	12.8928	13.6941	10.7537		33.7481	41.4534	28.5808	23.1657	24.875	16.7867	25.924	37.3273	28.5212	39.288	33.3369	32.2305	24.1967	19.9986	17.1389	22.4577	16.5865	37.5314	9.75779	6.32232	22.5991	41.3617	10.7949	37.8329	21.0397	7.17306	31.0568	30.1926	9.77027	42.9446	31.8421
ENSG00000242419.5	PCDHGC4	11.6116	44.1763		25.5648	33.2528	1.93121	3.43934	1.99176	2.93019	4.10233	1.40835	4.01393	2.16837	1.04962	0.888105	1.02358		0.352231	0.282584	0.328094	0.910621	0.644868	0.489131	0.407017	0.362984	0.785701	0.105066	0.714616	0.897193	1.08889	0.341971	0.753249	0.29382	0.807833	0.657424	0.822393	1.48892	0.0942335	0.109402	0.0541654	0.697881	0.422485	0.342982	0.566399	0.758363	0.159376	1.94503	0.508232
ENSG00000135835.11	KIAA1614	11.6101	5.05026		16.0414	14.7265	1.30209	1.93384	1.42925	3.08143	2.62784	1.31273	0.999087	1.25137	1.08659	0.954767	0.91922		3.84948	2.19439	0.527624	4.92481	4.42254	4.94427	4.6301	2.78164	3.09529	1.36012	6.00895	6.70587	5.84561	2.28044	5.9895	1.1891	6.1106	5.576	2.65608	1.38892	1.88929	3.12481	0.143935	2.85742	1.13329	0.526639	7.05038	5.39885	0.330174	1.28195	3.58308
ENSG00000204969.6	PCDHA2	11.4074	10.1352		3.11703	2.52485	0.231009	0.317504	0.246188	0.381241	0.396177	0.228581	0.34665	0.293903	0.129915	0.356439	0.186092		0.0957189	0.17659	0.0568391	0.119623	0.172581	0.112797	0.124377	0.295769	0.028933	0.0350456	0.705772	0.977234	0.276245	0.154755	0.130198	0.0327115	0.124985	0.410885	0.0626339	0.0204605	0.170506	0.237838	0	0.356428	0.102693	0	0.491188	0.803045	0.208854	2.12905	0.172535
ENSG00000023171.16	GRAMD1B	11.4043	29.467		113.667	109.02	7.8006	13.2739	9.51359	22.7224	22.0459	9.11708	8.26523	12.6536	7.65311	3.72848	5.61923		0.704703	0.672481	56.6192	0.435593	0.69194	0.325172	0.392247	0.653391	1.33818	2.31046	0.294504	0.646097	0.882832	0.883094	0.497856	0.27103	0.48133	1.15286	0.539289	2.80662	2.53819	2.06282	0.325753	1.53612	0.771864	0.671849	20.6581	10.4011	0.408041	13.1634	0.747545
ENSG00000183785.14	TUBA8	11.3898	27.8138		10.6897	11.8156	0.4865	1.26232	1.29308	1.67264	1.96238	0.810126	0.596853	1.58336	1.00494	0.198019	0.187764		0.350772	0.321585	0.128326	0.132966	0.322489	0.267118	0.274368	0.316994	0.0818802	0.407093	0.367923	0.265841	0.144087	0.147977	0.292962	0.117436	0.441968	0.54033	0.879299	0.774311	0.120232	0.161059	0.149921	0.195699	0.291279	0.857096	0.419045	0.314954	0.094763	1.41043	0.424981
ENSG00000070501.11	POLB	11.3719	9.81811		127.795	157.739	10.1943	11.7233	9.91078	12.7783	15.0606	8.87261	13.2039	11.8834	8.23618	13.9833	9.30931		10.6851	9.55351	10.0049	10.0845	10.4978	9.32121	9.08329	13.401	10.426	23.3847	15.2408	12.8767	7.3563	6.61976	7.59936	15.6165	7.37249	13.095	6.60055	8.00067	5.94639	11.0312	7.46061	13.2161	10.4427	18.288	13.5183	17.4563	5.25053	23.7471	19.775
ENSG00000099204.18	ABLIM1	11.3015	5.72289		390.033	480.238	29.9379	41.2243	35.2809	43.3029	44.1139	25.3714	30.7947	44.5069	32.0428	32.5989	29.2443		102.333	71.5767	108.067	29.0773	39.793	21.9534	58.653	84.24	1.91496	20.4485	45.7418	47.7786	35.7539	36.7411	67.1335	197.394	65.4521	66.604	127.682	171.283	29.1181	55.4179	13.9858	61.0356	82.6538	42.8285	90.8966	241.836	13.0498	36.2559	27.5603
ENSG00000118160.13	SLC8A2	11.2576	123.382		208.575	222.779	16.0028	32.2484	12.9022	49.2061	53.6357	21.5059	14.7396	18.0756	9.40888	4.20232	2.55328		0.10685	0.14869	0.124348	0.44817	0.342096	0.805033	2.10195	0.13741	0.074289	0.0477498	1.0513	1.22469	11.2027	2.76662	4.36217	0.459514	3.75363	3.05754	0.0654234	0.071375	0.045195	0.0281228	0.0512244	0.136237	0.109122	0.0667301	0.125956	0.136446	2.47498	14.7832	1.33499
ENSG00000159733.13	ZFYVE28	11.0808	14.0363		59.8195	53.6248	3.57708	6.03632	6.2382	10.7968	10.0353	4.09965	4.23097	7.94467	5.02893	3.78592	3.00771		4.89811	3.88788	5.60495	4.03017	4.42176	2.935	3.87923	4.95146	2.45852	0.704673	6.48304	6.18161	3.03999	4.89463	2.77275	3.01349	2.84428	5.38179	1.30951	1.03472	3.31218	6.43531	1.85663	5.96177	3.16807	1.00138	8.22326	4.44732	1.58286	9.07099	3.61824
ENSG00000095539.15	SEMA4G	10.955	5.62084		49.3933	36.7122	3.90953	5.0427	4.22641	6.70852	5.07127	3.30653	7.08981	5.61262	3.52392	3.52529	3.77919		1.78117	2.12401	9.55868	3.53225	2.26795	1.35595	3.06744	3.26454	3.6482	1.71645	6.70677	10.0411	3.38153	39.268	3.30599	2.84248	2.53627	7.83568	1.42826	0.645463	10.3984	6.43334	34.7726	4.59006	5.87882	0.544634	11.4624	24.7797	11.3523	11.8436	16.2505
ENSG00000006283.17	CACNA1G	10.9432	17.9708		32.5968	9.98368	2.03969	4.29051	1.20176	11.5288	8.87749	1.0899	6.77536	1.05765	1.06223	1.069	2.32381		0.242125	1.95734	0.142706	0.28286	0.208088	0.155476	0.155204	1.0922	0.440158	0.0647955	19.3835	16.9875	0.582396	0.237597	0.199862	0.353846	0.135758	5.64756	2.08021	0.0651955	0.0221441	0.0377933	0.011905	0.444262	0.209565	0.0395366	0.130829	7.40831	0.0451424	0.290012	1.59782
ENSG00000084628.9	NKAIN1	10.9369	80.1805		62.1808	61.2578	4.41257	3.9673	4.89389	8.43986	7.60271	6.46929	7.93806	4.80626	5.57838	5.07418	6.11159		0.138512	0.104297	8.94947	0.0397052	0.0670242	0.0312048	0.0529886	0.169915	0.122057	0.0401369	0.156511	0.0988203	0.501465	0.197234	0.181402	0.607946	0.177323	0.188458	0.0496763	0.032	0.1523	0.161953	0	0.0331277	0.410321	7.39316	0.169623	0.131285	0.132702	3.73777	0.719844
ENSG00000079102.16	RUNX1T1	10.8953	6.11492		28.499	37.224	1.77294	3.24163	3.15137	3.24572	4.59466	1.93923	2.45616	3.81697	2.2701	1.2768	1.63731		9.60573	4.88868	1.27049	4.348	5.51461	6.49382	5.58109	6.77958	8.88481	0.0114906	12.0499	11.8963	9.36707	3.92779	7.68598	1.10688	6.61673	7.43084	2.53812	2.42025	0.761322	1.60287	0.257129	4.79031	1.83923	1.15682	14.1692	4.134	0.41831	4.39464	3.07803
ENSG00000131398.13	KCNC3	10.8931	17.3853		78.1913	61.8388	4.44622	8.10125	6.52962	20.6092	22.1259	6.36318	5.03503	7.3398	4.99431	3.98689	2.85811		0.782292	0.667225	0.921822	1.13862	1.00393	0.457913	0.896472	2.73974	0.163448	3.23887	0.545775	0.81663	0.529011	0.728836	0.514666	1.32983	0.617802	12.0293	1.25732	0.724791	9.2948	15.2248	1.73081	5.37736	2.8271	0.558086	1.69697	0.313425	2.12781	24.0243	4.80473
ENSG00000183281.14	PLGLB1	10.8584	12.8602		6.66179	7.79492	0.447664	0.615139	0.637438	0.905875	0.833547	0.541315	0.75552	0.835602	0.50082	0.566782	0.401324		0.379018	0.315715	0.205978	0.280689	0.310896	0.334031	0.492568	0.407011	0.194661	0.132837	0.65256	0.620135	0.509576	0.332817	0.434838	0.352425	0.392609	0.30765	0.152451	0.154387	0.280374	0.477868	3.95086	0.300569	0.337456	0.208927	0.775135	0.706159	0.161101	1.15232	0.71737
ENSG00000070182.19	SPTB	10.849	9.59752		42.3972	49.633	2.57836	3.69979	4.76186	4.73981	5.87438	2.42494	4.22796	8.56848	3.20668	1.565	2.17184		0.692819	1.10888	0.200086	2.82127	7.01482	3.60197	0.587921	0.81487	0.0492687	0.0987654	1.00731	0.819655	0.600976	0.422014	0.728632	0.359141	0.670043	1.30182	16.6904	13.2851	1.50599	1.23035	0.139072	2.06635	0.655462	94.1714	5.27012	0.500527	0.65851	10.1043	0.657702
ENSG00000127578.6	WFIKKN1	10.8186	10.8921		20.4957	19.4919	1.61903	2.14866	2.47187	3.41551	2.73162	1.57205	1.16831	2.47387	2.34464	1.41415	1.00068		0.454795	0.709604	0.375904	1.01115	0.91185	0.661816	1.20519	0.792872	0.136358	0.282734	2.39016	3.4767	0.918582	1.15543	0.62054	0.809158	0.596201	2.1808	0.341807	0.290512	2.09476	6.91849	1.05059	2.17483	1.54609	0.829108	2.23948	3.56374	1.3535	6.67347	3.95549
ENSG00000196890.4	HIST3H2BB	10.7506	13.4182		8.11247	9.93583	0.368852	0.629604	0.715482	0.874493	0.912805	0.523719	1.16611	1.02335	0.391966	1.47231	0.341899		0.0802209	0.379561	0.804165	0.260398	0.401977	0.153623	0.545987	0.231864	0.180047	0.626844	1.16591	1.03295	0.237843	0.191571	0.330835	1.05922	0.248349	0.391219	0.534111	0.13287	0.220314	0.327998	0.0504803	0.985965	0.280618	0.0605259	0.823535	0.567508	0.0683003	1.60413	1.14709
ENSG00000188827.10	SLX4	10.7494	6.19352		28.6216	24.8832	2.25465	3.24567	1.94802	6.1124	4.48025	2.58074	3.45911	2.10788	1.66998	2.80103	2.07896		3.74333	2.69044	3.37909	4.40417	3.61669	3.51846	4.70978	3.52399	6.33271	12.8333	5.06319	5.27165	4.42221	3.28979	3.50421	3.87411	3.52764	5.02168	1.44603	1.27565	1.92698	1.90908	1.45458	4.91708	2.88444	1.64974	5.75457	4.01474	1.24921	8.05352	4.93233
ENSG00000165548.10	TMEM63C	10.7037	23.0582		88.6258	79.4936	4.74509	7.76544	7.45005	17.1934	14.9026	4.18472	16.6608	10.8799	5.9063	3.14091	7.16328		0.0867102	0.106549	3.65636	0.0814086	0.0910437	0.0496731	0.0864049	1.84403	0.0173831	0.203281	0.116406	0.136201	1.36332	3.97555	0.253195	6.65315	0.329569	0.18335	0.0478937	0.266915	0.408236	0.175156	0.0745349	0.484652	1.53244	0.0855548	0.0850512	0.178606	1.4881	78.8147	0.335548
ENSG00000080947.14	CROCCP3	10.6881	6.68578		38.8804	36.221	2.52496	3.50008	4.21703	5.5384	4.4377	3.1226	4.2722	4.87736	3.02456	3.88128	2.51958		3.7694	3.01208	4.03074	8.11255	5.93631	6.64847	7.54372	4.04569	3.01971	1.20353	12.5878	11.7676	7.51333	3.30778	6.34446	2.24542	5.66337	12.1733	1.85321	1.06247	2.56318	3.24312	0.698126	4.74501	3.87674	0.755076	12.091	16.8188	1.74277	15.3006	8.75542
ENSG00000143630.9	HCN3	10.573	8.28886		54.2808	46.4232	2.79029	6.03746	4.27866	9.29177	7.69071	2.51163	11.7936	5.56436	2.94426	3.61393	4.1142		3.82325	3.00887	5.53296	3.69747	3.46587	3.56759	6.81649	4.4871	2.41789	3.63058	12.4968	12.8906	6.05311	9.77548	4.25286	8.19691	4.92605	4.78681	1.23062	0.885988	8.11315	6.84956	9.59373	3.74176	7.93245	0.659457	6.75541	9.04723	2.10464	19.9618	7.72472
ENSG00000178233.17	TMEM151B	10.5492	741.103		242.126	225.579	18.7002	50.1468	8.02554	78.8301	75.0551	28.5478	19.5926	9.30319	5.00463	4.37583	10.7697		0.0693411	0.0682578	0.107977	0.0555566	0.0708544	0.0464301	0.0691344	0.111606	0.0747461	0.174902	0.121638	0.196479	1.14227	0.812013	0.325176	0.0919347	0.379477	0.10479	0.112227	0.115477	0.0480799	0.143796	0.0435256	0.0966267	0.157176	0.0309427	0.153431	0.197229	0.10799	5.17598	0.194693
ENSG00000160117.14	ANKLE1	10.495	6.6409		10.1968	9.90159	0.656729	0.908141	0.871483	1.56265	1.31434	0.77238	1.2056	0.995734	0.747693	1.42668	0.817121		1.15153	0.829426	0.691161	1.09802	1.03449	1.03856	1.09589	1.04022	1.38819	13.1823	1.6646	1.81436	1.33926	0.872993	1.29662	0.565626	1.30587	1.58436	0.346621	0.229239	0.353359	0.491172	0.431316	1.64568	0.759179	0.368779	2.21655	2.72999	0.209803	1.4809	1.7377
ENSG00000117682.16	DHDDS	10.4728	5.46586		95.0778	91.4356	6.50346	10.0821	8.91179	14.7991	14.0885	7.08116	10.2619	10.2755	7.80998	7.54005	8.23111		33.3015	22.8759	15.846	21.4143	19.8654	20.0855	19.0014	22.0779	26.9709	19.9626	19.2154	19.846	15.8296	21.0391	16.6266	22.0391	16.5862	17.8705	7.79814	6.5922	11.032	12.3542	7.38156	17.0461	18.3067	5.65973	16.993	15.5873	7.10434	24.3803	16.6245
ENSG00000166762.16	CATSPER2	10.4253	7.3996		20.7953	19.9944	1.48584	1.90246	1.76712	2.84996	2.52574	1.58586	2.46317	2.38023	1.54253	2.58233	1.71159		1.41328	1.43508	1.8357	2.18233	1.80095	1.75257	2.06039	1.98778	0.518428	1.76985	3.0593	3.64827	1.7322	2.08805	1.66967	1.73028	1.44002	3.55067	0.822566	0.401748	1.27879	2.90811	0.779536	1.84156	2.27911	0.788229	4.07575	3.6219	0.811366	8.81456	3.79197
ENSG00000157890.17	MEGF11	10.3548	97.1385		37.1028	36.7273	5.1213	3.51942	2.44181	2.40232	2.53903	5.10797	5.22085	2.5741	1.7891	3.06277	4.45507		0.0830308	0.0849347	0.0817582	0.0837046	0.0865615	0.066393	0.0911738	0.111603	0.0310971	0.254699	0.212592	0.174687	0.0903632	0.0939351	0.124581	0.115837	0.11754	0.616684	0.0564579	0.0271323	1.90231	0.610533	0.0192385	0.254318	0.108259	0.0402599	1.18943	0.242158	0.060352	1.84641	0.160585
ENSG00000149527.17	PLCH2	10.3463	14.9887		163.114	143.644	9.12148	21.4769	9.35158	33.8621	23.4704	17.7467	12.2724	11.509	7.57014	34.8191	10.3161		0.655189	1.1747	2.14629	0.673427	0.6511	0.22374	8.16667	9.28297	0.133164	1.99168	1.25998	1.10155	1.23159	2.02766	0.384487	36.0867	0.427879	2.162	0.211554	0.092601	5.19258	3.86559	4.54632	3.85704	24.6233	0.100607	0.692432	0.359957	4.17235	25.9498	37.1728
ENSG00000139625.12	MAP3K12	10.3258	6.55169		170.696	145.167	12.379	19.7357	16.48	40.6419	28.9634	13.269	17.9936	19.3373	12.3615	13.704	11.087		29.2826	23.3208	14.7343	33.4639	34.2806	27.2491	33.5185	25.2141	38.4803	6.85586	68.6185	68.1203	29.1057	15.772	31.2868	8.11374	27.289	47.6411	9.53392	4.43073	11.0546	12.6611	1.82116	31.5519	9.86944	2.52304	51.4319	57.9415	4.06266	59.3848	24.0376
ENSG00000110171.19	TRIM3	10.3192	7.22216		112.234	108.849	7.24005	12.118	8.00517	22.1998	20.5613	9.37705	11.7576	10.3329	7.13575	13.4721	8.7619		17.1458	13.5165	6.75074	27.5606	22.5989	26.9515	19.9819	16.9914	12.9273	3.33762	26.8368	26.1705	22.4082	18.9693	19.4519	7.06358	18.5627	23.9721	6.80954	4.66532	6.46636	7.06384	5.07871	20.5309	13.9923	7.45108	31.178	18.1957	4.66212	12.3206	20.9083
ENSG00000223345.3	HIST2H2BA	10.2785	7.18522		7.81877	7.92287	0.709003	0.603528	0.723862	0.775179	0.781808	0.591303	0.950428	0.700329	0.601679	1.09907	0.84592		0.385865	0.470769	1.83256	0.952182	0.906746	0.928497	1.32177	0.470921	1.25721	0	1.71304	1.17034	1.21394	0.466445	1.2605	0.438428	1.32173	1.29031	0.690108	0.233726	0.253374	0.391148	0.0466476	0.801745	0.476354	0.0574024	1.28596	8.25973	0.326712	1.23474	1.4906
ENSG00000198910.12	L1CAM	10.1781	21.6272		258.915	236.402	13.6965	32.5158	22.6361	69.2979	67.7173	12.5817	45.6043	32.5056	15.3736	3.64645	8.10624		2.97211	2.47084	1.31308	1.92552	8.19079	2.90538	9.26065	2.53903	0.293163	0.770953	11.9972	11.8434	65.603	21.1701	43.6369	4.19671	45.8641	6.59424	8.22469	2.05735	10.3485	19.8754	0.346179	0.79696	5.19068	0.432549	112.799	1.05719	0.875985	26.1948	10.8513
ENSG00000089116.3	LHX5	10.1447	99.1037		4.10163	2.94673	0.00721033	0	0	0	0	0.0133606	3.3004	0.0395257	0	0.304721	0.377895		0	0	0	0	0	0	0	0	0	0.0184282	0	0.0194892	0	0	0	0	0	0	0	0	0	0.00952643	0	0	0	0	0	0	0	0.0219867	0
ENSG00000188735.12	TMEM120B	10.0699	6.74316		86.6362	75.9228	4.14694	5.59927	14.7464	8.85334	7.29577	5.17599	6.86671	22.0758	12.6137	4.49639	3.01779		8.23705	8.74917	9.21801	10.2211	8.6177	5.58421	10.5815	10.7407	10.7539	8.13259	52.424	53.5848	9.51541	6.27068	11.7588	4.62311	10.2692	27.9712	4.11013	3.47301	8.92018	8.28556	3.94344	10.3928	13.2979	7.78227	18.3589	15.2855	8.74469	29.2535	14.2058
ENSG00000161298.17	ZNF382	10.0495	19.766		26.9092	27.7265	1.73907	3.14763	2.8576	4.84675	4.5882	1.93287	2.97162	3.82763	2.04237	2.11101	1.55863		0.54652	0.680912	1.57898	1.04057	1.3562	1.33981	1.75881	0.683999	1.14202	2.48091	1.2839	1.80809	2.62692	0.936991	2.02676	0.354112	2.18358	2.01746	1.19438	1.15745	0.745281	0.8757	0.112955	0.915962	0.634997	0.193892	1.69475	1.76012	0.39549	5.71068	1.32453
ENSG00000165138.17	ANKS6	10.0144	5.76408		51.4868	46.7532	4.20049	4.40644	4.41582	7.80372	6.77782	4.9525	5.47979	3.45944	4.08957	7.12291	6.50804		8.00635	6.6672	5.15028	12.8484	7.81941	7.85483	13.2833	6.44534	13.7466	1.58162	14.6807	15.2946	14.1659	9.13428	10.8719	9.68902	11.2839	14.4069	2.80026	1.52679	5.44732	8.41996	1.44172	11.3303	6.55257	2.36835	12.28	15.2579	5.94827	6.34452	8.13554
ENSG00000118242.15	MREG	9.94716	5.98439		36.9883	46.8456	2.24733	4.67852	3.26693	4.46632	6.87624	2.48425	4.5093	3.58417	2.36708	3.47606	3.69489		6.21124	3.13266	4.9761	1.23731	1.74289	0.86229	1.9327	10.022	2.74395	34.8774	2.25064	2.10118	1.22462	2.78776	1.02938	36.0889	0.880174	1.97032	0.473275	0.198863	2.824	5.87834	6.01814	7.69155	4.84169	0.267011	4.07574	2.25904	1.2105	13.723	2.67257
ENSG00000135299.16	ANKRD6	9.92127	6.38511		39.9191	33.6455	4.55968	5.68742	3.12634	5.9443	5.39535	2.7818	6.47371	3.44673	2.15895	3.66987	2.93602		5.95502	4.73144	2.83358	23.5352	14.1736	13.9153	6.44766	6.03568	1.16283	1.45735	8.69435	11.029	6.01183	2.79664	4.42488	3.9635	4.25729	8.16861	4.19021	2.13517	3.9525	6.76517	2.28951	7.003	6.74255	1.40171	10.4596	18.423	2.91558	6.34968	5.99752
ENSG00000165046.12	LETM2	9.89837	8.72323		12.8382	13.6554	1.08807	1.43456	1.17764	1.59008	1.81919	1.01294	1.87249	1.44895	0.935722	1.12821	1.05224		0.992955	1.50739	0.329139	1.92509	1.6187	1.54614	1.27455	1.04315	2.0846	1.54253	2.00346	2.0665	1.56703	0.841422	1.46864	0.607809	1.48905	2.10461	0.579526	0.304469	0.854383	2.10355	0.114503	1.41289	0.498314	0.111914	1.39332	1.92052	0.672687	2.69947	1.1492
ENSG00000168781.21	PPIP5K1	9.83056	8.70711		56.6868	52.9341	3.94461	6.53437	5.31905	10.9699	10.5433	3.86702	6.59238	7.55197	4.17533	5.10314	4.0327		5.03824	4.15422	9.82535	5.55965	4.85924	4.55587	7.61	5.54748	2.98979	5.98063	6.27288	7.75219	5.66079	7.55078	5.15581	7.39604	5.11339	6.78942	2.44135	1.51537	4.12479	6.15308	1.90344	4.3314	8.05387	4.19029	8.25294	7.75968	2.27531	19.8491	8.17763
ENSG00000142197.12	DOPEY2	9.75432	5.38797		33.9308	37.2854	2.07416	3.29101	4.45218	5.77029	6.06332	2.45515	3.25315	4.9515	3.50474	2.99817	1.74203		6.17234	4.03266	2.29653	5.72361	5.49846	5.03576	4.17547	5.62983	4.79125	2.36558	4.96253	4.11335	5.71128	10.2878	3.94963	15.8937	3.8423	4.34368	1.71166	2.76819	2.94929	4.06984	3.03442	6.96039	19.2245	6.33142	7.21021	3.3304	1.8889	4.56348	12.059
ENSG00000136848.16	DAB2IP	9.72076	6.75449		222.551	207.013	18.8598	28.1971	30.547	35.541	30.4561	20.7304	18.7313	25.1925	29.3949	13.1137	13.7212		34.6714	26.4673	19.3847	61.8016	53.3514	54.6677	34.8127	41.7096	10.7164	0.179211	28.9499	45.1204	56.1866	41.3967	43.7137	29.7757	43.4034	36.0411	15.8429	15.5303	23.7077	41.9109	6.70357	47.0341	25.0727	20.2464	45.9525	46.3658	9.26846	17.7101	38.2367
ENSG00000152208.12	GRID2	9.68311	54.2851		10.449	7.47759	0.692488	0.89175	1.50047	0.479556	0.731703	0.623647	1.63008	1.83568	1.09686	1.02983	0.75845		0.0157016	0.00455691	0.374489	0.0273274	0.18861	0.0484446	0.0507576	0.0103986	0	0.00700473	0.06627	0.0391886	0.0418135	0.0264237	0.0144857	0.00693233	0.00942413	0.0335804	0.0457843	0.00270846	0.00615866	0.0364845	0	0.0230973	0.0149506	0	0.112662	0.281088	0	0.0154924	0.0141956
ENSG00000196123.12	KIAA0895L	9.53153	6.29897		245.565	221.781	21.1277	32.6775	25.5771	47.8109	40.236	24.2169	29.4473	28.1998	19.1552	20.7716	16.2253		21.3488	35.0043	50.0758	21.5206	28.5025	17.7128	45.0803	28.9566	14.6228	21.8438	60.4935	71.9896	22.8678	25.5048	45.3312	24.5596	41.8036	129.741	14.7264	8.46501	29.0301	32.5855	9.75651	41.2748	23.0655	4.7662	24.5384	121.139	10.644	137.772	48.7101
ENSG00000185519.8	FAM131C	9.38712	63.7971		105.207	99.478	8.33569	11.9935	5.36654	10.1836	10.0263	7.34298	12.3797	5.15841	5.18116	31.6366	14.655		0.337001	0.231579	5.90174	0.706262	0.544894	0.457956	0.335688	0.365532	0.265211	0.179769	1.36333	1.18651	0.432717	0.354745	0.513607	1.37754	0.358129	0.94454	3.6399	2.34941	4.07389	12.7561	0.0706181	0.0811015	1.19364	0.0525559	0.363354	0.62554	1.68726	11.3663	0.379615
ENSG00000164418.19	GRIK2	9.36651	73.1718		83.7466	95.4787	7.39503	12.2989	7.12917	13.7099	14.5417	7.4372	15.958	11.6482	5.521	3.56136	3.92015		0.316326	0.361119	0.236127	0.313931	0.596975	0.415111	0.827597	0.28136	0.45521	0.00898118	2.36241	2.09024	1.4631	0.55874	1.78388	0.151691	1.13995	0.28972	3.25753	0.470023	0.671403	0.431115	0.0539594	0.134382	0.240855	0.621858	8.55063	0.369415	0.297864	9.55319	1.97383
ENSG00000172167.7	MTBP	9.31427	5.20341		12.3514	13.1075	0.946703	1.1866	1.17143	2.04772	2.14463	1.12607	1.24421	1.05	1.00512	2.14921	1.23676		2.80908	1.6947	1.07579	1.98305	2.14452	2.30253	1.89523	2.6555	4.77375	10.1643	3.82326	3.99789	1.77885	1.59313	1.45993	2.23838	1.32347	2.59564	0.690253	0.380041	0.629955	1.03507	0.414986	1.65012	1.83788	0.5422	4.39645	3.6926	0.657871	1.89513	1.92647
ENSG00000197558.11	SSPO	9.27657	13.7244		12.7085	9.25181	1.10779	1.23326	1.73474	1.94395	1.37667	1.2279	0.764831	1.09467	1.54646	2.60353	1.00972		0.555716	1.12704	0.760001	0.442841	0.626167	0.256648	0.521869	0.957233	0.0725227	0.0294007	1.89545	1.71228	0.560199	0.336675	0.546876	0.279839	0.449381	1.96042	0.29574	0.107694	1.02572	1.33687	0.529416	1.42459	0.79877	0.0529494	1.66278	1.70464	0.369471	3.08809	1.55788
ENSG00000185920.15	PTCH1	9.26888	6.405		34.9148	35.1468	3.33949	4.53093	3.72146	4.51823	4.02654	2.43632	4.6264	5.65404	2.5711	3.21613	3.54643		4.3656	2.70727	2.93833	3.62496	4.62508	5.17359	9.14385	3.46444	4.39566	4.93211	6.20647	7.2137	3.46969	6.46171	4.73005	2.11622	4.77808	7.74881	1.44629	0.955895	1.57251	2.16281	0.816602	5.01939	4.55227	0.997508	33.6377	5.75919	2.8219	5.18877	6.89224
ENSG00000196268.11	ZNF493	9.12122	5.24262		24.5846	21.7714	1.91985	2.2539	3.10607	3.57739	2.97182	2.10804	3.04782	3.93214	2.35359	3.00911	2.25085		2.54276	2.84439	4.09405	5.86511	5.21794	4.98471	5.25713	3.50482	2.26723	3.79538	6.89349	7.7874	4.68633	3.44471	4.82661	2.64563	4.68022	8.56658	2.14012	1.60959	2.79748	5.06062	0.930418	4.84766	4.6894	1.32585	6.21953	14.5102	2.8244	7.47325	6.6291
ENSG00000198039.11	ZNF273	9.0656	6.45713		35.7305	34.5191	2.44452	3.3818	5.59496	5.79008	5.50997	3.53553	4.05188	6.52561	3.24438	2.54576	2.57888		2.85309	2.16901	1.72693	2.16902	2.70062	2.041	5.3117	4.03192	1.80715	3.68843	5.64632	6.81729	7.134	3.00208	3.61656	8.7169	3.77821	10.3567	1.16049	0.417897	0.599212	1.00641	0.237474	2.6908	6.92796	0.698825	3.54675	3.67202	1.20835	6.65026	4.91524
ENSG00000058866.14	DGKG	9.01117	11.8955		56.7872	58.2191	6.48909	9.84853	3.9283	10.3702	9.99389	7.80731	7.28896	5.13891	4.08275	3.43404	5.00693		2.51728	1.86602	6.36796	2.84285	5.0568	10.2952	4.34045	1.88864	0.0475781	1.10214	5.70417	4.08162	5.45819	2.05811	34.1445	1.7277	41.6248	6.04504	4.58959	5.56641	1.17364	0.692691	0.314536	8.12993	1.14221	1.50073	3.00035	1.40307	0.267542	11.7792	1.78397
ENSG00000076344.15	RGS11	8.97476	23.4869		448.035	390.344	43.1094	63.9957	34.1542	87.4132	64.9691	43.7978	60.0254	38.0189	29.3574	84.2745	37.5141		15.3064	26.1712	5.27453	26.9379	34.8479	10.9166	19.4385	16.6167	2.71993	0.129739	10.1201	21.6104	42.4904	16.4113	35.6028	10.4659	31.3066	12.5826	23.5405	10.1899	4.5888	3.63703	1.95371	19.8719	6.91159	1.85133	87.2773	1.20993	13.0692	139.392	39.1922
ENSG00000172350.9	ABCG4	8.87949	61.5465		48.3428	41.9124	3.6996	7.81752	4.16714	14.4028	14.0813	4.00512	7.50301	5.16961	3.40005	1.29876	3.30109		0.188714	0.418291	0.255868	0.585313	0.331223	0.186687	0.278218	0.235049	0.147037	0.0342274	0.424248	0.519505	0.601996	0.387306	0.670483	1.05691	0.93663	0.581985	0.707261	0.518683	0.192588	0.543684	0.0802191	0.247813	0.130383	0.0513794	0.2223	0.258092	0.0415904	0.507668	0.557732
ENSG00000266074.8	BAHCC1	8.86772	6.20435		49.7368	42.0926	4.34254	5.71976	6.43503	9.10593	6.82694	5.25132	6.03857	7.58401	5.0408	5.25563	3.59288		9.69846	6.42009	7.53865	13.8054	11.345	13.0864	10.3943	8.82507	7.89337	0.0877661	10.2417	12.8874	8.15389	5.97573	12.9072	3.8302	12.7218	13.8376	3.02103	2.23717	3.54187	5.87669	1.98274	8.44977	5.54196	2.32411	12.1627	14.5662	3.10104	8.84331	10.038
ENSG00000142549.9	IGLON5	8.7698	116.668		129.424	126.161	11.8592	20.7196	6.22712	26.4172	27.2564	15.7772	30.2847	8.28721	5.53605	7.48784	14.1439		0.795781	2.26453	0.397613	0.198447	0.208062	0.077128	0.131321	0.901671	0.193874	0.0550354	0.187084	0.183011	1.07657	0.445273	0.310917	6.47536	0.314677	0.358904	0.119665	0.0295872	0.0832608	0.151533	1.286	0.365831	0.412526	0.0265548	0.134563	1.61026	0.0842932	2.04211	0.224586
ENSG00000173404.4	INSM1	8.7627	19.3824		28.0287	31.1522	1.66652	1.88728	5.83061	2.19775	2.44901	1.57784	5.77467	6.05827	4.80001	0.480766	1.46139		0.0527894	0	0.0673303	0	0	0	0	0.0270986	0	0.0316745	0	0	0.222621	0.607521	0.0180346	0.0161561	0	0	0	0	0	0.00915084	0	0.0272826	0.0243608	0	0	0	1.27781	53.2823	0.121659
ENSG00000154370.15	TRIM11	8.72199	6.28988		40.4935	39.2651	2.65648	3.8184	7.58161	7.06609	5.75991	3.60233	4.15709	8.28156	5.55128	3.17606	1.84216		4.99007	5.14074	4.76976	5.44846	5.41334	5.38246	6.57648	5.74896	7.239	9.04331	8.44828	8.85566	5.04665	6.07854	5.29284	8.47962	5.08076	9.80722	2.25149	1.44561	3.18942	4.76687	2.1149	7.70118	8.43028	1.12334	6.56287	7.89212	2.4584	5.53679	9.50766
ENSG00000162931.11	TRIM17	8.69541	18.0044		48.0636	42.7105	2.48492	4.72435	10.9975	10.9015	7.50423	3.76929	3.14635	14.3309	6.9809	0.794694	0.541514		0.286104	1.35962	0.657727	0.508399	0.671116	0.298166	1.43128	1.96901	0.490642	0.511622	2.65408	3.80569	0.474231	0.536868	0.686352	1.2617	0.529188	2.71672	0.739664	0.163255	1.41632	1.89222	0.0719044	1.56638	3.55606	0.046966	1.86787	3.64992	0.240875	0.843681	3.52637
ENSG00000167371.17	PRRT2	8.6444	17.4288		606.41	563.425	55.5186	91.8252	94.2682	152.459	167.153	52.4638	48.1865	102.369	63.0929	13.9654	12.6635		14.8643	8.8712	11.2405	69.7746	47.0137	58.2928	45.9813	13.0934	4.15115	1.04017	106.062	111.499	42.1038	22.8433	41.245	5.31307	35.3657	79.2224	9.59429	2.65486	5.10586	9.88904	1.10632	18.43	5.48223	2.09262	67.5407	183.152	2.05794	122.512	48.8307
ENSG00000188322.4	SBK1	8.63343	47.9803		87.4837	67.4758	10.8391	17.7743	5.51985	20.6925	22.1184	13.1439	9.68432	6.34215	4.31788	4.64044	6.95094		0.233569	0.283971	3.91502	0.384997	0.254347	0.146092	0.226274	1.4078	0.0251153	0.126672	0.939653	1.74438	0.335874	0.472696	0.2622	1.01029	0.321994	0.365013	0.454628	1.20327	1.19333	2.52716	0.169033	1.60051	4.07362	8.21957	0.712045	1.13398	1.35828	12.397	2.91424
ENSG00000158220.13	ESYT3	8.59398	5.82007		12.3395	11.7955	1.0939	1.69729	1.23372	2.93495	2.60777	0.900213	2.28789	1.86657	0.787888	0.87877	1.0043		0.164588	0.203615	0.125425	1.20523	0.562211	0.310232	1.09028	0.539557	0.655239	0.0112671	1.32511	1.68201	6.62279	1.34781	0.43682	0.598003	0.371186	1.09346	0.496156	0.304404	0.562757	1.12695	0.0600666	11.0471	0.512013	0.404285	3.70118	1.03031	0.703878	3.69878	0.429224
ENSG00000186472.19	PCLO	8.55502	33.8397		32.2288	32.0291	2.56208	4.32547	3.54861	5.09213	7.88974	3.03424	3.45755	6.33522	2.47667	2.36745	1.67537		0.306316	0.254065	1.18007	0.240359	0.160231	0.340493	0.280254	0.954094	0.0188968	0.0127073	0.646558	0.621425	0.358646	0.718626	0.367306	1.11485	0.396021	0.280524	0.434244	0.216218	1.42367	1.90785	0.0425799	0.44198	1.36641	0.0252855	0.109264	0.546982	0.812711	9.43341	2.01678
ENSG00000116793.15	PHTF1	8.49944	6.8846		35.2666	35.1336	2.8447	4.41349	3.95685	7.56584	7.55771	3.44471	6.14803	4.78136	2.78373	2.71211	2.85016		4.81194	4.9747	5.71041	4.66896	4.66537	3.94093	3.8682	3.84695	8.1495	12.7844	5.52103	6.25415	4.64707	3.43954	3.10075	1.72225	3.42104	5.09245	2.06675	1.68772	2.87453	4.99264	1.86838	8.30649	3.4752	1.80516	5.00869	3.76228	2.43242	13.2432	4.47933
ENSG00000109089.7	CDR2L	8.08632	8.94181		128.156	118.867	8.38328	6.91754	9.74643	12.5129	12.3486	15.0142	13.123	6.66711	11.9791	53.7621	20.5436		13.667	15.5385	8.04245	26.0041	22.4687	23.1008	17.9185	15.5639	31.9466	0.109058	26.1438	23.3264	19.8455	10.1106	20.8671	9.71816	18.9329	17.0508	11.7471	11.1433	9.96449	16.2092	0.962933	27.8441	14.1461	1.54315	14.5332	6.51514	2.84595	11.8473	15.0784
ENSG00000158458.19	NRG2	7.91987	8.09942		20.8884	20.1822	1.84462	2.45697	3.24462	3.12206	2.93963	2.06732	2.96743	3.92756	2.62246	2.32453	1.97952		2.88919	3.15777	4.11403	1.78685	1.92384	1.65816	4.51023	4.21087	0.170265	0.604322	5.09556	6.90017	3.37854	1.20238	2.142	1.48807	2.03915	2.93846	0.617652	0.739181	0.61551	0.376138	0.0784019	0.612212	6.48432	2.78028	1.65816	10.3306	1.33192	5.76743	4.00675
ENSG00000168939.11	SPRY3	7.91283	6.38		8.27514	7.71485	0.825928	1.09983	1.054	1.4256	1.39477	0.916747	1.15967	1.24101	0.803763	1.13945	0.822708		1.89044	1.67024	1.71873	1.89297	1.33165	1.27601	1.61761	1.80399	1.23566	0.301421	1.98166	2.05023	1.54188	1.32936	1.20449	1.08277	1.15718	1.65787	0.691345	0.531285	0.749592	0.655395	0.494063	1.652	1.37967	0.745105	1.38815	2.15843	0.358361	1.80532	1.49803
ENSG00000167968.12	DNASE1L2	7.86016	6.40347		36.4235	30.0359	3.31494	4.5888	4.73864	8.94674	5.8075	3.77985	6.2249	5.30375	4.02262	5.0186	3.53976		0.790327	1.32623	1.35902	1.08718	1.34467	0.654836	1.78427	1.65046	1.14984	1.35286	3.13405	3.17755	1.69403	1.38917	1.38335	1.17815	1.3987	2.43223	0.543149	0.438311	2.21645	6.1706	1.14982	1.60209	1.39548	0.543907	3.83318	2.83874	1.29149	9.9862	4.43464
ENSG00000178538.9	CA8	7.6178	17.3525		38.1067	11.2982	7.0085	5.65437	9.05513	3.98477	5.51163	2.66208	4.77957	7.11703	4.42404	1.29539	2.5155		2.55407	2.87923	0.993777	0.337786	0.741315	0.662851	1.41744	5.63937	0.0155414	0.0282479	0.408362	1.44461	2.44009	2.26426	2.0181	0.262569	2.08539	1.76402	3.20738	2.23055	2.92534	2.25807	0.0291175	2.02077	1.53979	1.10594	1.81662	0.272797	0.670196	15.4912	2.45619
ENSG00000104327.7	CALB1	5.10384	34.3081		107.252	34.2959	4.01554	8.34578	47.7607	7.56113	11.5392	3.70978	29.0223	79.3944	22.2924	2.72894	1.33085		0.136587	0.0764473	0.334754	0.0913633	0.110422	0.112372	0.0872835	0.134498	0.0621771	0.052254	0.271675	0.284294	0.304663	0.169975	0.146163	0.0800537	0.133522	0.2147	0.0671557	0.0570091	82.9785	33.1983	0.0511143	0.144023	0.0901432	0.0617509	0.323717	0.252954	0.0925931	6.05588	0.0991936
aTPM from GTEx database (see Methods). Preferential expression of a gene in cerebellum is defined as the gene having a ratio of the TPM in cerebellum to the average TPM of the 41 nonbrain tissues ≥ 5, TPM in cerebellum to the average TPM of 10 other brain regions of ≥ 5, and a TPM in cerebellum of ≥ 1. For the average TPM of non-cerebellar brain tissues, frontal cortex was used but not cortex bec…
bThe first 20 genes shown are the Myob/Cbl genes and their data is indicated in purple font.
cTwo brain regions were not used for the average TPMs, namely, cerebellum hemisphere and brain cortex, because these regions had TPMs very similar to those of cerebellum and prefrontal cortex, respectively. Cervical spinal cord is grouped with brain regions.
[truncated: 10 more columns]

## Sheet: Table S3 Brain region expr
Table S3. Genes preferentially expressed in various brain regionsa
Amygdala	Anterior cingulate cortex	Caudate (basal ganglia)	Cerebellar Hemisphere	Cerebellum	Cortex	Frontal Cortex (BA9)	Hippocampus	Hypothalamus	Nucleus accumbens (basal ganglia)	Putamen (basal ganglia)	Spinal cord (cervical)	Substantia nigra
A. Number of genes with preferential expression in the given brain region
0	2	3	434	489	3	12	0	4	7	0	138	0
B. Gene names
	KLK7	CA12	ABLIM1	ABCA10	CUX2	ATRNL1		GABRE	C6orf141		ABCA6
	SLN	RGS14	ACRBP	ABCA5	HAPLN4	CABP1		IGSF1	COCH		ABCA8
		TAC1	ADAM11	ABCC8	FAM163B	CHGA		LHX5	DRD2		ABTB2
			ADAM22	ABCG4		CUX2		RAB3B	NNAT		ADAMTS4
			ADAMTS16	ABLIM1		ENC1			PENK		AGPAT4
			ADAMTS18	ACRBP		KRT17			POU3F4		ANLN
			ADAMTS5	ADAM11		LDB2			PTPN5		APLNR
			ADARB1	ADAMTS16		MEF2C					ARRDC4
			AFF2	ADAMTS18		NCALD					ATP10B
			ALOX5	ADAMTS5		PRSS16					BCAS1
			ALS2	ADAMTSL1		RGS4					BOK
			ANK1	ALOX5		STAT4					C10orf128
			ANKLE1	ALOXE3							C21orf91
			ANKRD18B	ALS2							C2orf82
			ANKS6	ANK1							CA14
			AQP3	ANKLE1							CAPN3
			ARHGEF10L	ANKRD18B							CARNS1
			ARVCF	ANKRD36							CCNE2
			ASB16	ANKRD6							CD37
			ATP4A	ANKS6							CD44
			AVIL	ANKZF1							CD74
			BANK1	AP1G2							CDC42EP1
			BDKRB1	AQP3							CDK18
			BDKRB2	ARHGEF10L							CDKN1C
			BDNF	ARSJ							CLDN11
			BEST3	ARTN							CLDND1
			BMP4	ARVCF							CNP
			BMPER	ASB16							CNTN2
			BTG1	ATAD5							COL18A1
			BTN2A2	ATP2A3							COL4A5
			BX470102.3	ATP4A							CPXM2
			C11orf52	ATP8B2							CRYAB
			C16orf86	AVIL							CTNNA3
			C1orf132	BAHCC1							CTSS
			C3orf35	BCL9L							CXCR4
			CA10	BDKRB1							DBNDD2
			CA4	BDKRB2							DHCR24
			CA9	BMP1							DNAH17
			CACNA1A	BTN2A2							EDIL3
			CADPS2	BX470102.3							ELOVL1
			CALN1	C11orf52							ENPP2
			CAMK2D	C15orf62							ERMN
			CAMK4	C16orf86							EVI2A
			CAMKK2	C1orf127							EVI2B
			CASP12	C1orf132							FA2H
			CATSPER2	CA4							FAM124A
			CATSPERG	CA8							FAM178B
			CBFA2T3	CA9							FBXO32
			CBLB	CACNA1A							FCER1G
			CBLN1	CACNA1G							FGFR2
			CBLN3	CADPS2							FLNC
			CCDC88B	CALB1							FNTB
			CCNG2	CAMK4							GAL3ST1
			CCNJL	CAMKK2							GAS2
			CDC42BPG	CASP12							GJC2
			CDH15	CATSPER2							GLDN
			CDH23	CATSPERG							GLTP
			CDON	CBFA2T3							GPR37
			CECR2	CBLB							HCLS1
			CERKL	CBLN1							HIST1H2AE
			CGN	CBLN3							HIST1H3E
			CHAD	CCDC144A							HN1L
			CHD7	CCDC88B							HSPA2
			CHGB	CCNJL							IFI30
			CHN2	CDC42BPG							ITGAX
			CHRD	CDCA3							KLK6
			CHRNA6	CDH15							LAPTM5
			CITED2	CDH23							LDB3
			CKMT1B	CDON							LGALS3BP
			CLCNKA	CDR2L							LHPP
			CLCNKB	CECR2							LIPA
			CLDN3	CEL							LIPE
			CLDN9	CELSR3							MAN2A1
			CLEC4G	CENPJ							MBP
			CLGN	CERKL							MOBP
			CLK4	CFLAR							MOSPD2
			CNPY1	CGN							MTMR10
			CNTD2	CHD7							MYLK
			COL13A1	CHGB							MYO1D
			COL27A1	CHN2							MYO1E
			COL6A1	CHRD							NDE1
			COL8A2	CHRNA3							NGFR
			COMP	CKMT1B							NINJ2
			CORO2A	CLCNKA							PADI2
			CPNE9	CLCNKB							PAQR4
			CPVL	CLDN3							PAQR6
			CRHR1	CLDN9							PARVG
			CROCCP2	CLEC4G							PCSK6
			CROCCP3	CLK4							PKP4
			CST6	CLMP							PLCL1
			CYP26B1	CNNM4							PLIN3
			DAB1	CNPY1							PLP1
			DAB2IP	CNTD2							PPP1R14A
			DACT1	COL13A1							PRIMA1
			DEGS2	COL19A1							PRR5L
			DGKD	COL22A1							PRRG1
			DGKG	COL27A1							RAI14
			DHDDS	COL6A1							RAPGEF5
			DHRS13	COL8A2							RASSF2
			DISP2	COMP							RBM11
			DOC2GP	CORO2A							RBP7
			DOK7	CPNE9							RELL1
			DOPEY2	CPT1B							RGS1
			DPF3	CPVL							RHOG
			DUOX1	CRHR1							S100B
			DUSP5	CROCCP2							S1PR5
			EBF1	CROCCP3							SAMD4A
			EEF2K	CTC1							SCD
			ELL3	CTRB1							SEMA4D
			ELMO3	CYP26B1							SGK2
			ELN	DAB2IP							SHROOM4
			EN2	DACT1							SKAP2
			EPB41	DEFB1							SLAIN1
			EPHA1	DEGS2							SLC31A2
			EPS8L2	DGCR8							SLC44A1
			ESPN	DGKD							SLC45A3
			ESPNL	DGKG							SLC6A9
			ETV1	DHDDS							SPP1
			EXPH5	DISP2							ST6GALNAC3
			EZH2	DNASE1L2							STON1
			FAAH2	DNMT3B							SYNJ2
			FADS6	DOC2GP							SYPL1
			FAM131C	DOK7							TBC1D12
			FAM153C	DOPEY2							TGFA
			FAM160A1	DOT1L							TMC6
			FAM72B	DUOX1							TMEM125
			FANCC	DUSP5							TMEM144
			FAT2	EBF1							TMEM206
			FBXO31	EEF2K							TMEM63A
			FBXW10	ELL3							TMEM88B
			FGF5	ELMO3							TNFRSF21
			FGFR4	ELN							TP53INP2
			FOXN3	EME2							TRAK2
			FREM1	EN2							TREM2
			FSTL5	EPB41							UGT8
			FUT1	EPHA1							WIPF1
			FUT2	EPHB3							ZDHHC20
			FZD7	EPS8L2							ZNF488
			GABRD	ESPN
			GALNT12	ESPNL
			GALNT5	ESYT3
			GALNT9	ETV1
			GDNF	EXPH5
			GFRA3	EZH2
			GINS1	FAM131C
			GLCCI1	FAM153C
			GLCE	FAM160A1
			GLS2	FAM166A
			GNB3	FANCC
			GNRH1	FAT2
			GOLGA8A	FBXL6
			GPATCH8	FBXL8
			GPHA2	FBXO31
			GPLD1	FBXW10
			GPR137C	FGF5
			GPRC5C	FGFR4
			GPRIN2	FNDC5
			GRAMD1B	FREM1
			GRB7	FUT1
			GRIK2	FZD7
			GRM4	GABRD
			HCG27	GALNT12
			HELLS	GALNT5
			HES7	GALNT9
			HIST2H2BA	GDNF
			HIST3H2A	GDPD3
			HIST3H2BB	GDPD5
			HPCAL1	GFRA3
			HPX	GJB3
			HS3ST1	GLCE
			IFNE	GLI1
			IGF2BP2	GNB3
			IGSF9B	GNG13
			IL11	GOLGA8A
			IL16	GPATCH8
			IL17RE	GPHA2
			INPP5J	GPLD1
			INSM1	GPRC5C
			IRF6	GPRIN2
			ITGA4	GRAMD1B
			ITPRIPL1	GRB7
			KCNA1	GRID2
			KCNAB3	GRID2IP
			KCND1	GRIK2
			KCND2	GRIN3B
			KCNJ12	GRM4
			KCNK1	HADHAP1
			KCP	HCN3
			KCTD14	HELLS
			KDM4C	HES7
			KIAA0895	HIST2H2BA
			KIAA1024	HIST3H2BB
			KIAA1614	HMGA1P2
			KLF11	HPX
			KLHL3	HS3ST1
			KLK10	HSPB7
			KRT18	IDUA
			KRT19	IFFO2
			KRT31	IFNE
			LAMA5	IGF2BP2
			LAMC2	IGLON5
			LBX1	IGSF9B
			LDLRAP1	IL11
			LEAP2	IL16
			LEMD1	IL17RE
			LETM2	IL7
			LHX1	INPP5J
			LIMA1	INSM1
			LIN7A	IRF6
			LMNB1	ITGA4
			LONRF3	ITPR1
			LRCH1	ITPRIPL1
			MAB21L1	JMJD1C
			MAMDC4	JMJD7
			MAML3	KCNAB3
			MAP1LC3B2	KCNC3
			MAPKBP1	KCND1
			MDGA1	KCNJ12
			MEGF11	KCP
			MEIS1	KCTD14
			MFSD9	KDM4C
			MICAL2	KDM6B
			MIXL1	KIAA0895L
			MMP24	KIAA1024
			MORN1	KIAA1614
			MPP3	KIAA1683
			MPP4	KLHL3
			MPP7	KLK10
			MPZL3	KRT13
			MREG	KRT18
			MRGPRF	KRT19
			MTBP	KRT31
			MYO5C	KRT4
			MYT1	L1CAM
			NBPF15	LAG3
			NBPF20	LAMA5
			NBPF8	LAMC2
			NBPF9	LBX1
			NEUROD2	LCAT
			NHLH2	LDLRAP1
			NHSL2	LEAP2
			NKAIN1	LEMD1
			NPFF	LETM2
			NPTX1	LHX1
			NR4A2	LHX4
			NRG4	LHX5
			NRIP2	LIMA1
			NRXN3	LIPG
			NTF3	LMNB1
			NUAK2	LONRF3
			NUP85	LPCAT3
			NUS1P2	LRCH1
			NXPH3	LRRC45
			NXPH4	LTB4R2
			NYNRIN	LY6G5B
			ORC1	MAB21L1
			OTX2	MAMDC4
			P2RX4	MAML3
			P4HA3	MAP1LC3B2
			PAG1	MAP3K12
			PAX3	MAPKBP1
			PAXIP1	MCF2L
			PCBP3	MDGA1
			PCDHA10	MEGF11
			PCDHA11	MEIS1
			PCDHA12	MFSD9
			PCDHA13	MICAL2
			PCDHGC4	MIXL1
			PCLO	MLXIPL
			PCOLCE	MMP24
			PCP2	MORN1
			PCSK9	MPP3
			PDE1A	MPP4
			PDE3B	MPZL3
			PDIA2	MREG
			PHTF1	MRGPRF
			PIK3R3	MSX2
			PIP5K1B	MTBP
			PISD	MXD4
			PKD1	MYO5C
			PKD1P6	MYT1
			PKIB	NBEAL1
			PKLR	NBPF15
			PKN3	NBPF20
			PLA2G4B	NBPF8
			PLA2R1	NBPF9
			PLCB4	NEUROD2
			PLD5	NISCH
			PLEKHG5	NKAIN1
			PLGLB1	NPR2
			PLXNB2	NPTX1
			POLB	NRG2
			POLE	NRG4
			PPFIA4	NRIP2
			PPIP5K1	NRK
			PPM1D	NTF3
			PRSS8	NUAK2
			PTCH1	NXPH3
			PTCHD1	NXPH4
			PTPRR	NYNRIN
			PVALB	OBSCN
			PYDC1	OTX2
			RAB37	P2RX4
			RAB3IP	P4HA3
			RBFOX3	PAG1
			RCAN3	PAX3
			RELN	PAXIP1
			REV1	PCBP3
			RHBG	PCDHA12
			RIMS1	PCDHA2
			RMND5A	PCDHGC4
			RORC	PCLO
			RSPO3	PCOLCE
			RUNX1T1	PCP2
			S100A7	PCSK9
			SCNN1B	PDE3B
			SCNN1G	PDIA2
			SDR9C7	PDXDC2P
			SEL1L3	PHTF1
			SEMA6C	PILRB
			SFI1	PISD
			SGCA	PKD1
			SH3GL2	PKD1P6
			SHF	PKIB
			SHISA8	PKLR
			SHROOM3	PKN3
			SKA1	PLA2G4B
			SKI	PLA2R1
			SLC22A20	PLCB4
			SLC25A34	PLCH2
			SLC26A10	PLEKHG5
			SLC34A2	PLGLB1
			SLC36A1	PLXNA3
			SLC46A2	PLXNB2
			SLC5A5	POLB
			SLC8A2	POLE
			SLIT3	PPFIA4
			SNAI2	PPIP5K1
			SNAP25	PRL
			SOCS1	PRRT2
			SOCS5	PRSS22
			SOCS7	PRSS53
			SP6	PRSS8
			SPINT1	PTCH1
			SPOCK1	PTCHD1
			SPON2	PTPRR
			SPTB	PVALB
			SPTBN5	QSOX2
			SRGAP2	RAB37
			SRRM3	RANBP10
			SRRM4	RASSF7
			SSTR2	RBFOX3
			ST8SIA5	RCAN3
			STAC	RELN
			STARD5	REV3L
			STK10	RGL4
			STRC	RGS11
			STRCP1	RHBG
			STXBP5L	RIMKLBP2
			SVEP1	RORC
			SYNE2	RUNX1T1
			SYT2	S100A7
			SYT4	SBK1
			SYTL1	SCARNA13
			TARBP2	SCNN1B
			TBC1D9	SCNN1G
			TCF19	SDR9C7
			TFAP2A	SEC31B
			TFAP2E	SEL1L3
			TGM1	SEMA4G
			TIAM1	SEMA6C
			TIFA	SFI1
			TLE2	SGCA
			TLL1	SHF
			TMEM120B	SHISA8
			TMEM145	SHROOM3
			TMEM159	SKA1
			TMEM163	SKI
			TMEM51	SLC1A6
			TMEM61	SLC22A20
			TMEM63C	SLC25A34
			TNFRSF25	SLC26A10
			TNK1	SLC29A2
			TNXB	SLC34A2
			TP73	SLC36A1
			TRANK1	SLC46A2
			TRHDE	SLC5A5
			TRIM11	SLC8A2
			TRIM3	SLC9A3
			TRIM32	SLX4
			TRIM55	SMARCD2
			TRIM7	SMPDL3B
			TRIM72	SMPX
			TRIM74	SNAI2
			TSGA10IP	SOCS1
			TSPAN1	SP6
			TSPAN18	SPINK6
			TSPAN9	SPINT1
			TSSK3	SPON2
			TTC39B	SPRR3
			TUBA8	SPRY3
			UBASH3B	SPTB
			UBTD2	SPTBN5
			ULBP1	SRGAP2
			USP28	SRRM3
			USP3	SRRM4
			USP44	SSPO
			USP45	ST8SIA5
			VAX2	STAC
			VTN	STARD5
			VWC2	STK10
			WDR76	STRC
			WFIKKN1	STRCP1
			WSCD2	STXBP5L
			XKR7	SVEP1
			ZBTB46	SYT2
			ZFPM2	SYTL1
			ZFYVE28	TARBP2
			ZIC1	TAS2R5
			ZIC2	TCF19
			ZIC3	TFAP2A
			ZIC5	TFAP2E
			ZNF157	TGM1
			ZNF273	TIAM1
			ZNF300P1	TIMP4
			ZNF337	TLE2
			ZNF382	TLL1
			ZNF385B	TLR9
			ZNF385D	TMEM120B
			ZNF521	TMEM145
			ZNF556	TMEM151B
			ZNF600	TMEM200B
			ZNF702P	TMEM61
			ZNF816	TMEM63C
				TNFRSF25
				TNK1
				TNXB
				TP53I11
				TP73
				TRANK1
				TRIM11
				TRIM17
				TRIM3
				TRIM55
				TRIM7
				TRIM72
				TRIM73
				TRIM74
				TSGA10IP
				TSPAN1
				TSPAN11
				TSPAN18
				TSPAN9
				TSSK3
				TUBA8
				UBASH3B
				UCKL1
				ULBP1
				USP3
				USP44
				VAX2
				VTN
				VWC2
				WFIKKN1
				WSCD2
				XKR7
				ZBTB46
				ZFPM2
				ZFYVE28
				ZIC1
				ZIC2
				ZIC3
				ZIC5
				ZNF221
				ZNF273
				ZNF300P1
				ZNF337
				ZNF382
				ZNF385C
				ZNF493
				ZNF521
				ZNF551
				ZNF556
				ZNF600
				ZNF618
				ZNF702P
aAll genes preferentially expressed in the given brain region had a TPM expression ratio of ≥5 and a TPM in that brain region of ≥1. Cervical spinal cord is grouped with brain regions.

## Sheet: Table S4. GO MyobCbl genes
Table S4. Gene Ontology (GO) associations for individual genes preferentially expressed in both myoblasts and cerebelluma
ID	Gene Name	FPKM in Myoblasts	TPM in Skeletal Muscle	GOTERM_BP_DIRECT	KEGG_PATHWAY	OMIM_Or KW_DISEASE	UP_KW_MOLECULAR_FUNCTION	Proposed Rationale for Preferential Expression in Both Myoblasts and Cerebellum (statements without PubMed IDs are from GeneCards: https://www.genecards.org/; tissue expression is from https://gtexportal.org/; underlined statements are our hypotheses, where appropriate)
ANK1	ankyrin 1	29.3881	36.9679	GO:0006887~exocytosis,GO:0006888~ER to Golgi vesicle-mediated transport,GO:0007010~cytoskeleton organization,GO:0007165~signal transduction,GO:0010638~positive regulation of organelle organization,GO:0045199~maintenance of epithelial cell apical/basal polarity,GO:0051179~localization,GO:0072659~protein localization to plasma membrane	hsa05205:Proteoglycans in cancer,	182900~Spherocytosis, type 1,		This gene codes for a component of the ankyrin-1 complex, a multiprotein complex involved in the stability and shape of the erythrocyte membrane, which attaches integral membrane proteins to cytoskeletal elements. Together with obscurin in skeletal muscle, an isoform of the encoded protein may provide a molecular link between the sarcoplasmic reticulum and myofibrils. ANK1, which is present in Pu…
CDH15	cadherin 15	163.714	34.4928	GO:0000902~cell morphogenesis,GO:0007043~cell-cell junction assembly,GO:0007155~cell adhesion,GO:0007156~homophilic cell adhesion via plasma membrane adhesion molecules,GO:0007275~multicellular organism development,GO:0016339~calcium-dependent cell-cell adhesion via plasma membrane cell adhesion molecules,GO:0034332~adherens junction organization,GO:0044331~cell-cell adhesion mediated by cadherin…	hsa04514:Cell adhesion molecules;	612580~Intellectual developmental disorder, autosomal dominant 3,		This gene is a member of the cadherin superfamily of genes, encoding calcium-dependent intercellular adhesion glycoproteins. Important in special cell-cell contacts for myoblasts and brain (PMID: 1840697 & 19012874).
CHRD	chordin(CHRD)	4.49101	4.89014	GO:0001501~skeletal system development,GO:0002053~positive regulation of mesenchymal cell proliferation,GO:0007389~pattern specification process,GO:0009790~embryo development,GO:0009953~dorsal/ventral pattern formation,GO:0021513~spinal cord dorsal/ventral patterning,GO:0021919~BMP signaling pathway involved in spinal cord dorsal/ventral patterning,GO:0030336~negative regulation of cell migration…	hsa04350:TGF-beta signaling pathway,		KW-0217~Developmental protein,KW-9996~Developmental protein,	This gene encodes a secreted protein that dorsalizes early vertebrate embryonic tissues by binding to ventralizing TGF-beta-like bone morphogenetic proteins and sequestering them in latent complexes. It is associated with the GO term GO:0030336~negative regulation of cell migration. Cell migration is critical during brain development and myoblast cell fusion. The role of CHRD in cell migration du…
CNPY1	canopy FGF signaling regulator 1(CNPY1)	2.26662	0.023755	none				CNPY1 is expressed in the midbrain-hindbrain boundary in zebrafish, binds FGFR1, and plays a role in FGF signaling. FGF signaling also plays a major role in myogenesis (PMID: 19022756).
DOK7	docking protein 7(DOK7)	44.6947	19.6664	GO:0007528~neuromuscular junction development,GO:0061098~positive regulation of protein tyrosine kinase activity; localized mostly to the nucleus, mitochondrion, and plasma membrane; KW-0770~Synapse		254300~Myasthenic syndrome, congenital, 10,618389~Fetal akinesia deformation sequence 3,		The protein encoded by this gene is an activator of MUSK and acetylcholine receptor (AchR) clustering in myotubes. It is essential for neuromuscular synaptogenesis. It also functions in aneural activation of muscle-specific receptor kinase, which is required for postsynaptic differentiation, and in the subsequent clustering of the acetylcholine receptor in myotubes. DOK7 is differentially regulat…
EN2	engrailed homeobox 2(EN2)	3.11753	0.228506	GO:0006357~regulation of transcription from RNA polymerase II promoter,GO:0007275~multicellular organism development,GO:0030182~neuron differentiation,GO:0030901~midbrain development,GO:0030902~hindbrain development,GO:0043524~negative regulation of neuron apoptotic process,GO:0045944~positive regulation of transcription from RNA polymerase II promoter,GO:0048666~neuron development,GO:0071542~dop…		KW-1268~Autism spectrum disorder,KW-1269~Autism,	KW-0217~Developmental protein,KW-0238~DNA-binding,KW-9996~Developmental protein,	This gene encodes homeobox TF that is implicated in the control of pattern formation during development of the central nervous system. EN2 is involved in the development of small neurons called granule cells, which comprise 99% of all cerebellar neurons (PMID: 33519389). It inhibits glioma cell proliferation and invasion (PMID: 32158355). An enhancer region upstream of the TSS in mice directs exp…
FNDC5	fibronectin type III domain containing 5(FNDC5)	64.0457	68.9299	GO:0007165~signal transduction,GO:0014850~response to muscle activity,GO:0090336~positive regulation of brown fat cell differentiation; localized mostly to plasma membrane, extracellular space, and endoplasmic reticulum			KW-0372~Hormone,	This gene encodes a secreted protein (myokine) that may be released from muscle cells during exercise. It is expressed in Purkinje neurons in rats,and expression increases upon spinal cord injury (PMID: 29907375). Its role as a restorative myokine and response to nerve injury may be asssociated with its preferential expression in both myoblasts and cerebellum.
IL11	interleukin 11(IL11)	6.01454	0.0184578	GO:0008283~cell proliferation,GO:0008284~positive regulation of cell proliferation,GO:0030183~B cell differentiation,GO:0030219~megakaryocyte differentiation,GO:0033138~positive regulation of peptidyl-serine phosphorylation,GO:0038154~interleukin-11-mediated signaling pathway,GO:0043410~positive regulation of MAPK cascade,GO:0045444~fat cell differentiation,GO:0045944~positive regulation of trans…	hsa04060:Cytokine-cytokine receptor interaction,hsa04630:JAK-STAT signaling pathway,hsa04640:Hematopoietic cell lineage,hsa05323:Rheumatoid arthritis,		KW-0202~Cytokine,KW-0339~Growth factor,	The protein encoded by this gene is a member of the gp130 family of cytokines. It stimulates the T-cell-dependent development of immunoglobulin-producing B cells, the proliferation of hematopoietic stem cells and megakaryocyte progenitor cells, and of hepatocytes in response to liver damage. It inhibits the differentiation of myoblasts to multinucleated myotubes (PMID: 36328118). It is also impli…
KCNJ12	potassium inwardly rectifying channel subfamily J member 12(KCNJ12)	4.5074	25.0433	GO:0006813~potassium ion transport,GO:0006936~muscle contraction,GO:0008016~regulation of heart contraction,GO:0034765~regulation of ion transmembrane transport,GO:0051289~protein homotetramerization,GO:1990573~potassium ion import across plasma membrane	hsa04725:Cholinergic synapse,hsa04921:Oxytocin signaling pathway,		KW-0407~Ion channel,KW-0851~Voltage-gated channel,	This gene encodes a protein, an inward rectifying potassium channel, that is activated by phosphatidylinositol 4,5-bisphosphate. It probably participates in controlling the resting membrane potential in electrically excitable cells and in establishing the action potential waveform and excitability of neuronal and muscle tissues. This shared excitability function may explain preferential expressio…
LBX1	ladybird homeobox 1(LBX1)	1.10104	9.73664	GO:0001947~heart looping,GO:0006357~regulation of transcription from RNA polymerase II promoter,GO:0007517~muscle organ development,GO:0008283~cell proliferation,GO:0008285~negative regulation of cell proliferation,GO:0009653~anatomical structure morphogenesis,GO:0021522~spinal cord motor neuron differentiation,GO:0045665~negative regulation of neuron differentiation,GO:0048664~neuron fate determ…		619483~Central hypoventilation syndrome, congenital, 3,	KW-0217~Developmental protein,KW-0238~DNA-binding,KW-9996~Developmental protein,	This homeobox TF is a key regulator of muscle precursor cell migration. It is also required for the development of GABAergic interneurons in the dorsal horn of the spinal cord. Spinal cord preferentially expresses this gene but cerebellum has a stronger expression. In midgestation human fetuses, this gene is expressed specifically in interneurons of the cerebellum, myocytes, and muscle satellite …
MCF2L	MCF.2 cell line derived transforming sequence like	20.5444	3.14899	GO:0035025~positive regulation of Rho protein signal transduction,GO:0035556~intracellular signal transduction,GO:0051056~regulation of small GTPase mediated signal transduction,GO:1902531~regulation of intracellular signal transduction; localized mostly to plasma membrane, cytosol, and extracellular space			KW-0344~Guanine-nucleotide releasing factor,	This gene encodes a guanine nucleotide exchange factor that interacts specifically with the GTP-bound Rac1 and plays a role in the Rho/Rac signaling pathways. MCF2L/DBS also is a player in the PI3K/mTOR pathway in cancer (PMID: 36330204) and regulates breast cancer cell migration PMID: 19366686). This little-studied gene might play a role in cell migration in brain and skeletal muscle development.
MPP4	MAGUK p55 scaffold protein 4	9.42266	0.065131	GO:0035418~protein localization to synapse	hsa04530:Tight junction,			This gene encodes a membrane-associated guanylate kinase localized to the outer limiting membrane in the retina. It is required for proper localization of plasma membrane calcium ATPase and calcium homeostasis in rod photoreceptor synaptic terminals (PMID: 17341488).
PAX3	paired box 3(PAX3)	1.14924	0.991746	GO:0006355~regulation of transcription, DNA-templated,GO:0006357~regulation of transcription from RNA polymerase II promoter,GO:0006915~apoptotic process,GO:0007399~nervous system development,GO:0007517~muscle organ development,GO:0007605~sensory perception of sound,GO:0009887~animal organ morphogenesis,GO:0045893~positive regulation of transcription, DNA-templated,GO:0045944~positive regulation …	hsa05202:Transcriptional misregulation in cancer,	122880~Craniofacial-deafness-hand syndrome,148820~Waardenburg syndrome, type 3,193500~Waardenburg syndrome, type 1,268220~Rhabdomyosarcoma 2, alveolar; Waardenburg syndrome includes sensorineural hearing loss, hypo- and hyperpigmentation of the skin, skeletal and cardiac muscle abnormalities and neural tube defects	KW-0217~Developmental protein,KW-0238~DNA-binding,KW-9996~Developmental protein,	This gene encodes a homeobox- and paired box-containing TF that may regulate cell proliferation, migration and apoptosis. Involved in neural development and myogenesis. Pax3 RNA is first seen at mouse embryonic day 8.5 in the pre-somitic paraxial mesoderm before formation of somite, and in the dermomyotome at the somite stage (PMID: 29730428). Later, when muscle precursor cells form differentiate…
PLCB4	phospholipase C beta 4(PLCB4)	53.6689	1.88236	GO:0007186~G-protein coupled receptor signaling pathway,GO:0016042~lipid catabolic process,GO:0035556~intracellular signal transduction,GO:0048015~phosphatidylinositol-mediated signaling,GO:0051209~release of sequestered calcium ion into cytosol	hsa00562:Inositol phosphate metabolism,hsa01100:Metabolic pathways,hsa04015:Rap1 signaling pathway,hsa04020:Calcium signaling pathway,hsa04022:cGMP-PKG signaling pathway,hsa04062:Chemokine signaling pathway,hsa04070:Phosphatidylinositol signaling system,hsa04071:Sphingolipid signaling pathway,hsa04072:Phospholipase D signaling pathway,hsa04261:Adrenergic signaling in cardiomyocytes,hsa04270:Vascu…	614669~Auriculocondylar syndrome 2,	KW-0378~Hydrolase,KW-0807~Transducer,	The protein encoded by this gene catalyzes the formation of inositol 1,4,5-trisphosphate and diacylglycerol from phosphatidylinositol 4,5-bisphosphate. This reaction uses calcium as a cofactor and plays an important role in the intracellular transduction of many extracellular signals in the retina.
PTPRR	protein tyrosine phosphatase receptor type R(PTPRR)	2.44205	0.0601551	GO:0001701~in utero embryonic development,GO:0006470~protein dephosphorylation,GO:0007165~signal transduction,GO:0010633~negative regulation of epithelial cell migration,GO:0035335~peptidyl-tyrosine dephosphorylation,GO:0038128~ERBB2 signaling pathway,GO:0070373~negative regulation of ERK1 and ERK2 cascade; localized mostly to plasma membrane, cytosol, & extracellular space	hsa04010:MAPK signaling pathway,		KW-0378~Hydrolase,KW-0675~Receptor,KW-0904~Protein phosphatase,	This gene encodes a protein tyrosine phosphatase signaling molecule that regulate a variety of cellular processes including cell growth, differentiation, mitotic cycle, and oncogenic transformation. Its highest expression is in Purkinje cells (PMID: 15582153) but it is also expressed in other brain and some nonbrain tissues. There is low, but preferential, expression in myoblasts. Associated with…
ST8SIA5	ST8 alpha-N-acetyl-neuraminide alpha-2,8-sialyltransferase 5(ST8SIA5)	4.12617	0.747988	GO:0005975~carbohydrate metabolic process,GO:0006486~protein glycosylation,GO:0006491~N-glycan processing,GO:0006688~glycosphingolipid biosynthetic process,GO:0009311~oligosaccharide metabolic process,	hsa00604:Glycosphingolipid biosynthesis - ganglio series,hsa01100:Metabolic pathways,		KW-0328~Glycosyltransferase,KW-0808~Transferase,	The protein encoded by this little-studied gene is a type II membrane protein, which may be involved in the synthesis of gangliosides. It may facilitate neuronal differentiation (PMID: 22189683).
TRIM72	tripartite motif containing 72(TRIM72)	43.1863	47.4147	GO:0001778~plasma membrane repair,GO:0003012~muscle system process,GO:0006887~exocytosis,GO:0007517~muscle organ development,GO:0010832~negative regulation of myotube differentiation,GO:0016567~protein ubiquitination,GO:0043161~proteasome-mediated ubiquitin-dependent protein catabolic process,GO:0043569~negative regulation of insulin-like growth factor receptor signaling pathway,GO:0046627~negati…				The protein encoded by this gene is involved in cell membrane repair and membrane budding. Brain injury can involve cell membrane repair (PMID: 26967557). Cell membrane repair is especially important for myoblast fusion and for brain homeostasis.
VAX2	ventral anterior homeobox 2(VAX2)	4.29021	0.350657	GO:0000122~negative regulation of transcription from RNA polymerase II promoter,GO:0006357~regulation of transcription from RNA polymerase II promoter,GO:0007398~ectoderm development,GO:0007409~axonogenesis,GO:0007417~central nervous system development,GO:0007420~brain development,GO:0007601~visual perception,GO:0009950~dorsal/ventral axis specification,GO:0016055~Wnt signaling pathway,GO:0030182…			KW-0217~Developmental protein,KW-0238~DNA-binding,KW-9996~Developmental protein,	The homeobox TF encoded by this gene is involved in retina formation and may function in dorsoventral specification of the forebrain.
ZIC1	Zic family member 1	4.99961	1.55238	GO:0006357~regulation of transcription from RNA polymerase II promoter,GO:0007389~pattern specification process,GO:0007417~central nervous system development,GO:0007420~brain development,GO:0007628~adult walking behavior,GO:0008589~regulation of smoothened signaling pathway,GO:0010467~gene expression,GO:0021510~spinal cord development,GO:0021766~hippocampus development,GO:0021772~olfactory bulb d…		616602~Craniosynostosis 6,618736~Structural brain anomalies with impaired intellectual development and craniosynostosis,	KW-0010~Activator,KW-0217~Developmental protein,KW-0238~DNA-binding,KW-9996~Developmental protein,	This cerebellum-specific homeobox gene encodes a TF that promotes mossy fiber neuron migration towards ipsilaterally-located cerebellar territories. May have a role in shear flow mechanotransduction in osteocytes. ZIC1 is involved in the development of granule cell neurons in the cerebellum (PMID: 33519389).
ZNF556	zinc finger protein 556(ZNF556)	11.95	0.335262	GO:0000122~negative regulation of transcription from RNA polymerase II promoter,GO:0006355~regulation of transcription, DNA-templated,GO:0006357~regulation of transcription from RNA polymerase II promoter; DNA sequence-specific transcription factor	hsa05168:Herpes simplex virus 1 infection,		KW-0238~DNA-binding,	This Zn finger TF has not been functionally characterized.
aGO Annotation of the 20 genes preferentially expressed in myoblasts and cerebellum from DAVID Gene Functional Classification (https://david.ncifcrf.gov/) supplemented with a few references and the corresponding PMID. Green font, muscle-associated terms; red font, neural tissue- or neurogenesis-associated terms. TF, transcription factor

## Sheet: Table S5 GO CellCult genes
Table S5. Gene ontology analyses on the sets of genes with cerebellum preferential expression as well as preferential expression in one of each of six cell culturesa
Genes	FPKM ratiob		Category	Term	Count	%	P-Value	Genes	Fold Enrichment	Bonferroni	Benjamini	FDR
Myob/Cbl genes (20 out of a total of 422 genes preferentially in myoblasts were also preferentially expressed in cerebellum; 4.7%)
ZNF556	1076.34		INTERPRO	IPR017970:Homeobox, conserved site	4	20	0.000882913	EN2, PAX3, LBX1, VAX2	19.7206	0.065753	0.0679843	0.0679843
CDH15	559.718		UP_SEQ_FEATURE	DNA_BIND:Homeobox	4	20	0.0012286	EN2, PAX3, LBX1, VAX2	17.5923	0.146652	0.15849	0.15849
LBX1	229.724		GOTERM_MF_DIRECT	GO:1990837~sequence-specific double-stranded DNA binding	5	25	0.00165124	ZIC1, EN2, PAX3, LBX1, VAX2	8.91729	0.0747326	0.0776084	0.0776084
DOK7	219.621		INTERPRO	IPR001356:Homeodomain	4	20	0.00198063	EN2, PAX3, LBX1, VAX2	14.8864	0.141578	0.0762544	0.0762544
TRIM72	126.535		UP_KW_DOMAIN	KW-0371~Homeobox	4	20	0.00296135	EN2, PAX3, LBX1, VAX2	12.762	0.0320968	0.0325749	0.0325749
FNDC5	87.5964		UP_KW_MOLECULAR_FUNCTION	KW-9996~Developmental protein	6	30	0.00345261	ZIC1, EN2, CHRD, PAX3, LBX1, VAX2	4.94419	0.0538341	0.0276209	0.0276209
EN2	56.0572		UP_KW_MOLECULAR_FUNCTION	KW-0217~Developmental protein	6	30	0.00345261	ZIC1, EN2, CHRD, PAX3, LBX1, VAX2	4.94419	0.0538341	0.0276209	0.0276209
ZIC1	38.6949		INTERPRO	IPR009057:Homeodomain-like	4	20	0.00388095	EN2, PAX3, LBX1, VAX2	11.7356	0.258748	0.0996112	0.0996112
CNPY1	38.5912		GOTERM_BP_DIRECT	GO:0007517~muscle organ development	3	15	0.0039399	TRIM72, PAX3, LBX1	30.1269	0.38465	0.484607	0.484607
PAX3	23.2333		SMART	SM00389:HOX	4	20	0.00514441	EN2, PAX3, LBX1, VAX2	10.3247	0.134472	0.144043	0.144043
PLCB4	22.2585		GOTERM_MF_DIRECT	GO:0000981~RNA polymerase II transcription factor activity, sequence-specific DNA binding	6	30	0.00577342	ZIC1, EN2, PAX3, ZNF556, LBX1, VAX2	4.65974	0.23825	0.135675	0.135675
ANK1	15.3319		GOTERM_BP_DIRECT	GO:0006357~regulation of transcription from RNA polymerase II promoter	6	30	0.017946	ZIC1, EN2, PAX3, ZNF556, LBX1, VAX2	3.54026	0.892192	1	1
MPP4	8.90198		UP_KW_BIOLOGICAL_PROCESS	KW-0524~Neurogenesis	3	15	0.0207123	ZIC1, PAX3, LBX1	11.7683	0.238213	0.257698	0.257698
CHRD	6.9949		UP_SEQ_FEATURE	DOMAIN:PH	3	15	0.0277951	PLCB4, MCF2L, DOK7	10.8713	0.973651	1	1
PTPRR	6.26238		GOTERM_BP_DIRECT	GO:0007389~pattern specification process	2	10	0.0336876	ZIC1, CHRD	55.3684	0.985227	1	1
KCNJ12	6.11387		UP_KW_BIOLOGICAL_PROCESS	KW-0517~Myogenesis	2	10	0.0396458	PAX3, LBX1	44.6118	0.408971	0.257698	0.257698
IL11	5.90026		UP_KW_PTM	KW-0702~S-nitrosylation	2	10	0.042147	TRIM72, KCNJ12	42.3279	0.291416	0.379323	0.379323
VAX2	5.86399		INTERPRO	IPR000047:Helix-turn-helix motif	2	10	0.04283	LBX1, VAX2	43.475	0.965632	0.824477	0.824477
ST8SIA5	5.49998		UP_KW_MOLECULAR_FUNCTION	KW-0238~DNA-binding	6	30	0.0637493	ZIC1, EN2, PAX3, ZNF556, LBX1, VAX2	2.42265	0.651443	0.339996	0.339996
MCF2L	5.36185		GOTERM_CC_DIRECT	GO:0000785~chromatin	4	20	0.07956	EN2, PAX3, LBX1, VAX2	3.70916	0.97395	1	1
			INTERPRO	IPR020479:Homeodomain, metazoa	2	10	0.0884801	EN2, VAX2	20.5688	0.999202	1	1
			GOTERM_CC_DIRECT	GO:0042383~sarcolemma	2	10	0.0964974	TRIM72, ANK1	18.7818	0.988495	1	1
LCL (GM12878)/Cbl genes (16 out of a total of 803 genes preferentially expressed in the LCL were also preferentially expressed in Cbl; 2.0%)
IL16	222.459		INTERPRO	IPR026061:Stereocilin	2	12.5	0.00125428	STRC, STRCP1	1471.46	0.0549127	0.0564425	0.0564425
COL19A1	196.932		INTERPRO	IPR026664:Stereocilin related	2	12.5	0.00313299	STRC, STRCP1	588.585	0.13169	0.0704923	0.0704923
PCP2	189.898		GOTERM_CC_DIRECT	GO:0060091~kinocilium	2	12.5	0.00564998	STRC, STRCP1	327.937	0.220657	0.248599	0.248599
SHISA8	40.676		UP_SEQ_FEATURE	COMPBIAS:Pro residues	6	37.5	0.0131166	C1ORF127, IL16, NRG2, SHISA8, CBFA2T3, COL19A1	3.71982	0.746692	1	1
TP73	28.63		GOTERM_CC_DIRECT	GO:0032426~stereocilium tip	2	12.5	0.0131374	STRC, STRCP1	140.544	0.441152	0.289024	0.289024
NRG2	26.4689		UP_SEQ_FEATURE	REGION:Disordered	15	93.75	0.0204519	GRAMD1B, IL16, NRG2, SHISA8, CBFA2T3, COL19A1, CCDC88B, PCP2, C1ORF127, RAB37, STRC, CAMK4, SFI1, TP73, TUBA8	1.40013	0.883405	1	1
CAMK4	23.1524		KEGG_PATHWAY	hsa04722:Neurotrophin signaling pathway	2	12.5	0.0674196	CAMK4, TP73	24.0504	0.900081	1	1
TUBA8	18.099		GOTERM_BP_DIRECT	GO:0007160~cell-matrix adhesion	2	12.5	0.0704324	STRC, STRCP1	25.5072	0.997099	1	1
CCDC88B	16.4999		UP_SEQ_FEATURE	COMPBIAS:Polar residues	9	56.25	0.0933381	CCDC88B, PCP2, GRAMD1B, C1ORF127, IL16, NRG2, SFI1, CBFA2T3, TP73	1.66901	0.999962	1	1
C1orf127	16.2742
CBFA2T3	15.3604
RAB37	13.4841
STRCP1	11.4682
SFI1	9.25971
GRAMD1B	5.35038
STRC	5.19295
ESC/Cbl genes (68 out of a total of 1148 genes preferentially expressed in ESC were also preferentially expressed in cerebellum; 5.9%)
ZIC3	20699.9		GOTERM_CC_DIRECT	GO:0045202~synapse	13	19.697	1.13545e-07	GRID2, CHRNA3, CACNA1A, SLC1A6, SLC8A2, CACNA1G, CALB1, PTCHD1, CHN2, VWC2, GABRD, PVALB, CBLN1	7.46678	1.45337e-05	1.45338e-05	1.32848e-05
OTX2	11052.7		UP_KW_CELLULAR_COMPONENT	KW-1003~Cell membrane	32	48.4848	4.05402e-07	CHRNA3, TMEM63C, MEGF11, KCNC3, CACNA1A, GRIK2, SLC1A6, CELSR3, SLC5A5, SLC8A2, CACNA1G, NKAIN1, MMP24, GRM4, PTCHD1, CA4, CDH23, PCDHA2, GABRD, RHBG, GRID2, PRRT2, ABCC8, PCDHGC4, ADAM11, PCDHA12, STXBP5L, XKR7, CLDN9, CLEC4G, GRID2IP, CBLN1	2.38343	6.08102e-06	5.85983e-06	5.85983e-06
ZIC5	4349.78		UP_SEQ_FEATURE	CARBOHYD:N-linked (GlcNAc...) asparagine	33	50	6.64747e-07	CPNE9, CHRNA3, WFIKKN1, NXPH3, MEGF11, KCNC3, CACNA1A, GRIK2, SLC1A6, CELSR3, SLC5A5, SLC8A2, CACNA1G, ADAMTS16, NKAIN1, TMEM145, GRM4, PTCHD1, IGLON5, CDH23, PCDHA2, GABRD, RHBG, GALNT9, GRID2, SYT2, WSCD2, ABCC8, PCDHGC4, ADAM11, PCDHA12, CLEC4G, CBLN1	2.32998	0.000267193	0.000267228	0.000263904
ZIC2	2176.51		UP_KW_CELLULAR_COMPONENT	KW-0628~Postsynaptic cell membrane	8	12.1212	9.46967e-07	CHRNA3, GRID2, PRRT2, KCNC3, GRIK2, GABRD, CBLN1, GRID2IP	14.8592	1.42044e-05	5.85983e-06	5.85983e-06
GRID2	883.467		UP_KW_CELLULAR_COMPONENT	KW-0770~Synapse	12	18.1818	1.17197e-06	CHRNA3, GRID2, SYT2, PRRT2, KCNC3, ADAM11, VWC2, GRIK2, GABRD, CBLN1, GRID2IP, SLC8A2	6.69081	1.75794e-05	5.85983e-06	5.85983e-06
PTCHD1	570.957		GOTERM_BP_DIRECT	GO:0007268~chemical synaptic transmission	9	13.6364	1.17242e-06	CHRNA3, GRM4, PTCHD1, CACNA1A, GRIK2, SLC1A6, GABRD, CACNA1G, CBLN1	11.1729	0.000452453	0.000452555	0.000446693
XKR7	478.246		UP_KW_PTM	KW-0325~Glycoprotein	35	53.0303	1.45849e-06	CPNE9, CHRNA3, WFIKKN1, NXPH3, MEGF11, KCNC3, CACNA1A, GRIK2, SLC1A6, CELSR3, SLC5A5, SLC8A2, CACNA1G, ADAMTS16, NKAIN1, TMEM145, GRM4, PTCHD1, IGLON5, CA4, CDH23, PCDHA2, GABRD, RHBG, GALNT9, CHGB, GRID2, SYT2, WSCD2, ABCC8, PCDHGC4, ADAM11, PCDHA12, CLEC4G, CBLN1	1.99924	1.89602e-05	2.04188e-05	2.04188e-05
ABCC8	420.743		UP_SEQ_FEATURE	TOPO_DOM:Cytoplasmic	28	42.4242	1.96952e-05	CHRNA3, MEGF11, KCNC3, CACNA1A, GRIK2, SLC1A6, CELSR3, SLC5A5, SLC8A2, CACNA1G, NKAIN1, MMP24, GRM4, CDH23, PCDHA2, GABRD, RHBG, GALNT9, GRID2, SYT2, PRRT2, WSCD2, ABCC8, PCDHGC4, ADAM11, PCDHA12, CLDN9, CLEC4G	2.24998	0.00788628	0.00280409	0.00276921
INSM1	419.031		UP_SEQ_FEATURE	TOPO_DOM:Extracellular	24	36.3636	2.0926e-05	GRID2, CHRNA3, PRRT2, WSCD2, MEGF11, ABCC8, PCDHGC4, ADAM11, CACNA1A, GRIK2, PCDHA12, CELSR3, SLC5A5, SLC8A2, CACNA1G, NKAIN1, GRM4, MMP24, CLDN9, CDH23, PCDHA2, GABRD, RHBG, CLEC4G	2.51587	0.00837708	0.00280409	0.00276921
WSCD2	309.945		GOTERM_CC_DIRECT	GO:0045211~postsynaptic membrane	7	10.6061	4.38011e-05	CHRNA3, GRID2, KCNC3, GRIK2, GABRD, CBLN1, GRID2IP	10.7412	0.00559097	0.00280327	0.00256236
CBLN1	226.51		GOTERM_CC_DIRECT	GO:0005886~plasma membrane	33	50	6.85704e-05	CPNE9, CHRNA3, TMEM63C, KCNC3, CACNA1A, GRIK2, SLC1A6, CELSR3, SLC5A5, SLC8A2, CACNA1G, NKAIN1, MMP24, GRM4, PTCHD1, CA4, CDH23, INPP5J, PCDHA2, GABRD, RHBG, GRID2, SYT2, PRRT2, ABCC8, PCDHGC4, ADAM11, PCDHA12, SPTB, STXBP5L, XKR7, CLDN9, CLEC4G	1.89263	0.0087389	0.00292567	0.00267425
RBFOX3	226.083		UP_KW_BIOLOGICAL_PROCESS	KW-0406~Ion transport	10	15.1515	7.6276e-05	CHRNA3, GRID2, TMEM63C, KCNC3, CACNA1A, GRIK2, GABRD, SLC5A5, CACNA1G, SLC8A2	5.07721	0.00190515	0.0019069	0.0019069
STXBP5L	207.497		UP_KW_MOLECULAR_FUNCTION	KW-0407~Ion channel	8	12.1212	8.2523e-05	CHRNA3, GRID2, TMEM63C, KCNC3, CACNA1A, GRIK2, GABRD, CACNA1G	7.16848	0.00296654	0.00297083	0.00297083
SBK1	173.341		UP_KW_LIGAND	KW-0106~Calcium	15	22.7273	9.77046e-05	CPNE9, SYT2, TMEM63C, PCDHGC4, CACNA1A, PCDHA12, CELSR3, SLC8A2, CACNA1G, ADAMTS16, MMP24, CALB1, CDH23, PCDHA2, PVALB	3.04321	0.00117183	0.00117246	0.00117246
GRM4	152.797		UP_SEQ_FEATURE	DOMAIN:Cadherin 6	5	7.57576	0.000131669	PCDHGC4, CDH23, PCDHA2, PCDHA12, CELSR3	19.0161	0.0515579	0.0132328	0.0130682
CLEC4G	121.866		UP_SEQ_FEATURE	TRANSMEM:Helical	32	48.4848	0.000224694	CHRNA3, TMEM151B, TMEM63C, MEGF11, KCNC3, CACNA1A, GRIK2, SLC1A6, SLC5A5, SLC8A2, CACNA1G, NKAIN1, TMEM145, MMP24, GRM4, PTCHD1, CA4, CDH23, PCDHA2, GABRD, RHBG, GALNT9, GRID2, SYT2, PRRT2, ABCC8, PCDHGC4, ADAM11, PCDHA12, XKR7, CLDN9, CLEC4G	1.81778	0.0863771	0.0170225	0.0168107
CHRNA3	118.183		UP_SEQ_FEATURE	ZN_FING:C2H2-type 1; atypical	4	6.06061	0.000273183	ZIC2, ZIC3, ZIC5, INSM1	31.1864	0.104018	0.0170225	0.0168107
CALB1	110.678		GOTERM_BP_DIRECT	GO:0007399~nervous system development	8	12.1212	0.000320971	CHRNA3, SRRM4, RBFOX3, SPRY3, PCDHA2, PCDHA12, MYT1, CBLN1	6.00563	0.116545	0.0532628	0.0525729
NKAIN1	106.666		UP_SEQ_FEATURE	DOMAIN:Cadherin 5	5	7.57576	0.000328625	PCDHGC4, CDH23, PCDHA2, PCDHA12, CELSR3	14.9934	0.123772	0.0170225	0.0168107
IGLON5	103.014		GOTERM_BP_DIRECT	GO:0099566~regulation of postsynaptic cytosolic calcium ion concentration	3	4.54545	0.00041396	CALB1, GRID2IP, SLC8A2	95.7148	0.147704	0.0532628	0.0525729
CPNE9	101.871		UP_SEQ_FEATURE	DOMAIN:Cadherin 4	5	7.57576	0.00042102	PCDHGC4, CDH23, PCDHA2, PCDHA12, CELSR3	14.0479	0.155732	0.0170225	0.0168107
CACNA1G	98.5984		UP_SEQ_FEATURE	DOMAIN:Cadherin 3	5	7.57576	0.00042102	PCDHGC4, CDH23, PCDHA2, PCDHA12, CELSR3	14.0479	0.155732	0.0170225	0.0168107
PCDHA12	97.283		UP_SEQ_FEATURE	DOMAIN:Cadherin 1	5	7.57576	0.000465788	PCDHGC4, CDH23, PCDHA2, PCDHA12, CELSR3	13.6782	0.170797	0.0170225	0.0168107
CECR2	94.7554		UP_SEQ_FEATURE	DOMAIN:Cadherin 2	5	7.57576	0.000465788	PCDHGC4, CDH23, PCDHA2, PCDHA12, CELSR3	13.6782	0.170797	0.0170225	0.0168107
GABRD	84.7918		GOTERM_CC_DIRECT	GO:0016021~integral component of membrane	31	46.9697	0.000528166	CHRNA3, TMEM151B, TMEM63C, MEGF11, KCNC3, CACNA1A, GRIK2, SLC1A6, CELSR3, SLC5A5, SLC8A2, NKAIN1, TMEM145, GRM4, PTCHD1, CA4, CDH23, GABRD, RHBG, GALNT9, GRID2, SYT2, PRRT2, WSCD2, ABCC8, PCDHGC4, ADAM11, PCDHA12, XKR7, CLDN9, CLEC4G	1.76821	0.0653874	0.0169013	0.0154489
SLC8A2	81.7393		INTERPRO	IPR020894:Cadherin conserved site	5	7.57576	0.000558294	PCDHGC4, CDH23, PCDHA2, PCDHA12, CELSR3	13.0218	0.0966435	0.0438057	0.043565
SRRM4	63.845		UP_SEQ_FEATURE	COMPBIAS:Pro residues	17	25.7576	0.000574926	CPNE9, CHRNA3, PRRT2, RBFOX3, KCNC3, CACNA1A, ZIC5, CELSR3, ADAMTS16, CECR2, TMEM145, MMP24, CDH23, INPP5J, ZNF385C, INSM1, GRID2IP	2.55503	0.206409	0.01926	0.0190205
SYT2	58.2053		INTERPRO	IPR002126:Cadherin	5	7.57576	0.00065714	PCDHGC4, CDH23, PCDHA2, PCDHA12, CELSR3	12.47	0.112759	0.0438057	0.043565
PVALB	56.3794		INTERPRO	IPR015919:Cadherin-like	5	7.57576	0.000722072	PCDHGC4, CDH23, PCDHA2, PCDHA12, CELSR3	12.1608	0.12319	0.0438057	0.043565
VWC2	55.9265		GOTERM_CC_DIRECT	GO:0042734~presynaptic membrane	5	7.57576	0.000774957	PRRT2, KCNC3, ADAM11, GRIK2, SLC1A6	11.9477	0.0944683	0.0198389	0.018134
CA4	36.2788		UP_SEQ_FEATURE	REGION:Disordered	56	84.8485	0.0010917	CPNE9, TMEM151B, WFIKKN1, MEGF11, KCNC3, CELSR3, SLC8A2, TMEM145, MMP24, GRM4, ZIC2, ZIC3, ZNF385C, CA8, GALNT9, CHGB, SRRM3, SRRM4, GRID2, RBFOX3, ABCC8, ADAM11, PCDHA12, MYT1, SPTB, CLDN9, CLEC4G, GRID2IP, CHRNA3, ZBTB46, TMEM63C, NXPH3, CACNA1A, SLC1A6, SLC5A5, CACNA1G, ADAMTS16, CECR2, CHN2, CDH23, INPP5J, OTX2, PCDHA2, GABRD, RHBG, SYT2, PRRT2, PCDHGC4, ZIC5, STXBP5L, XKR7, SBK1, VWC2, LHX5,…	1.26719	0.355384	0.0337586	0.0333387
CA8	35.9351		GOTERM_CC_DIRECT	GO:0030424~axon	7	10.6061	0.00110511	SYT2, CALB1, KCNC3, ADAM11, GABRD, PVALB, SLC8A2	5.89036	0.131973	0.0235758	0.0215497
WFIKKN1	35.8523		GOTERM_MF_DIRECT	GO:0008066~glutamate receptor activity	3	4.54545	0.00136127	GRID2, GRM4, GRIK2	53.6045	0.175874	0.142828	0.141822
MYT1	32.2369		UP_KW_BIOLOGICAL_PROCESS	KW-0524~Neurogenesis	6	9.09091	0.0013741	ZIC2, ZIC3, SPRY3, ZIC5, INSM1, MYT1	6.92252	0.033792	0.0171762	0.0171762
SLC1A6	29.4742		SMART	SM00112:CA	5	7.57576	0.00155737	PCDHGC4, CDH23, PCDHA2, PCDHA12, CELSR3	9.71327	0.0764107	0.0794259	0.0794259
ADAMTS16	24.6022		GOTERM_CC_DIRECT	GO:0005887~integral component of plasma membrane	13	19.697	0.00174787	GRID2, CHRNA3, PCDHGC4, GRIK2, PCDHA12, SLC1A6, SLC8A2, GRM4, MMP24, PCDHA2, GABRD, RHBG, CLEC4G	2.79683	0.200623	0.0312372	0.0285528
ZNF385C	23.8303		GOTERM_CC_DIRECT	GO:0098688~parallel fiber to Purkinje cell synapse	3	4.54545	0.0019693	GRID2, CBLN1, GRID2IP	44.7186	0.223003	0.0312372	0.0285528
CELSR3	21.8338		UP_SEQ_FEATURE	DOMAIN:Receptor ligand binding region	3	4.54545	0.00198378	GRID2, GRM4, GRIK2	44.5519	0.549894	0.0569628	0.0562543
CDH23	18.5495		GOTERM_MF_DIRECT	GO:0005509~calcium ion binding	9	13.6364	0.00201166	SYT2, CALB1, PCDHGC4, CDH23, CACNA1A, PCDHA2, PCDHA12, PVALB, CELSR3	3.82889	0.248695	0.142828	0.141822
PCDHA2	15.7562		GOTERM_BP_DIRECT	GO:0007156~homophilic cell adhesion via plasma membrane adhesion molecules	5	7.57576	0.00203816	PCDHGC4, CDH23, PCDHA2, PCDHA12, CELSR3	9.16808	0.545034	0.196683	0.194135
TMEM151B	15.6859		GOTERM_CC_DIRECT	GO:0098978~glutamatergic synapse	7	10.6061	0.00219637	GRID2, CALB1, PRRT2, GRIK2, SLC1A6, SPTB, CBLN1	5.14369	0.245307	0.0312372	0.0285528
GRID2IP	15.4733		UP_KW_DOMAIN	KW-0677~Repeat	32	48.4848	0.00240723	CPNE9, WFIKKN1, ZBTB46, MEGF11, CACNA1A, CELSR3, SLC8A2, CACNA1G, ADAMTS16, MMP24, CALB1, ZIC2, ZIC3, IGLON5, CDH23, ZNF385C, INPP5J, PCDHA2, SYT2, WSCD2, ABCC8, PCDHGC4, ZIC5, PCDHA12, MYT1, SPTB, STXBP5L, VWC2, LHX5, INSM1, PVALB, GRID2IP	1.5682	0.037828	0.0385156	0.0337012
CHGB	14.8122		KEGG_PATHWAY	hsa04724:Glutamatergic synapse	4	6.06061	0.002611	GRM4, CACNA1A, GRIK2, SLC1A6	13.5747	0.124828	0.133161	0.133161
KCNC3	13.4557		GOTERM_BP_DIRECT	GO:0042391~regulation of membrane potential	4	6.06061	0.00374654	CHRNA3, SLC1A6, GABRD, CACNA1G	12.6356	0.765167	0.263976	0.260556
TMEM145	12.2812		GOTERM_BP_DIRECT	GO:0090102~cochlea development	3	4.54545	0.00410325	CECR2, CALB1, PVALB	30.8757	0.795485	0.263976	0.260556
GRIK2	12.1621		UP_KW_BIOLOGICAL_PROCESS	KW-0813~Transport	14	21.2121	0.00444143	GRID2, CHRNA3, TMEM63C, ABCC8, KCNC3, CACNA1A, GRIK2, SLC1A6, SLC5A5, STXBP5L, SLC8A2, CACNA1G, GABRD, RHBG	2.20435	0.105315	0.0370119	0.0370119
LHX5	11.7284		GOTERM_MF_DIRECT	GO:0015276~ligand-gated ion channel activity	3	4.54545	0.0045616	CHRNA3, GRID2, GRIK2	29.2388	0.477551	0.215916	0.214395
SPTB	11.0455		GOTERM_CC_DIRECT	GO:0032420~stereocilium	3	4.54545	0.00542383	CALB1, CDH23, PVALB	26.8312	0.501494	0.069425	0.0634588
SLC5A5	10.9939		KEGG_PATHWAY	hsa04930:Type II diabetes mellitus	3	4.54545	0.00552714	ABCC8, CACNA1A, CACNA1G	25.4526	0.246228	0.140942	0.140942
ADAM11	10.9224		GOTERM_BP_DIRECT	GO:0098703~calcium ion import across plasma membrane	3	4.54545	0.00611822	CACNA1A, CACNA1G, SLC8A2	25.1881	0.906415	0.330769	0.326484
SLC22A20	10.2364		GOTERM_MF_DIRECT	GO:1904315~transmitter-gated ion channel activity involved in regulation of postsynaptic membrane potential	3	4.54545	0.00664711	GRID2, GRIK2, GABRD	24.122	0.612113	0.235972	0.234311
PRRT2	9.6023		UP_KW_BIOLOGICAL_PROCESS	KW-0221~Differentiation	8	12.1212	0.00691083	CPNE9, SRRM4, SYT2, ZIC2, ZIC3, ZIC5, INSM1, MYT1	3.35848	0.159174	0.0431927	0.0431927
SRRM3	9.49241		GOTERM_CC_DIRECT	GO:0043025~neuronal cell body	6	9.09091	0.00709269	CHRNA3, CALB1, CACNA1A, GABRD, PVALB, SLC8A2	4.90387	0.597918	0.0825331	0.0754404
CACNA1A	8.73569		INTERPRO	IPR001828:Extracellular ligand-binding receptor	3	4.54545	0.00716852	GRID2, GRM4, GRIK2	23.2336	0.73001	0.326168	0.324376
INPP5J	8.6092		UP_KW_DOMAIN	KW-1133~Transmembrane helix	34	51.5152	0.00800976	CHRNA3, TMEM151B, TMEM63C, MEGF11, KCNC3, CACNA1A, GRIK2, SLC1A6, CELSR3, SLC5A5, SLC8A2, CACNA1G, NKAIN1, TMEM145, MMP24, GRM4, PTCHD1, CA4, CDH23, PCDHA2, GABRD, RHBG, GALNT9, GRID2, SYT2, PRRT2, WSCD2, ABCC8, PCDHGC4, ADAM11, PCDHA12, XKR7, CLDN9, CLEC4G	1.42669	0.120738	0.0500619	0.0438042
PCDHGC4	8.46128		GOTERM_BP_DIRECT	GO:0051480~regulation of cytosolic calcium ion concentration	3	4.54545	0.00813618	CALB1, CDH23, SLC8A2	21.7534	0.957294	0.330769	0.326484
NXPH3	6.90693		UP_KW_CELLULAR_COMPONENT	KW-0472~Membrane	38	57.5758	0.00891323	CHRNA3, TMEM151B, TMEM63C, MEGF11, KCNC3, CACNA1A, GRIK2, SLC1A6, CELSR3, SLC5A5, SLC8A2, CACNA1G, NKAIN1, TMEM145, MMP24, GRM4, PTCHD1, CHN2, CA4, CDH23, PCDHA2, GABRD, RHBG, GALNT9, GRID2, SYT2, PRRT2, WSCD2, ABCC8, PCDHGC4, ADAM11, PCDHA12, STXBP5L, XKR7, CLDN9, CLEC4G, GRID2IP, CBLN1	1.36158	0.12567	0.0334246	0.0334246
MEGF11	6.68419		GOTERM_BP_DIRECT	GO:0034220~ion transmembrane transport	4	6.06061	0.009067	CHRNA3, GRID2, GRIK2, GABRD	9.18127	0.970277	0.330769	0.326484
CHN2	6.48461		GOTERM_BP_DIRECT	GO:0098977~inhibitory chemical synaptic transmission	2	3.0303	0.00922078	PTCHD1, PVALB	212.699	0.972005	0.330769	0.326484
TMEM63C	6.22214		UP_KW_DOMAIN	KW-0812~Transmembrane	34	51.5152	0.00938661	CHRNA3, TMEM151B, TMEM63C, MEGF11, KCNC3, CACNA1A, GRIK2, SLC1A6, CELSR3, SLC5A5, SLC8A2, CACNA1G, NKAIN1, TMEM145, MMP24, GRM4, PTCHD1, CA4, CDH23, PCDHA2, GABRD, RHBG, GALNT9, GRID2, SYT2, PRRT2, WSCD2, ABCC8, PCDHGC4, ADAM11, PCDHA12, XKR7, CLDN9, CLEC4G	1.41373	0.140062	0.0500619	0.0438042
CCNJL	6.12901		GOTERM_BP_DIRECT	GO:0006811~ion transport	4	6.06061	0.00942606	CHRNA3, SLC1A6, SLC5A5, SLC8A2	9.05104	0.974157	0.330769	0.326484
MMP24	6.0497		KEGG_PATHWAY	hsa04080:Neuroactive ligand-receptor interaction	5	7.57576	0.0110289	CHRNA3, GRID2, GRM4, GRIK2, GABRD	5.31707	0.43198	0.187492	0.187492
GALNT9	5.91072		GOTERM_CC_DIRECT	GO:0043204~perikaryon	4	6.06061	0.0147349	KCNC3, ADAM11, GRIK2, SLC8A2	7.68173	0.850447	0.149858	0.13698
ZBTB46	5.58264		GOTERM_CC_DIRECT	GO:0043197~dendritic spine	4	6.06061	0.01522	GRID2, CALB1, PRRT2, SLC8A2	7.58861	0.859583	0.149858	0.13698
SPRY3	5.19515		GOTERM_BP_DIRECT	GO:0050808~synapse organization	3	4.54545	0.0152213	PCDHGC4, CBLN1, SLC8A2	15.6909	0.997316	0.48962	0.483278
CLDN9	5.17835		GOTERM_MF_DIRECT	GO:0019905~syntaxin binding	3	4.54545	0.0159137	SYT2, CACNA1A, STXBP5L	15.3156	0.897502	0.447167	0.444018
CNTD2	5.08194		UP_KW_DISEASE	KW-0950~Spinocerebellar ataxia	3	4.54545	0.0181333	KCNC3, CACNA1A, CACNA1G	13.7043	0.319069	0.380799	0.380799
RHBG	5.03501		GOTERM_CC_DIRECT	GO:0043679~axon terminus	3	4.54545	0.01837	PRRT2, KCNC3, SLC8A2	14.2287	0.90682	0.167954	0.15352
			GOTERM_MF_DIRECT	GO:0097110~scaffold protein binding	3	4.54545	0.0188944	GRID2, GRIK2, CACNA1G	13.9838	0.933375	0.447167	0.444018
			INTERPRO	IPR027359:Voltage-dependent potassium channel, four helix bundle domain	3	4.54545	0.0194454	KCNC3, CACNA1A, CACNA1G	13.795	0.971954	0.607272	0.603936
			INTERPRO	IPR013164:Cadherin, N-terminal	3	4.54545	0.02002	PCDHGC4, PCDHA2, PCDHA12	13.5827	0.974792	0.607272	0.603936
			GOTERM_BP_DIRECT	GO:0060079~excitatory postsynaptic potential	3	4.54545	0.0202679	CHRNA3, GRID2, GRIK2	13.481	0.999631	0.554098	0.546921
			UP_SEQ_FEATURE	REGION:5 X 4 AA repeats of P-X-X-P	2	3.0303	0.0219005	PCDHA2, PCDHA12	89.1039	0.999864	0.495101	0.488943
			UP_KW_MOLECULAR_FUNCTION	KW-1071~Ligand-gated ion channel	3	4.54545	0.0236554	CHRNA3, GRID2, GRIK2	12.213	0.57761	0.425797	0.425797
			GOTERM_BP_DIRECT	GO:0030154~cell differentiation	7	10.6061	0.0238468	CPNE9, SRRM4, SYT2, ZIC2, ZIC3, ZIC5, MYT1	3.08047	0.99991	0.554098	0.546921
			GOTERM_BP_DIRECT	GO:0098815~modulation of excitatory postsynaptic potential	2	3.0303	0.0244033	GRIK2, SLC8A2	79.7623	0.999928	0.554098	0.546921
			GOTERM_BP_DIRECT	GO:1900454~positive regulation of long term synaptic depression	2	3.0303	0.0244033	GRID2, CBLN1	79.7623	0.999928	0.554098	0.546921
			GOTERM_BP_DIRECT	GO:0021707~cerebellar granule cell differentiation	2	3.0303	0.0244033	GRID2, CBLN1	79.7623	0.999928	0.554098	0.546921
			GOTERM_CC_DIRECT	GO:0014731~spectrin-associated cytoskeleton	2	3.0303	0.0248982	SPTB, RHBG	78.2576	0.960336	0.212464	0.194206
			UP_KW_DOMAIN	KW-0732~Signal	26	39.3939	0.026324	CHRNA3, WFIKKN1, NXPH3, MEGF11, CACNA1A, GRIK2, CELSR3, SLC8A2, ADAMTS16, NKAIN1, TMEM145, MMP24, GRM4, IGLON5, CA4, CDH23, PCDHA2, GABRD, RHBG, CHGB, GRID2, PCDHGC4, ADAM11, PCDHA12, VWC2, CBLN1	1.45368	0.347424	0.105296	0.0921341
			UP_SEQ_FEATURE	DOMAIN:Cadherin	3	4.54545	0.0277343	PCDHGC4, CDH23, PCDHA12	11.4096	0.999988	0.495101	0.488943
			GOTERM_CC_DIRECT	GO:0032437~cuticular plate	2	3.0303	0.0279672	CALB1, PVALB	69.5623	0.973505	0.223738	0.20451
			GOTERM_BP_DIRECT	GO:0050804~modulation of synaptic transmission	3	4.54545	0.0289484	GRID2, CACNA1A, GRIK2	11.1296	0.999988	0.600774	0.592992
			GOTERM_BP_DIRECT	GO:0007626~locomotory behavior	3	4.54545	0.0295718	CHRNA3, CALB1, CDH23	11.0017	0.999991	0.600774	0.592992
			INTERPRO	IPR002077:Voltage-dependent calcium channel, alpha-1 subunit	2	3.0303	0.0297176	CACNA1A, CACNA1G	65.3983	0.995875	0.7331	0.729072
			GOTERM_BP_DIRECT	GO:0006816~calcium ion transport	3	4.54545	0.0321183	CDH23, CACNA1A, SLC8A2	10.5181	0.999997	0.613974	0.606021
			INTERPRO	IPR024079:Metallopeptidase, catalytic domain	3	4.54545	0.0322242	ADAMTS16, MMP24, ADAM11	10.5104	0.997424	0.7331	0.729072
			GOTERM_BP_DIRECT	GO:0090009~primitive streak formation	2	3.0303	0.0334027	ZIC3, OTX2	58.0089	0.999998	0.613974	0.606021
			UP_KW_BIOLOGICAL_PROCESS	KW-0109~Calcium transport	3	4.54545	0.0344714	CACNA1A, CACNA1G, SLC8A2	9.93826	0.583966	0.172357	0.172357
			GOTERM_CC_DIRECT	GO:0098839~postsynaptic density membrane	3	4.54545	0.0367787	GRID2, PRRT2, GRIK2	9.7822	0.991741	0.276922	0.253124
			UP_SEQ_FEATURE	REPEAT:PXXP 5	2	3.0303	0.0372538	PCDHA2, PCDHA12	51.9773	1	0.495101	0.488943
			UP_SEQ_FEATURE	DOMAIN:Cadherin 9	2	3.0303	0.0372538	CDH23, CELSR3	51.9773	1	0.495101	0.488943
			UP_SEQ_FEATURE	DOMAIN:Cadherin 8	2	3.0303	0.0372538	CDH23, CELSR3	51.9773	1	0.495101	0.488943
			GOTERM_BP_DIRECT	GO:0098976~excitatory chemical synaptic transmission	2	3.0303	0.039357	PTCHD1, PVALB	49.0845	1	0.660513	0.651957
			GOTERM_BP_DIRECT	GO:0007614~short-term memory	2	3.0303	0.039357	CALB1, PTCHD1	49.0845	1	0.660513	0.651957
			INTERPRO	IPR018338:Carbonic anhydrase, alpha-class, conserved site	2	3.0303	0.039429	CA4, CA8	49.0487	0.999339	0.748848	0.744734
			KEGG_PATHWAY	hsa00910:Nitrogen metabolism	2	3.0303	0.0408129	CA4, CA8	45.9144	0.880582	0.479885	0.479885
			GOTERM_BP_DIRECT	GO:0048172~regulation of short-term neuronal synaptic plasticity	2	3.0303	0.0452751	GRIK2, SLC8A2	42.5399	1	0.728175	0.718743
			GOTERM_MF_DIRECT	GO:0004222~metalloendopeptidase activity	3	4.54545	0.0460708	ADAMTS16, MMP24, ADAM11	8.61501	0.998766	0.800405	0.794769
			UP_SEQ_FEATURE	REPEAT:PXXP 4	2	3.0303	0.0463517	PCDHA2, PCDHA12	41.5818	1	0.495101	0.488943
			UP_SEQ_FEATURE	REPEAT:PXXP 3	2	3.0303	0.0463517	PCDHA2, PCDHA12	41.5818	1	0.495101	0.488943
			UP_SEQ_FEATURE	REPEAT:PXXP 2	2	3.0303	0.0463517	PCDHA2, PCDHA12	41.5818	1	0.495101	0.488943
			UP_SEQ_FEATURE	REPEAT:PXXP 1	2	3.0303	0.0463517	PCDHA2, PCDHA12	41.5818	1	0.495101	0.488943
			KEGG_PATHWAY	hsa05017:Spinocerebellar ataxia	3	4.54545	0.0470476	KCNC3, CACNA1A, SLC1A6	8.18754	0.914369	0.479885	0.479885
			GOTERM_MF_DIRECT	GO:0004089~carbonate dehydratase activity	2	3.0303	0.0507299	CA4, CA8	37.8385	0.999384	0.800405	0.794769
			GOTERM_MF_DIRECT	GO:0004970~ionotropic glutamate receptor activity	2	3.0303	0.0507299	GRID2, GRIK2	37.8385	0.999384	0.800405	0.794769
			INTERPRO	IPR005821:Ion transport domain	3	4.54545	0.0507678	KCNC3, CACNA1A, CACNA1G	8.17479	0.999924	0.748848	0.744734
			INTERPRO	IPR023561:Carbonic anhydrase, alpha-class	2	3.0303	0.0522288	CA4, CA8	36.7865	0.999942	0.748848	0.744734
			UP_SEQ_FEATURE	DOMAIN:Alpha-carbonic anhydrase	2	3.0303	0.0523698	CA4, CA8	36.6898	1	0.495101	0.488943
			UP_SEQ_FEATURE	DOMAIN:Ionotropic glutamate receptor C-terminal	2	3.0303	0.0523698	GRID2, GRIK2	36.6898	1	0.495101	0.488943
			UP_KW_BIOLOGICAL_PROCESS	KW-0130~Cell adhesion	5	7.57576	0.0528394	MMP24, PCDHGC4, CDH23, PCDHA2, PCDHA12	3.39339	0.742611	0.220164	0.220164
			GOTERM_BP_DIRECT	GO:0070588~calcium ion transmembrane transport	3	4.54545	0.0529309	CACNA1A, CACNA1G, SLC8A2	7.97623	1	0.817253	0.806667
			UP_SEQ_FEATURE	DOMAIN:Cadherin 7	2	3.0303	0.0553649	CDH23, CELSR3	34.6515	1	0.495101	0.488943
			UP_SEQ_FEATURE	TRANSMEM:Helical; Name=S4 of repeat IV	2	3.0303	0.0553649	CACNA1A, CACNA1G	34.6515	1	0.495101	0.488943
			UP_SEQ_FEATURE	TRANSMEM:Helical; Name=S4 of repeat III	2	3.0303	0.0553649	CACNA1A, CACNA1G	34.6515	1	0.495101	0.488943
			UP_SEQ_FEATURE	DOMAIN:Ionotropic glutamate receptor L-glutamate and glycine-binding	2	3.0303	0.0553649	GRID2, GRIK2	34.6515	1	0.495101	0.488943
			GOTERM_MF_DIRECT	GO:0030506~ankyrin binding	2	3.0303	0.0565293	SPTB, RHBG	33.8555	0.999742	0.802716	0.797063
			GOTERM_BP_DIRECT	GO:0007215~glutamate receptor signaling pathway	2	3.0303	0.0570041	GRID2, GRIK2	33.5841	1	0.846292	0.835329
			GOTERM_CC_DIRECT	GO:0030672~synaptic vesicle membrane	3	4.54545	0.0581811	SYT2, PRRT2, ABCC8	7.57331	0.999535	0.413733	0.378177
			INTERPRO	IPR001148:Alpha carbonic anhydrase	2	3.0303	0.0585655	CA4, CA8	32.6991	0.999983	0.748848	0.744734
			GOTERM_BP_DIRECT	GO:0060122~inner ear receptor stereocilium organization	2	3.0303	0.0599141	CECR2, CDH23	31.9049	1	0.85655	0.845455
			UP_SEQ_FEATURE	TRANSMEM:Helical; Name=S4 of repeat I	2	3.0303	0.061327	CACNA1A, CACNA1G	31.1864	1	0.495101	0.488943
			UP_SEQ_FEATURE	TRANSMEM:Helical; Name=S4 of repeat II	2	3.0303	0.061327	CACNA1A, CACNA1G	31.1864	1	0.495101	0.488943
			INTERPRO	IPR001508:NMDA receptor	2	3.0303	0.0617183	GRID2, GRIK2	30.9781	0.999991	0.748848	0.744734
			INTERPRO	IPR019594:Glutamate receptor, L-glutamate/glycine-binding	2	3.0303	0.0617183	GRID2, GRIK2	30.9781	0.999991	0.748848	0.744734
			INTERPRO	IPR001320:Ionotropic glutamate receptor	2	3.0303	0.0617183	GRID2, GRIK2	30.9781	0.999991	0.748848	0.744734
			GOTERM_MF_DIRECT	GO:0016836~hydro-lyase activity	2	3.0303	0.0622938	CA4, CA8	30.6312	0.999892	0.804156	0.798493
			UP_SEQ_FEATURE	TRANSMEM:Helical; Name=S5 of repeat IV	2	3.0303	0.0642942	CACNA1A, CACNA1G	29.7013	1	0.495101	0.488943
			UP_SEQ_FEATURE	TRANSMEM:Helical; Name=S2 of repeat III	2	3.0303	0.0642942	CACNA1A, CACNA1G	29.7013	1	0.495101	0.488943
			UP_SEQ_FEATURE	REPEAT:III	2	3.0303	0.0642942	CACNA1A, CACNA1G	29.7013	1	0.495101	0.488943
			UP_SEQ_FEATURE	TRANSMEM:Helical; Name=S1 of repeat III	2	3.0303	0.0642942	CACNA1A, CACNA1G	29.7013	1	0.495101	0.488943
			UP_SEQ_FEATURE	REPEAT:II	2	3.0303	0.0642942	CACNA1A, CACNA1G	29.7013	1	0.495101	0.488943
			UP_SEQ_FEATURE	TRANSMEM:Helical; Name=S3 of repeat III	2	3.0303	0.0642942	CACNA1A, CACNA1G	29.7013	1	0.495101	0.488943
			UP_SEQ_FEATURE	TRANSMEM:Helical; Name=S3 of repeat IV	2	3.0303	0.0642942	CACNA1A, CACNA1G	29.7013	1	0.495101	0.488943
			UP_SEQ_FEATURE	TRANSMEM:Helical; Name=S6 of repeat IV	2	3.0303	0.0642942	CACNA1A, CACNA1G	29.7013	1	0.495101	0.488943
			UP_SEQ_FEATURE	TRANSMEM:Helical; Name=S5 of repeat III	2	3.0303	0.0642942	CACNA1A, CACNA1G	29.7013	1	0.495101	0.488943
			UP_SEQ_FEATURE	REPEAT:I	2	3.0303	0.0642942	CACNA1A, CACNA1G	29.7013	1	0.495101	0.488943
			UP_SEQ_FEATURE	REPEAT:IV	2	3.0303	0.0642942	CACNA1A, CACNA1G	29.7013	1	0.495101	0.488943
			UP_SEQ_FEATURE	TRANSMEM:Helical; Name=S6 of repeat III	2	3.0303	0.0642942	CACNA1A, CACNA1G	29.7013	1	0.495101	0.488943
			UP_SEQ_FEATURE	TRANSMEM:Helical; Name=S2 of repeat IV	2	3.0303	0.0642942	CACNA1A, CACNA1G	29.7013	1	0.495101	0.488943
			UP_SEQ_FEATURE	TRANSMEM:Helical; Name=S1 of repeat IV	2	3.0303	0.0642942	CACNA1A, CACNA1G	29.7013	1	0.495101	0.488943
			GOTERM_BP_DIRECT	GO:0043523~regulation of neuron apoptotic process	2	3.0303	0.0657077	GRID2, GRM4	29.0045	1	0.876331	0.86498
			UP_SEQ_FEATURE	ZN_FING:C2H2-type 2; atypical	2	3.0303	0.0672521	ZIC2, ZIC3	28.3512	1	0.495101	0.488943
			GOTERM_BP_DIRECT	GO:0034765~regulation of ion transmembrane transport	3	4.54545	0.0685362	KCNC3, CACNA1A, CACNA1G	6.88595	1	0.876331	0.86498
			UP_SEQ_FEATURE	TRANSMEM:Helical; Name=S1 of repeat I	2	3.0303	0.0702008	CACNA1A, CACNA1G	27.1186	1	0.495101	0.488943
			UP_SEQ_FEATURE	TRANSMEM:Helical; Name=S5 of repeat I	2	3.0303	0.0702008	CACNA1A, CACNA1G	27.1186	1	0.495101	0.488943
			UP_SEQ_FEATURE	TRANSMEM:Helical; Name=S1 of repeat II	2	3.0303	0.0702008	CACNA1A, CACNA1G	27.1186	1	0.495101	0.488943
			UP_SEQ_FEATURE	TRANSMEM:Helical; Name=S6 of repeat I	2	3.0303	0.0702008	CACNA1A, CACNA1G	27.1186	1	0.495101	0.488943
			UP_SEQ_FEATURE	TRANSMEM:Helical; Name=S6 of repeat II	2	3.0303	0.0702008	CACNA1A, CACNA1G	27.1186	1	0.495101	0.488943
			UP_SEQ_FEATURE	TRANSMEM:Helical; Name=S3 of repeat II	2	3.0303	0.0702008	CACNA1A, CACNA1G	27.1186	1	0.495101	0.488943
			UP_SEQ_FEATURE	TRANSMEM:Helical; Name=S5 of repeat II	2	3.0303	0.0702008	CACNA1A, CACNA1G	27.1186	1	0.495101	0.488943
			UP_SEQ_FEATURE	TRANSMEM:Helical; Name=S2 of repeat II	2	3.0303	0.0702008	CACNA1A, CACNA1G	27.1186	1	0.495101	0.488943
			UP_SEQ_FEATURE	TRANSMEM:Helical; Name=S2 of repeat I	2	3.0303	0.0702008	CACNA1A, CACNA1G	27.1186	1	0.495101	0.488943
			UP_SEQ_FEATURE	TRANSMEM:Helical; Name=S3 of repeat I	2	3.0303	0.0702008	CACNA1A, CACNA1G	27.1186	1	0.495101	0.488943
			UP_SEQ_FEATURE	DOMAIN:Laminin EGF-like	2	3.0303	0.0702008	MEGF11, CELSR3	27.1186	1	0.495101	0.488943
			GOTERM_MF_DIRECT	GO:0008331~high voltage-gated calcium channel activity	2	3.0303	0.0708757	CACNA1A, CACNA1G	26.8023	0.999971	0.838696	0.83279
			SMART	SM01057:SM01057	2	3.0303	0.071344	CA4, CA8	26.5115	0.97706	1	1
			GOTERM_BP_DIRECT	GO:0071310~cellular response to organic substance	2	3.0303	0.0714662	CALB1, ABCC8	26.5874	1	0.876331	0.86498
			GOTERM_BP_DIRECT	GO:1903861~positive regulation of dendrite extension	2	3.0303	0.0714662	CPNE9, SYT2	26.5874	1	0.876331	0.86498
			UP_KW_MOLECULAR_FUNCTION	KW-0851~Voltage-gated channel	3	4.54545	0.0719701	KCNC3, CACNA1A, CACNA1G	6.595	0.932044	0.560096	0.560096
			UP_SEQ_FEATURE	COMPBIAS:Polar residues	29	43.9394	0.072605	TMEM151B, TMEM63C, ZBTB46, KCNC3, CACNA1A, CELSR3, CACNA1G, CECR2, ZIC2, ZIC3, CHN2, ZNF385C, INPP5J, OTX2, PCDHA2, SRRM3, SRRM4, SYT2, PRRT2, RBFOX3, ABCC8, PCDHGC4, ZIC5, PCDHA12, MYT1, SPTB, STXBP5L, LHX5, GRID2IP	1.30374	1	0.497453	0.491266
			UP_SEQ_FEATURE	COMPBIAS:Basic residues	6	9.09091	0.0730093	SRRM3, SRRM4, PRRT2, ZIC3, CACNA1A, GALNT9	2.63918	1	0.497453	0.491266
			GOTERM_BP_DIRECT	GO:0070509~calcium ion import	2	3.0303	0.0743324	CACNA1A, CACNA1G	25.5239	1	0.876331	0.86498
			GOTERM_BP_DIRECT	GO:0007417~central nervous system development	3	4.54545	0.0763963	ZIC2, ZIC3, ZIC5	6.46721	1	0.876331	0.86498
			GOTERM_BP_DIRECT	GO:0035235~ionotropic glutamate receptor signaling pathway	2	3.0303	0.0771898	GRID2, GRIK2	24.5422	1	0.876331	0.86498
			UP_KW_MOLECULAR_FUNCTION	KW-0217~Developmental protein	7	10.6061	0.0777911	ZIC2, ZIC3, OTX2, ZIC5, INSM1, MYT1, CELSR3	2.2432	0.945818	0.560096	0.560096
			UP_KW_MOLECULAR_FUNCTION	KW-9996~Developmental protein	7	10.6061	0.0777911	ZIC2, ZIC3, OTX2, ZIC5, INSM1, MYT1, CELSR3	2.2432	0.945818	0.560096	0.560096
			SMART	SM00079:PBPe	2	3.0303	0.0794029	GRID2, GRIK2	23.7208	0.985292	1	1
			SMART	SM00918:SM00918	2	3.0303	0.0794029	GRID2, GRIK2	23.7208	0.985292	1	1
			GOTERM_BP_DIRECT	GO:0010842~retina layer formation	2	3.0303	0.0828787	CALB1, MEGF11	22.7892	1	0.914033	0.902194
			GOTERM_BP_DIRECT	GO:0007269~neurotransmitter secretion	2	3.0303	0.0885331	GRM4, SYT2	21.2699	1	0.949271	0.936975
			KEGG_PATHWAY	hsa05033:Nicotine addiction	2	3.0303	0.0935115	CACNA1A, GABRD	19.5136	0.993309	0.77681	0.77681
			UP_KW_PTM	KW-0165~Cleavage on pair of basic residues	4	6.06061	0.0948979	ADAMTS16, MMP24, ADAM11, CHGB	3.60523	0.72643	0.592006	0.592006
			GOTERM_BP_DIRECT	GO:0046676~negative regulation of insulin secretion	2	3.0303	0.0969505	ABCC8, STXBP5L	19.3363	1	1	0.98961
HUVEC/Cbl genes (11 genes out of a total of 373 genes preferentially expressed in HUVEC were also preferentially expressed in cerebellum; 2.9%)
ADAMTS18	266.039		UP_KW_BIOLOGICAL_PROCESS	KW-0221~Differentiation	4	36.3636	0.00583586	COL13A1, TLL1, ZFPM2, ZNF521	8.1563	0.0401427	0.040851	0.040851
TLE2	11.7573		GOTERM_CC_DIRECT	GO:0031012~extracellular matrix	3	27.2727	0.00659264	RELN, COL13A1, ADAMTS18	21.755	0.196098	0.217557	0.217557
RGS11	11.0931		UP_KW_DOMAIN	KW-0677~Repeat	8	72.7273	0.0103739	TLE2, SPTBN5, RELN, ADAMTS18, ZNF702P, TLL1, ZFPM2, ZNF521	2.3131	0.0990282	0.103739	0.103739
COL13A1	8.5095		UP_KW_LIGAND	KW-0862~Zinc	6	54.5455	0.0275247	RELN, ADAMTS18, ZNF702P, TLL1, ZFPM2, ZNF521	2.33834	0.0803222	0.0582939	0.0388626
ZNF521	7.8891		UP_SEQ_FEATURE	ZN_FING:C2H2-type 2	3	27.2727	0.0360782	ZNF702P, ZFPM2, ZNF521	8.86816	0.997672	1	1
ZFPM2	7.49713		UP_SEQ_FEATURE	ZN_FING:C2H2-type 3	3	27.2727	0.0384117	ZNF702P, ZFPM2, ZNF521	8.5703	0.99844	1	1
TLL1	7.3326		UP_KW_LIGAND	KW-0479~Metal-binding	7	63.6364	0.0388626	RELN, GLCE, ADAMTS18, ZNF702P, TLL1, ZFPM2, ZNF521	1.71777	0.112116	0.0582939	0.0388626
SPTBN5	6.89617		GOTERM_BP_DIRECT	GO:0030199~collagen fibril organization	2	18.1818	0.0388761	COL13A1, TLL1	45.9551	0.983817	1	1
RELN	5.59819		INTERPRO	IPR024079:Metallopeptidase, catalytic domain	2	18.1818	0.0430647	ADAMTS18, TLL1	41.4048	0.766049	1	1
ZNF702P	5.39942		GOTERM_MF_DIRECT	GO:0046872~metal ion binding	5	45.4545	0.0435223	RELN, ADAMTS18, ZNF702P, ZFPM2, ZNF521	3.16182	0.823673	1	1
GLCE	5.30882		UP_KW_MOLECULAR_FUNCTION	KW-0217~Developmental protein	4	36.3636	0.0490872	RELN, COL13A1, TLL1, ZNF521	4.19507	0.529986	0.359688	0.359688
			UP_KW_MOLECULAR_FUNCTION	KW-9996~Developmental protein	4	36.3636	0.0490872	RELN, COL13A1, TLL1, ZNF521	4.19507	0.529986	0.359688	0.359688
			GOTERM_BP_DIRECT	GO:0030154~cell differentiation	3	27.2727	0.0511418	COL13A1, TLL1, ZFPM2	7.32113	0.995745	1	1
			GOTERM_MF_DIRECT	GO:0004222~metalloendopeptidase activity	2	18.1818	0.057492	ADAMTS18, TLL1	30.8052	0.900662	1	1
			GOTERM_CC_DIRECT	GO:0005615~extracellular space	4	36.3636	0.0638753	TLE2, RELN, COL13A1, TLL1	3.77714	0.886757	0.912138	0.912138
			INTERPRO	IPR013087:Zinc finger C2H2-type/integrase DNA-binding domain	3	27.2727	0.0653039	ZNF702P, ZFPM2, ZNF521	6.38556	0.892323	1	1
			GOTERM_BP_DIRECT	GO:0001501~skeletal system development	2	18.1818	0.0667725	COL13A1, TLL1	26.4071	0.999244	1	1
			UP_KW_MOLECULAR_FUNCTION	KW-0645~Protease	3	27.2727	0.0760777	RELN, ADAMTS18, TLL1	5.85451	0.694837	0.359688	0.359688
			GOTERM_CC_DIRECT	GO:0005576~extracellular region	4	36.3636	0.0829217	RELN, COL13A1, ADAMTS18, TLL1	3.39482	0.942534	0.912138	0.912138
			GOTERM_BP_DIRECT	GO:0030198~extracellular matrix organization	2	18.1818	0.0934677	COL13A1, ADAMTS18	18.6239	0.999963	1	1
			UP_KW_MOLECULAR_FUNCTION	KW-0678~Repressor	3	27.2727	0.0959168	TLE2, ZFPM2, ZNF521	5.1227	0.779643	0.359688	0.359688
NHEK/Cbl genes (15 genes out of a total of 735 genes preferentially expressed in NHEK were also preferentially expressed in cerebellum; 2.0%)
KRT31	322.519		UP_KW_BIOLOGICAL_PROCESS	KW-0443~Lipid metabolism	5	33.3333	0.00106415	CYP26B1, PLA2G4B, PCSK9, PLCH2, DEGS2	8.41545	0.0168912	0.0170265	0.0170265
FAT2	195.026		GOTERM_MF_DIRECT	GO:0005509~calcium ion binding	5	33.3333	0.00181679	PLA2G4B, FAT2, ESYT3, PLCH2, DNASE1L2	8.36684	0.0968194	0.10174	0.10174
PLCH2	69.9782		UP_KW_LIGAND	KW-0106~Calcium	6	40	0.00212107	PLA2G4B, FAT2, PCSK9, ESYT3, PLCH2, DNASE1L2	4.73388	0.0189285	0.0190897	0.0190897
DEGS2	35.2834		SMART	SM00239:C2	3	20	0.00397342	PLA2G4B, ESYT3, PLCH2	27.2073	0.0691565	0.0715216	0.0715216
HS3ST1	23.3352		INTERPRO	IPR000008:C2 calcium-dependent membrane targeting	3	20	0.00509048	PLA2G4B, ESYT3, PLCH2	25.85	0.248583	0.285067	0.285067
NEUROD2	21.4109		KEGG_PATHWAY	hsa01100:Metabolic pathways	5	33.3333	0.0229477	CYP26B1, PLA2G4B, CKMT1B, PLCH2, DEGS2	3.4778	0.524259	0.734325	0.734325
PLA2G4B	15.5657		UP_KW_CELLULAR_COMPONENT	KW-0333~Golgi apparatus	4	26.6667	0.0306335	TRIM7, FAT2, PCSK9, HS3ST1	5.24133	0.372924	0.459502	0.459502
DNASE1L2	14.4689		GOTERM_MF_DIRECT	GO:0005544~calcium-dependent phospholipid binding	2	13.3333	0.0391244	PLA2G4B, ESYT3	46.8543	0.893005	1	1
EXPH5	10.7917		GOTERM_CC_DIRECT	GO:0005794~Golgi apparatus	4	26.6667	0.0392373	TRIM7, FAT2, PCSK9, HS3ST1	4.80325	0.781519	1	1
ESYT3	10.3026		UP_KW_BIOLOGICAL_PROCESS	KW-0442~Lipid degradation	2	13.3333	0.0688789	PLA2G4B, PLCH2	25.0297	0.680774	0.551031	0.551031
CKMT1B	9.98825		UP_KW_CELLULAR_COMPONENT	KW-0256~Endoplasmic reticulum	4	26.6667	0.0708967	CYP26B1, PCSK9, ESYT3, DEGS2	3.75153	0.668136	0.531725	0.531725
PCSK9	9.62586		GOTERM_BP_DIRECT	GO:0001822~kidney development	2	13.3333	0.0823087	CYP26B1, PCSK9	21.8062	0.999957	1	1
CYP26B1	9.33305		UP_SEQ_FEATURE	DOMAIN:C2	2	13.3333	0.0892846	PLA2G4B, PLCH2	20.0321	0.999992	1	1
TRIM7	7.45805
NXPH4	5.23023
NHLF/Cbl genes (4 out of a total of 332 genes preferentially expressed in NHLF were also preferentially expressed in cerebellum; 1.2%)
FGF5	16.2531		INTERPRO	IPR013320:Concanavalin A-like lectin/glucanase, subgroup	2	50	0.036712	NPTX1, MDGA1	40.3565	0.337299	0.403832	0.403832
NPTX1	15.4514		GOTERM_BP_DIRECT	GO:0007399~nervous system development	2	50	0.0640953	FGF5, MDGA1	22.8965	0.879936	1	1
MDGA1	9.07962		GOTERM_BP_DIRECT	GO:0008284~positive regulation of cell proliferation	2	50	0.0816834	FGF5, MAB21L1	17.855	0.934573	1	1
MAB21L1	7.71083		UP_KW_DOMAIN	KW-0732~Signal	3	75	0.0918834	FGF5, NPTX1, MDGA1	3.29873	0.251098	0.27565	0.27565
aGenes preferentially expressed in cerebellum (see Table S2) and either myoblasts, a lymphoblastoid cell line (LCL), embryonic stem cells (ESC, H1), umbilical endothelial cells (HUVEC), keratincytes (NHEK), or lung fibroblasts (NHLF). The gene ontology terms with a p-value of <0.01 based upon the DAVID Functional Annotation Chart analysis (https://david.ncifcrf.gov/) are highlighted in colors. Cb…
bFPKM ratio: the ratio of FPKM for the cell culture to the average FPKM of the 5 other cell cultures

## Sheet: TableS6 Cloning Oligos
Table S6. Oligonucleotides used for fusion cloning of 5' ZNF556 sequences into CpG-free Luciferase reporter vectorsa
ZNF556 oligonucleotide Name	Chromosome position (hg19)	Size of region cloned (bp)	Forward primer sequence 5'-3' (F)b	Reverse primer sequence 5'-3' (R)b
-0.2 to +0.3 F and R	chr19:2867097-2867600	504	caaacagcagattaaaagCAATTAGGAAAGCTGGGG	ggtgggccctgcaggCAGGGAATGAAGACTGGG
-0.6 to +0.1 F and R	chr19:2866698-2867414	717	caaacagcagattaaaagAAGCTTTCGTTGGTCACTC	ggtgggccctgcaggGTCCGTTCCTGAGCTCTT
-1.3 to +0.1 F and R	chr19:2865977-2867414	1438	caaacagcagattaaaagGCTTCCGTGATCACAGTATAC	ggtgggccctgcaggGTCCGTTCCTGAGCTCTTTG
aThis table is coordinated with Figure 3A and B
bLower-case letters are the extensions that were used for fusion cloning; NEBuilder HiFi Assembly, New England Biolabs
